# Supplementary material for: Dialects of Madagascar
Source: PubMed Central journal article supplement (PMC7531839; doi:10.1371/journal.pone.0240170), 2020-10-02
Supplement: pone.0240170.s001.pdf [file pone.0240170.s001.pdf]

# Malagasy Swadesh lists

*collected by Maurizio Serva*

*elaborated by Michele Pasquini*

*November 2019 update*

*(click on the dialect name to get it)*

- |                                    |                                          |
|------------------------------------|------------------------------------------|
| 0 - English reference              |                                          |
| 1 - Sakalava (Ambanja)             | 31 - Bara (Ranohira)                     |
| 2 - Sihanaka (Ambatondrazaka)      | 32 - Antanalana (Manorofify)             |
| 3 - Antankarana (Ambilobe)         | 33 - Antandroy (Toliara)                 |
| 4 - Antandroy (Ambovombe)          | 34 - Antanalana (Anakao)                 |
| 5 - Mahafaly (Ampanihy)            | 35 - Betsimisaraka (Marolambo)           |
| 6 - Mikea (Ampokafo)               | 36 - Betsimisaraka (Antsiranana)         |
| 7 - Betsimisaraka (Antalaha)       | 37 - Betsimisaraka (Brickaville)         |
| 8 - Merina (Antananarivo)          | 38 - Betsimisaraka (Toamasina)           |
| 9 - Bara (Betroka)                 | 39 - Betsimisaraka (Mananara)            |
| 10 - Zafisoro (Farafangana)        | 40 - Tsimihety (Mampikony)               |
| 11 - Betsimisaraka (Fenoarivo-Est) | 41 - Tsimihety (Andapa)                  |
| 12 - Betsileo (Fianarantsoa)       | 42 - Nosy Boraha (Ambodifotatra)         |
| 13 - Betsimisaraka (Mahanoro)      | 43 - Bara (Beroroha)                     |
| 14 - Sakalava (Maintirano)         | 44 - Sakalava (Miandrivazo)              |
| 15 - Sakalava (Mahajanga)          | 45 - Vezo (Morondava)                    |
| 16 - Antaimoro (Manakara)          | 46 - Bara (Ihosa)                        |
| 17 - Antambohoaka (Mananjary)      | 47 - Tsimihety (Antsohihy)               |
| 18 - Tsimihety (Mandritsara)       | 48 - Merina (Maevatanana)                |
| 19 - Masikoro (Miary)              | 49 - Sakalava (Besalampy)                |
| 20 - Sakalava (Morondava)          | 50 - Betsimisaraka (Tanambao Manampotsy) |
| 21 - Antanosy (Tolagnaro)          | 51 - Sihanaka (Morarano Chrome)          |
| 22 - Vezo (Toliara)                | 52 - Betsileo (Ambohimahaso)             |
| 23 - Antaisaka (Vangaindrano)      | 53 - Betsimisaraka (Maroantsetra)        |
| 24 - Antankarana (Vohemar)         | 54 - Merina (Analavory)                  |
| 25 - Betsileo (Ambositra)          | 55 - Betsimisaraka (Sahavato)            |
| 26 - Betsileo (Ambalavao)          | 56 - Mahafaly (Ejeda)                    |
| 27 - Antanalana (Itampolo)         | 57 - Antanosy (Belamoty)                 |
| 28 - Vezo (Morombe)                | 58 - Sihanaka (Andilamena)               |
| 29 - Antanosy (Bezaha)             | 59 - Antandroy (Tsihombe)                |
| 30 - Tanala (Ifanadiana)           | 60 - Sakalava (Belon'i Tsiribihina)      |

**English reference**

|    |                   |     |                    |     |                             |     |                       |
|----|-------------------|-----|--------------------|-----|-----------------------------|-----|-----------------------|
| 1  | I                 | 53  | stick              | 105 | to smell (perceive)         | 157 | sand                  |
| 2  | you (singular)    | 54  | fruit              | 106 | to fear                     | 158 | dust                  |
| 3  | he                | 55  | seed (semen)       | 107 | to sleep                    | 159 | earth                 |
| 4  | we                | 56  | leaf               | 108 | to live                     | 160 | cloud                 |
| 5  | you (plural)      | 57  | root               | 109 | to die                      | 161 | fog                   |
| 6  | they              | 58  | bark (of a tree)   | 110 | to kill                     | 162 | sky                   |
| 7  | this              | 59  | flower             | 111 | to fight                    | 163 | wind                  |
| 8  | that              | 60  | grass              | 112 | to hunt                     | 164 | snow                  |
| 9  | here              | 61  | rope               | 113 | to hit                      | 165 | ice                   |
| 10 | there             | 62  | skin               | 114 | to cut                      | 166 | smoke                 |
| 11 | who               | 63  | meat               | 115 | to split                    | 167 | fire                  |
| 12 | what              | 64  | blood              | 116 | to stab                     | 168 | ash                   |
| 13 | where             | 65  | bone               | 117 | to scratch                  | 169 | to burn               |
| 14 | when              | 66  | fat (noun)         | 118 | to dig                      | 170 | road                  |
| 15 | how               | 67  | egg                | 119 | to swim                     | 171 | mountain              |
| 16 | not               | 68  | horn               | 120 | to fly                      | 172 | red                   |
| 17 | all               | 69  | tail               | 121 | to walk (to go)             | 173 | green                 |
| 18 | many              | 70  | feather            | 122 | to come                     | 174 | yellow                |
| 19 | some              | 71  | hair (on the head) | 123 | to lie (state, as in a bed) | 175 | white                 |
| 20 | few               | 72  | head               | 124 | to sit (state)              | 176 | black                 |
| 21 | other             | 73  | ear                | 125 | to stand (state)            | 177 | night                 |
| 22 | one               | 74  | eye                | 126 | to turn (intransitive)      | 178 | day                   |
| 23 | two               | 75  | nose               | 127 | to fall                     | 179 | year                  |
| 24 | three             | 76  | mouth              | 128 | to give                     | 180 | warm                  |
| 25 | four              | 77  | tooth              | 129 | to hold                     | 181 | cold                  |
| 26 | five              | 78  | tongue             | 130 | to squeeze                  | 182 | full                  |
| 27 | big               | 79  | finger nail        | 131 | to rub                      | 183 | new                   |
| 28 | long              | 80  | foot               | 132 | to wash                     | 184 | old                   |
| 29 | wide              | 81  | leg                | 133 | to wipe                     | 185 | good                  |
| 30 | thick             | 82  | knee               | 134 | to pull                     | 186 | bad                   |
| 31 | heavy             | 83  | hand               | 135 | to push                     | 187 | rotten                |
| 32 | small             | 84  | wing               | 136 | to throw                    | 188 | dirty                 |
| 33 | short             | 85  | belly              | 137 | to tie                      | 189 | straight              |
| 34 | narrow            | 86  | guts               | 138 | to sew                      | 190 | round                 |
| 35 | thin              | 87  | neck               | 139 | to count                    | 191 | sharp (as a knife)    |
| 36 | woman             | 88  | back (of a person) | 140 | to say                      | 192 | dull (as a knife)     |
| 37 | man (adult male)  | 89  | breast             | 141 | to sing                     | 193 | smooth                |
| 38 | man (human being) | 90  | heart              | 142 | to play                     | 194 | wet                   |
| 39 | child             | 91  | liver              | 143 | to float                    | 195 | dry                   |
| 40 | wife              | 92  | to drink           | 144 | to flow                     | 196 | correct (just, right) |
| 41 | husband           | 93  | to eat             | 145 | to freeze                   | 197 | near                  |
| 42 | mother            | 94  | to bite            | 146 | to swell                    | 198 | far                   |
| 43 | father            | 95  | to suck            | 147 | sun                         | 199 | right (adj.)          |
| 44 | animal            | 96  | to spit            | 148 | moon                        | 200 | left (adj.)           |
| 45 | fish              | 97  | to vomit           | 149 | star                        | 201 | at                    |
| 46 | bird              | 98  | to blow            | 150 | water                       | 202 | in                    |
| 47 | dog               | 99  | to breathe         | 151 | rain                        | 203 | with                  |
| 48 | louse             | 100 | to laugh           | 152 | river                       | 204 | and                   |
| 49 | snake             | 101 | to see             | 153 | lake                        | 205 | if                    |
| 50 | worm              | 102 | to hear            | 154 | sea                         | 206 | because               |
| 51 | tree              | 103 | to know (facts)    | 155 | salt                        | 207 | name                  |
| 52 | forest            | 104 | to think           | 156 | stone                       |     |                       |

**1 - Sakalava (Ambanja)**

|    |           |     |              |     |                |     |            |
|----|-----------|-----|--------------|-----|----------------|-----|------------|
| 1  | zaho      | 53  | kobay        | 105 | maharegny      | 157 | jia        |
| 2  | anao      | 54  | voankazo     | 106 | mavozo         | 158 | laposiara  |
| 3  | izy       | 55  | ambeo        | 107 | mandry         | 159 | fotaka     |
| 4  | atsika    | 56  | ravigny      | 108 | velogno        | 160 | rondro     |
| 5  | anareo    | 57  | vahatra      | 109 | maty           | 161 | zavogno    |
| 6  | iro       | 58  | hodikakazo   | 110 | mamono         | 162 | lagnitry   |
| 7  | ty        | 59  | felany       | 111 | miady          | 163 | tsiko      |
| 8  | zegny     | 60  | ahitry       | 112 | mihaza         | 164 | laneige    |
| 9  | eto       | 61  | tady         | 113 | mamopoko       | 165 | lagilasy   |
| 10 | ry        | 62  | hoditra      | 114 | manapaka       | 166 | setroko    |
| 11 | azovy     | 63  | hena         | 115 | mamaky         | 167 | motro      |
| 12 | ino       | 64  | lio          | 116 | manomboko meso | 168 | jofo       |
| 13 | aia       | 65  | taholagna    | 117 | mikiky         | 169 | magnoro    |
| 14 | mbiagna   | 66  | jabora       | 118 | mangady        | 170 | lalagna    |
| 15 | karakory  | 67  | antody       | 119 | milomagno      | 171 | bongo      |
| 16 | tsy       | 68  | ampondo      | 120 | magnembana     | 172 | mena       |
| 17 | ziaby     | 69  | ohy          | 121 | mandeha        | 173 | maitso     |
| 18 | maro      | 70  | volomborogno | 122 | navy           | 174 | fondragna  |
| 19 | helihely  | 71  | fagneva      | 123 | mandry         | 175 | malandy    |
| 20 | hely      | 72  | loha         | 124 | mipetraka      | 176 | joby       |
| 21 | hafa      | 73  | sofigny      | 125 | mitsangagna    | 177 | aligny     |
| 22 | araiky    | 74  | maso         | 126 | mihodigny      | 178 | andra      |
| 23 | aroe      | 75  | orogno       | 127 | lavo           | 179 | taogno     |
| 24 | telo      | 76  | vava         | 128 | magnamia       | 180 | mafana     |
| 25 | aifatra   | 77  | nify         | 129 | mitagna        | 181 | manintsy   |
| 26 | dimy      | 78  | lela         | 130 | mamiaka        | 182 | feny       |
| 27 | maventy   | 79  | angofy       | 131 | mandrokotro    | 183 | vao        |
| 28 | lava      | 80  | vity         | 132 | manasa         | 184 | matoe      |
| 29 | mivelatra | 81  | peky         | 133 | mamitry        | 185 | tsara      |
| 30 | matevigny | 82  | lohalitry    | 134 | mitifitry      | 186 | ratsy      |
| 31 | mavesatra | 83  | tagnana      | 135 | miposy         | 187 | montraka   |
| 32 | hely      | 84  | elatra       | 136 | mitoraka       | 188 | maloto     |
| 33 | fohiky    | 85  | kibo         | 137 | manohy         | 189 | mahitsy    |
| 34 | malety    | 86  | tsontsory    | 138 | manjaitry      | 190 | boribory   |
| 35 | matify    | 87  | vozogno      | 139 | magnisaka      | 191 | maragnitry |
| 36 | magnangy  | 88  | tahezagna    | 140 | mivolagna      | 192 | magofogno  |
| 37 | lelahy    | 89  | tratra       | 141 | mihira         | 193 | malamatra  |
| 38 | olo       | 90  | fo           | 142 | misoma         | 194 | leny       |
| 39 | tsaiky    | 91  | aty          | 143 | miefogno       | 195 | maiky      |
| 40 | vady      | 92  | migiaka      | 144 | mivalagna      | 196 | marigny    |
| 41 | vady      | 93  | mihina       | 145 | mandry         | 197 | marikitry  |
| 42 | nindry    | 94  | magnekitry   | 146 | mivonto        | 198 | lavitry    |
| 43 | baba      | 95  | minono       | 147 | masoandro      | 199 | ankahery   |
| 44 | biby      | 96  | mihaka       | 148 | fanjava        | 200 | ankavia    |
| 45 | laoko     | 97  | mandoa       | 149 | lakintagna     | 201 | agny       |
| 46 | vorogno   | 98  | mitsitro     | 150 | rano           | 202 | agnatiny   |
| 47 | fandroaka | 99  | miaigny      | 151 | mahaleny       | 203 | miaraka    |
| 48 | hao       | 100 | mitokiky     | 152 | tegnandrano    | 204 | ndraiky    |
| 49 | bibilava  | 101 | mahita       | 153 | matsabory      | 205 | izy koa    |
| 50 | hankagna  | 102 | mitandregny  | 154 | ranomasigny    | 206 | fony       |
| 51 | kakazo    | 103 | mahay        | 155 | sira           | 207 | agnaragna  |
| 52 | atiala    | 104 | mandiniky    | 156 | vato           |     |            |

## 2 - Sihanaka (Ambatondrazaka)

|    |              |     |               |     |                |     |             |
|----|--------------|-----|---------------|-----|----------------|-----|-------------|
| 1  | za           | 53  | tapakazo      | 105 | mifofona       | 157 | fasika      |
| 2  | ianao        | 54  | voankazo      | 106 | mataotra       | 158 | vovoka      |
| 3  | izy          | 55  | voa           | 107 | matory         | 159 | tany        |
| 4  | antsika      | 56  | ravina        | 108 | velona         | 160 | abakabaka   |
| 5  | ianareo      | 57  | faka          | 109 | maty           | 161 | zavona      |
| 6  | ry zareo     | 58  | hodikitay     | 110 | mamono         | 162 | lanitra     |
| 7  | ty           | 59  | vonikazo      | 111 | miady          | 163 | rivotra     |
| 8  | izany        | 60  | ahitra        | 112 | mihaza         | 164 | anvandra    |
| 9  | eto          | 61  | tady          | 113 | mandaroka      | 165 | glasy       |
| 10 | akao         | 62  | oditra        | 114 | manapaka       | 166 | setroka     |
| 11 | iza          | 63  | hena          | 115 | mamaky         | 167 | afo         |
| 12 | inona        | 64  | lio           | 116 | mitoboka antsy | 168 | lavenona    |
| 13 | akaiza       | 65  | taolagna      | 117 | maniky         | 169 | mandoro     |
| 14 | ovina        | 66  | matavy        | 118 | mitombana      | 170 | lalana      |
| 15 | ahoana       | 67  | atody         | 119 | milomano       | 171 | vohitra     |
| 16 | tsy          | 68  | tandroka      | 120 | magnembana     | 172 | mena        |
| 17 | izy daholo   | 69  | rambo         | 121 | mandeha        | 173 | maitso      |
| 18 | betsaka      | 70  | volomborona   | 122 | avy            | 174 | mavo        |
| 19 | sasisasy     | 71  | volo          | 123 | matory         | 175 | fotsy       |
| 20 | kitika       | 72  | loha          | 124 | mipetraka      | 176 | mainty      |
| 21 | hafa         | 73  | sofina        | 125 | mijaridina     | 177 | alina       |
| 22 | raika        | 74  | maso          | 126 | mihodina       | 178 | andro       |
| 23 | roa          | 75  | orona         | 127 | mikarapoka     | 179 | taona       |
| 24 | telo         | 76  | vava          | 128 | manome         | 180 | mafana      |
| 25 | efatra       | 77  | nify          | 129 | mitantana      | 181 | mangatsiaka |
| 26 | dimy         | 78  | lela          | 130 | mifinjy        | 182 | feno        |
| 27 | ngenda       | 79  | angofo        | 131 | manakisina     | 183 | vaovao      |
| 28 | lava         | 80  | tongotra      | 132 | manasa         | 184 | antitra     |
| 29 | malalaka     | 81  | ranjo         | 133 | mamafa         | 185 | tsara       |
| 30 | mivalampatra | 82  | lohalika      | 134 | mikendry       | 186 | ratsy       |
| 31 | mavesatra    | 83  | tanana        | 135 | manosika       | 187 | masiso      |
| 32 | bilitika     | 84  | elatra        | 136 | manoraka       | 188 | maloto      |
| 33 | pota         | 85  | kibo          | 137 | mamatotra      | 189 | mahitsy     |
| 34 | tery         | 86  | tsinay        | 138 | manjaitra      | 190 | boribory    |
| 35 | manify       | 87  | tenda         | 139 | manisa         | 191 | matsiko     |
| 36 | vehivavy     | 88  | lakambo       | 140 | miteny         | 192 | dombo       |
| 37 | lelahy       | 89  | tratra        | 141 | mihira         | 193 | malama      |
| 38 | olona        | 90  | fo            | 142 | midaola        | 194 | mando       |
| 39 | ankizy       | 91  | aty           | 143 | mitsangevana   | 195 | maina       |
| 40 | vady         | 92  | misotro       | 144 | mikoriana      | 196 | mety        |
| 41 | vady         | 93  | inana         | 145 | mivaingana     | 197 | akaiky      |
| 42 | neny         | 94  | manaikitra    | 146 | mibontsina     | 198 | alavitra    |
| 43 | dada         | 95  | mitsetsitra   | 147 | masova         | 199 | ankavanana  |
| 44 | biby         | 96  | mandrora      | 148 | volana         | 200 | ankavia     |
| 45 | lapia        | 97  | mandoa        | 149 | kintana        | 201 | any         |
| 46 | vorona       | 98  | mitsoka       | 150 | rano           | 202 | anaty       |
| 47 | amboa        | 99  | miaina        | 151 | orana          | 203 | amin ny     |
| 48 | hao          | 100 | mivanitika    | 152 | renirano       | 204 | sy          |
| 49 | bibilava     | 101 | mitazana      | 153 | farihy         | 205 | raha        |
| 50 | felika       | 102 | mihaino       | 154 | ranomasina     | 206 | satria      |
| 51 | kakazo       | 103 | mahay         | 155 | sira           | 207 | anarana     |
| 52 | ala          | 104 | mieritreritra | 156 | vato           |     |             |

### 3 - Antankarana (Ambilobe)

|    |           |     |                  |     |                |     |            |
|----|-----------|-----|------------------|-----|----------------|-----|------------|
| 1  | zaho      | 53  | kibay            | 105 | maharegny      | 157 | jia        |
| 2  | anao      | 54  | voankazo         | 106 | mavozo         | 158 | laposiera  |
| 3  | izy       | 55  | ambio            | 107 | matoro         | 159 | tany       |
| 4  | atsika    | 56  | ravigny          | 108 | velogno        | 160 | rondro     |
| 5  | anaro     | 57  | fototro          | 109 | maty           | 161 | zavogno    |
| 6  | iro       | 58  | hodikakazo       | 110 | mamono         | 162 | lagnitry   |
| 7  | ity       | 59  | folera           | 111 | miady          | 163 | tsiko      |
| 8  | izegny    | 60  | ahitry           | 112 | mihaza         | 164 | lanezy     |
| 9  | eto       | 61  | tady             | 113 | mamopoko       | 165 | ranomandry |
| 10 | iry       | 62  | hoditry          | 114 | mandidy        | 166 | setroko    |
| 11 | zovy      | 63  | hena             | 115 | mamaky         | 167 | motro      |
| 12 | ino       | 64  | lio              | 116 | mitomboko meso | 168 | jofo       |
| 13 | aia       | 65  | taolagna         | 117 | magnihikihy    | 169 | magnoro    |
| 14 | ombiagna  | 66  | vondraka         | 118 | mangady        | 170 | lalabe     |
| 15 | akory     | 67  | atody            | 119 | milomagno      | 171 | bongo      |
| 16 | tsy       | 68  | ampondo          | 120 | mitiligny      | 172 | mena       |
| 17 | jiaby     | 69  | ohy              | 121 | mandeha        | 173 | maitso     |
| 18 | maro      | 70  | volovolomborogno | 122 | navy           | 174 | vogny      |
| 19 | vitsy     | 71  | fagneva          | 123 | mandry         | 175 | malandy    |
| 20 | hely      | 72  | loha             | 124 | mipetraka      | 176 | joby       |
| 21 | hafa      | 73  | sofigny          | 125 | mitsangana     | 177 | aligny     |
| 22 | araiky    | 74  | fagnenty         | 126 | mierigny       | 178 | andra      |
| 23 | aroe      | 75  | orogno           | 127 | lavo           | 179 | taogno     |
| 24 | telo      | 76  | vava             | 128 | magnomia       | 180 | mafana     |
| 25 | efatra    | 77  | nify             | 129 | mitagna        | 181 | manintsy   |
| 26 | dimy      | 78  | lela             | 130 | misery         | 182 | feny       |
| 27 | maventy   | 79  | angofy           | 131 | magnisiky      | 183 | vao        |
| 28 | lava      | 80  | vity             | 132 | manasa         | 184 | matoe      |
| 29 | malalaka  | 81  | vavitsy          | 133 | mamotro        | 185 | tsara      |
| 30 | matevigny | 82  | lohality         | 134 | mitifitry      | 186 | ratsy      |
| 31 | mavesatra | 83  | tagnana          | 135 | mandronjy      | 187 | motraka    |
| 32 | hely      | 84  | elatra           | 136 | magnatsipy     | 188 | maloto     |
| 33 | foehiky   | 85  | troko            | 137 | mamehy         | 189 | mahitsy    |
| 34 | malety    | 86  | tsontsory        | 138 | manjaitry      | 190 | boribory   |
| 35 | matify    | 87  | vozogno          | 139 | magnisa        | 191 | maragnitry |
| 36 | magnangy  | 88  | tahezagna        | 140 | mivolagna      | 192 | magofogno  |
| 37 | lelahy    | 89  | tratra           | 141 | mihira         | 193 | madoso     |
| 38 | olo       | 90  | fo               | 142 | misoma         | 194 | mando      |
| 39 | tsaiky    | 91  | aty              | 143 | milailay       | 195 | maiky      |
| 40 | vady      | 92  | migiaka          | 144 | mivalagna      | 196 | mety       |
| 41 | vady      | 93  | mihina           | 145 | mandry         | 197 | marikitry  |
| 42 | indry     | 94  | magnekitry       | 146 | mivonto        | 198 | lavitry    |
| 43 | baba      | 95  | minono           | 147 | masoandra      | 199 | ankahery   |
| 44 | kaka      | 96  | mikahaka         | 148 | fanjava        | 200 | ankavia    |
| 45 | laoko     | 97  | mandoa           | 149 | lakinta        | 201 | agny       |
| 46 | vorogno   | 98  | mitsotro         | 150 | rano           | 202 | agnaty     |
| 47 | fandroaka | 99  | miaigny          | 151 | mahalegny      | 203 | amin ny    |
| 48 | hao       | 100 | mitokiky         | 152 | tegnandrano    | 204 | ndraiky    |
| 49 | biby      | 101 | mizaha           | 153 | matsabory      | 205 | izy koa    |
| 50 | hankagna  | 102 | mitandregny      | 154 | ranomasigny    | 206 | fony       |
| 51 | kakazo    | 103 | mahay            | 155 | sira           | 207 | agnaragna  |
| 52 | atiala    | 104 | mieritreritry    | 156 | vato           |     |            |

#### 4 - Antandroy (Ambovombe)

|    |           |     |              |     |                |     |                |
|----|-----------|-----|--------------|-----|----------------|-----|----------------|
| 1  | raho      | 53  | kobay        | 105 | magnatso       | 157 | faseke         |
| 2  | irehe     | 54  | voankazo     | 106 | votro          | 158 | deboke         |
| 3  | ireke     | 55  | voa          | 107 | mirotse        | 159 | tane           |
| 4  | itika     | 56  | rave e       | 108 | velogne        | 160 | rahogne        |
| 5  | nareo     | 57  | foto e       | 109 | vilasy         | 161 | zavogne        |
| 6  | iereo     | 58  | holinkatay   | 110 | mamono         | 162 | lagnitse       |
| 7  | itoy      | 59  | voninkazo    | 111 | mialy          | 163 | tioke          |
| 8  | igne      | 60  | akata        | 112 | mikodebe       | 164 | ranomivongagne |
| 9  | etoagne   | 61  | taly         | 113 | mijera         | 165 | ranomivongagne |
| 10 | ao        | 62  | holitse      | 114 | manankape      | 166 | setroke        |
| 11 | ia        | 63  | hena         | 115 | mandrara       | 167 | afo            |
| 12 | inogne    | 64  | lio          | 116 | mitomboke mesa | 168 | lavenoke       |
| 13 | aia       | 65  | taolagne     | 117 | mikihy         | 169 | magnoro        |
| 14 | ombia     | 66  | vondrake     | 118 | magnaly        | 170 | lalagne        |
| 15 | akore     | 67  | atoly        | 119 | milaogne       | 171 | vohitse        |
| 16 | tsy       | 68  | tsifa        | 120 | mitiligne      | 172 | mena           |
| 17 | iaby      | 69  | ohy          | 121 | magnavelo      | 173 | maintso        |
| 18 | maro      | 70  | volomborogne | 122 | avy            | 174 | mavogne        |
| 19 | kelekele  | 71  | maroy        | 123 | matory         | 175 | foty           |
| 20 | kede      | 72  | agnabony     | 124 | mitoboke       | 176 | mainte         |
| 21 | hafa      | 73  | ravembia     | 125 | mitsangagne    | 177 | hariva         |
| 22 | raike     | 74  | fihaino      | 126 | mihodigne      | 178 | andro          |
| 23 | roe       | 75  | fagnatsogne  | 127 | tonta          | 179 | taogne         |
| 24 | telo      | 76  | falie        | 128 | manolotse      | 180 | matsovoke      |
| 25 | efatre    | 77  | famotse      | 129 | mitagne        | 181 | manitsy        |
| 26 | dime      | 78  | fameleke     | 130 | mamihigne      | 182 | feny           |
| 27 | bey       | 79  | hoho         | 131 | midraso        | 183 | vaovao         |
| 28 | lava      | 80  | fandia       | 132 | manasa         | 184 | antetre        |
| 29 | mahalagne | 81  | ranjo        | 133 | mamafa         | 185 | soa            |
| 30 | matevegne | 82  | ongotse      | 134 | mitifitse      | 186 | raty           |
| 31 | mavesatse | 83  | fita         | 135 | manoseke       | 187 | logne          |
| 32 | kedekede  | 84  | elatse       | 136 | mitorake       | 188 | maloto         |
| 33 | bory      | 85  | troke        | 137 | mamehe         | 189 | mahintsy       |
| 34 | tere      | 86  | tsinay       | 138 | manjaitse      | 190 | boribory       |
| 35 | manify    | 87  | vozogne      | 139 | magnisake      | 191 | maragnetse     |
| 36 | ampela    | 88  | lambosy      | 140 | misaontsy      | 192 | domoke         |
| 37 | lahilahy  | 89  | aragna       | 141 | mibeko         | 193 | malama         |
| 38 | ndaty     | 90  | agnarofy     | 142 | mihisa         | 194 | legne          |
| 39 | ajaja     | 91  | ate          | 143 | mihafogne      | 195 | maike          |
| 40 | valy      | 92  | minogne      | 144 | mirarake       | 196 | mete           |
| 41 | valy      | 93  | mikama       | 145 | mivongagne     | 197 | marine         |
| 42 | nene      | 94  | manifatse    | 146 | mibotignake    | 198 | lavitse        |
| 43 | rae       | 95  | mitsintsike  | 147 | masoandro      | 199 | havanagne      |
| 44 | biby      | 96  | mandrehoke   | 148 | volagne        | 200 | havia          |
| 45 | fiagne    | 97  | mandoa       | 149 | kintagne       | 201 | agne           |
| 46 | vorogne   | 98  | mifioke      | 150 | rano           | 202 | agnate e       |
| 47 | amboa     | 99  | miaigne      | 151 | oragne         | 203 | amin ny        |
| 48 | hao       | 100 | lagnake      | 152 | renerano       | 204 | sy             |
| 49 | meregne   | 101 | mahavazoho   | 153 | sihanake       | 205 | naho           |
| 50 | soko      | 102 | mijanjigne   | 154 | riake          | 206 | satria         |
| 51 | hatay     | 103 | mahafohigne  | 155 | sira           | 207 | tahina         |
| 52 | ala       | 104 | mieretretre  | 156 | vato           |     |                |

### 5 - Mahafaly (Ampanihy)

|    |           |     |            |     |                |     |            |
|----|-----------|-----|------------|-----|----------------|-----|------------|
| 1  | iaho      | 53  | kobay      | 105 | magnimbo       | 157 | faseke     |
| 2  | iha       | 54  | voanketae  | 106 | mavaka         | 158 | deboke     |
| 3  | ireke     | 55  | voae       | 107 | miroro         | 159 | tane       |
| 4  | itika     | 56  | ravine     | 108 | velo           | 160 | rahongne   |
| 5  | iareo     | 57  | vahae      | 109 | mate           | 161 | mika       |
| 6  | ireo      | 58  | holinkatae | 110 | mamono         | 162 | lagnitse   |
| 7  | itike     | 59  | folera     | 111 | mialy          | 163 | tioke      |
| 8  | iroke     | 60  | ahetse     | 112 | mihaza         | 164 | havandra   |
| 9  | etoa      | 61  | taly       | 113 | mamango        | 165 | ranomandre |
| 10 | ao        | 62  | holine     | 114 | mandily        | 166 | setroke    |
| 11 | ia        | 63  | hena       | 115 | mamaky         | 167 | afo        |
| 12 | ino       | 64  | lio        | 116 | mitomboke meso | 168 | lavenoke   |
| 13 | aia       | 65  | taola      | 117 | magnihy        | 169 | magnoro    |
| 14 | ombia     | 66  | vondrake   | 118 | mihaly         | 170 | lala       |
| 15 | talilio   | 67  | atoly      | 119 | milagno        | 171 | vohitse    |
| 16 | tsie      | 68  | tsifa      | 120 | mitily         | 172 | mena       |
| 17 | iaby      | 69  | ramboe     | 121 | mandeha        | 173 | maitso     |
| 18 | maro      | 70  | volomboro  | 122 | avy            | 174 | vogne      |
| 19 | tsy ampe  | 71  | volo       | 123 | mandre         | 175 | foty       |
| 20 | kele      | 72  | loha       | 124 | mitoboke       | 176 | mainte     |
| 21 | hafa      | 73  | sofy       | 125 | miongaha       | 177 | haleke     |
| 22 | raike     | 74  | fijere     | 126 | mihodike       | 178 | andro      |
| 23 | roe       | 75  | oro        | 127 | lavo           | 179 | tao        |
| 24 | telo      | 76  | fitava     | 128 | magnomey       | 180 | mae        |
| 25 | efatse    | 77  | nife       | 129 | mifampitanjake | 181 | manintsy   |
| 26 | lime      | 78  | lela       | 130 | mipiritse      | 182 | feny       |
| 27 | bey       | 79  | hoho       | 131 | mapikasoke     | 183 | vao        |
| 28 | lava      | 80  | tomboke    | 132 | manasa         | 184 | antetse    |
| 29 | malalake  | 81  | ranjo      | 133 | mipio          | 185 | soa        |
| 30 | mateve    | 82  | ongotse    | 134 | mitifitse      | 186 | raty       |
| 31 | mavesatse | 83  | tagna      | 135 | manoseke       | 187 | taratavohe |
| 32 | masay     | 84  | elae       | 136 | mitorake       | 188 | maloto     |
| 33 | boribory  | 85  | troke      | 137 | mandrohy       | 189 | mahity     |
| 34 | titse     | 86  | tinay      | 138 | mitrebeke      | 190 | boribory   |
| 35 | matify    | 87  | vozo       | 139 | magnisake      | 191 | maragnitse |
| 36 | ampisafe  | 88  | lambosy    | 140 | misafa         | 192 | dobo       |
| 37 | zaranjaka | 89  | tratra     | 141 | miantsa        | 193 | malama     |
| 38 | ndaty     | 90  | fo         | 142 | mihisa         | 194 | mando      |
| 39 | ajaja     | 91  | ate        | 143 | mihafy         | 195 | maike      |
| 40 | valy      | 92  | mino       | 144 | mandeha        | 196 | ie         |
| 41 | valy      | 93  | mitava     | 145 | mandreke       | 197 | marine     |
| 42 | nene      | 94  | mitifatse  | 146 | mibokinake     | 198 | lavitse    |
| 43 | baba      | 95  | mamiake    | 147 | andro          | 199 | havagna    |
| 44 | biby      | 96  | mandrehoke | 148 | vola           | 200 | havia      |
| 45 | fia       | 97  | mandoa     | 149 | kita           | 201 | angne      |
| 46 | voron     | 98  | mitioke    | 150 | rano           | 202 | ampoe      |
| 47 | ambo      | 99  | miay       | 151 | ora            | 203 | amine      |
| 48 | hao       | 100 | homehe     | 152 | ranobey        | 204 | naho       |
| 49 | mere      | 101 | mahisake   | 153 | sihanaky       | 205 | laha       |
| 50 | soko      | 102 | mitsano    | 154 | riake          | 206 | safe       |
| 51 | kata      | 103 | mahay      | 155 | sira           | 207 | tahina     |
| 52 | ala       | 104 | mandineke  | 156 | vato           |     |            |

**6 - Mikea (Ampoakafo)**

|    |             |     |             |     |            |     |                 |
|----|-------------|-----|-------------|-----|------------|-----|-----------------|
| 1  | zaho        | 53  | kobay       | 105 | mahare     | 157 | tane            |
| 2  | iha         | 54  | voanikazo   | 106 | matahotse  | 158 | lemboke         |
| 3  | ie          | 55  | voane       | 107 | mierotre   | 159 | tane            |
| 4  | tsika       | 56  | ravine      | 108 | velo       | 160 | hiboke          |
| 5  | nareo       | 57  | vakany      | 109 | mate       | 161 | ando            |
| 6  | roze        | 58  | faninkazo   | 110 | mamono     | 162 | monto           |
| 7  | toy         | 59  | folera      | 111 | mialy      | 163 | tsioke          |
| 8  | eroy        | 60  | akata       | 112 | mangoro    | 164 | ranovory        |
| 9  | etoa        | 61  | hosy        | 113 | mamango    | 165 | mangatsakatsake |
| 10 | ao          | 62  | holitse     | 114 | mandidy    | 166 | setroke         |
| 11 | ia          | 63  | hena        | 115 | mamatsike  | 167 | bolo            |
| 12 | ino         | 64  | fere        | 116 | mitomboke  | 168 | lavenoke        |
| 13 | aia         | 65  | taola       | 117 | manaotse   | 169 | manoro          |
| 14 | mbia        | 66  | vondrake    | 118 | mihale     | 170 | lala            |
| 15 | magnino     | 67  | atoly       | 119 | milagno    | 171 | anabo           |
| 16 | tsie        | 68  | tsifa       | 120 | tomily     | 172 | mena            |
| 17 | iabe        | 69  | hohy        | 121 | mandeha    | 173 | maitso          |
| 18 | maro        | 70  | volo        | 122 | havy       | 174 | vogne           |
| 19 | tsyampeampe | 71  | volondoa    | 123 | miroro     | 175 | foty            |
| 20 | kelekele    | 72  | kabeso      | 124 | mipetsake  | 176 | jobe            |
| 21 | hata        | 73  | sofy        | 125 | mitsanga   | 177 | ale             |
| 22 | raike       | 74  | maso        | 126 | mivalike   | 178 | andro           |
| 23 | roe         | 75  | oro         | 127 | lavo       | 179 | tao             |
| 24 | telo        | 76  | vava        | 128 | magnome    | 180 | mafana          |
| 25 | efatse      | 77  | hy          | 129 | manja      | 181 | manintsy        |
| 26 | lime        | 78  | lela        | 130 | mandrambe  | 182 | atsiky          |
| 27 | be          | 79  | hoho        | 131 | mazaotse   | 183 | vao             |
| 28 | lava        | 80  | tomboke     | 132 | manasa     | 184 | antitse         |
| 29 | malalake    | 81  | taola maike | 133 | mamafa     | 185 | soa             |
| 30 | mateve      | 82  | pokopoko    | 134 | mitititse  | 186 | raty            |
| 31 | mavesatse   | 83  | tagna       | 135 | mandronje  | 187 | mavay           |
| 32 | kelekele    | 84  | helatse     | 136 | mitorake   | 188 | maloto          |
| 33 | boriborike  | 85  | tsoke       | 137 | mamehe     | 189 | mahity          |
| 34 | tsiombe     | 86  | tinay       | 138 | mitsebeke  | 190 | laro            |
| 35 | matife      | 87  | vozo        | 139 | magnisake  | 191 | masio           |
| 36 | ampela      | 88  | lambosy     | 140 | miola      | 192 | madomoke        |
| 37 | johary      | 89  | tratra      | 141 | miantsa    | 193 | madoso          |
| 38 | olo         | 90  | fo          | 142 | misa       | 194 | le              |
| 39 | aja         | 91  | ate         | 143 | mihafy     | 195 | maike           |
| 40 | valy        | 92  | mihino      | 144 | mikororosy | 196 | mete            |
| 41 | valy        | 93  | homa        | 145 | mandre     | 197 | marineke        |
| 42 | nene        | 94  | magnehitse  | 146 | mitsoke    | 198 | lavitse         |
| 43 | baba        | 95  | minono      | 147 | masoandro  | 199 | ankavana        |
| 44 | tsiboko     | 96  | mandrehoke  | 148 | zavavola   | 200 | ankavia         |
| 45 | fia         | 97  | mandoa      | 149 | basia      | 201 | agne            |
| 46 | voron       | 98  | mitsoke     | 150 | rano       | 202 | anaty           |
| 47 | alika       | 99  | miai        | 151 | ora        | 203 | misondry        |
| 48 | hao         | 100 | mihehe      | 152 | vavarano   | 204 | miakake         |
| 49 | bibilava    | 101 | mahita      | 153 | ranovory   | 205 | raha            |
| 50 | soko        | 102 | mijanjanjy  | 154 | ranosira   | 206 | bosatra         |
| 51 | hazo        | 103 | mahay       | 155 | manovarano | 207 | agnara          |
| 52 | ala         | 104 | mandrineke  | 156 | vato       |     |                 |



**7 - Betsimisaraka (Antalaha)**

|    |            |     |               |     |              |     |                 |
|----|------------|-----|---------------|-----|--------------|-----|-----------------|
| 1  | zaho       | 53  | kobay         | 105 | maharegny    | 157 | alagnana        |
| 2  | anao       | 54  | voankazo      | 106 | matahotro    | 158 | laposiera       |
| 3  | izy        | 55  | voany         | 107 | mandry       | 159 | tany            |
| 4  | atsika     | 56  | raviny        | 108 | velogno      | 160 | rondro          |
| 5  | andre      | 57  | vahany        | 109 | maty         | 161 | zavogno         |
| 6  | zareo      | 58  | hoditrykakazo | 110 | mamono       | 162 | lagnitry        |
| 7  | ity        | 59  | folera        | 111 | miady        | 163 | rivotro         |
| 8  | izegny     | 60  | ahitry        | 112 | mangorogno   | 164 | lanaizy         |
| 9  | aketo      | 61  | tady          | 113 | mamopoko     | 165 | gilasy          |
| 10 | ary        | 62  | hoditry       | 114 | mandidy      | 166 | hemboko         |
| 11 | izovy      | 63  | haina         | 115 | mamaky       | 167 | afo             |
| 12 | ino        | 64  | lio           | 116 | manombo kiso | 168 | jofo            |
| 13 | akaiza     | 65  | taholagna     | 117 | magnisiky    | 169 | magnoro         |
| 14 | afiriagna  | 66  | vondraka      | 118 | mangady      | 170 | lalagna         |
| 15 | manankory  | 67  | atody         | 119 | milomagno    | 171 | tanety          |
| 16 | aza        | 68  | tandroko      | 120 | magnembagna  | 172 | mena            |
| 17 | jiaby      | 69  | rambo         | 121 | mandeha      | 173 | mahitso         |
| 18 | maro       | 70  | volovolo      | 122 | avy          | 174 | hasaka          |
| 19 | vitsivitsy | 71  | vorondoha     | 123 | mandry       | 175 | fotsy           |
| 20 | hely       | 72  | loha          | 124 | mantotry     | 176 | mahintigny      |
| 21 | hafa       | 73  | tadigny       | 125 | mitsangagna  | 177 | aligny          |
| 22 | araiky     | 74  | maso          | 126 | mihodigny    | 178 | andro           |
| 23 | aroa       | 75  | orogno        | 127 | lavo         | 179 | taogno          |
| 24 | telo       | 76  | vava          | 128 | magnamia     | 180 | mafana          |
| 25 | efatra     | 77  | nify          | 129 | mitagna      | 181 | manintsy        |
| 26 | dimy       | 78  | lela          | 130 | mangala      | 182 | feny            |
| 27 | maventy    | 79  | angofo        | 131 | mandrokotro  | 183 | vaovao          |
| 28 | lava       | 80  | tongotro      | 132 | manasa       | 184 | antitry         |
| 29 | malalaka   | 81  | peky          | 133 | mamitry      | 185 | tsara           |
| 30 | matevigny  | 82  | lohalitry     | 134 | mitifitry    | 186 | ratsy           |
| 31 | mavesatra  | 83  | tagnana       | 135 | manosiky     | 187 | lo              |
| 32 | hely       | 84  | elatra        | 136 | mitoraka     | 188 | maloto          |
| 33 | fohy       | 85  | votraka       | 137 | manohy       | 189 | mahitsy         |
| 34 | mahety     | 86  | tsinay        | 138 | manjaitry    | 190 | boribory        |
| 35 | matify     | 87  | vozogno       | 139 | mikonty      | 191 | marangitry      |
| 36 | viavy      | 88  | tahezagna     | 140 | mivolagna    | 192 | dofoko          |
| 37 | lalahy     | 89  | tratra        | 141 | mihira       | 193 | malambadambatra |
| 38 | olo        | 90  | fo            | 142 | misoma       | 194 | legny           |
| 39 | zaza       | 91  | aty           | 143 | mitsilay     | 195 | maigny          |
| 40 | vady       | 92  | migiaka       | 144 | mivalagna    | 196 | mety            |
| 41 | vady       | 93  | mihinagna     | 145 | mivaingagna  | 197 | marikitry       |
| 42 | reny       | 94  | magnekitry    | 146 | mibontaka    | 198 | lavitry         |
| 43 | baba       | 95  | minono        | 147 | masova       | 199 | ankavanagna     |
| 44 | biby       | 96  | mihaka        | 148 | davolagna    | 200 | ankavia         |
| 45 | laoko      | 97  | mandoa        | 149 | lakintagna   | 201 | agny            |
| 46 | vorogno    | 98  | mifiko        | 150 | rano         | 202 | agnaty          |
| 47 | amboa      | 99  | miaigny       | 151 | oragna       | 203 | miaraka         |
| 48 | hao        | 100 | mimoehy       | 152 | tegnarano    | 204 | ndraiky         |
| 49 | bibilava   | 101 | mahita        | 153 | matsabory    | 205 | izy ka          |
| 50 | hankagna   | 102 | mitandregny   | 154 | ranomasigny  | 206 | satria          |
| 51 | kakazo     | 103 | mahay         | 155 | sira         | 207 | agnaragna       |
| 52 | atiala     | 104 | mieritreritry | 156 | vato         |     |                 |

## 8 - Merina (Antananarivo)

|    |            |     |               |     |                   |     |                |
|----|------------|-----|---------------|-----|-------------------|-----|----------------|
| 1  | izaho      | 53  | kibay         | 105 | manimbolo         | 157 | fasika         |
| 2  | ianao      | 54  | voankazo      | 106 | matahotra         | 158 | vovoka         |
| 3  | izy        | 55  | voa           | 107 | matory            | 159 | tany           |
| 4  | isika      | 56  | ravina        | 108 | velona            | 160 | rahona         |
| 5  | ianareo    | 57  | faka          | 109 | maty              | 161 | zavona         |
| 6  | izy ireo   | 58  | hodikazo      | 110 | mamono            | 162 | lanitra        |
| 7  | ity        | 59  | voninkazo     | 111 | miady             | 163 | rivotra        |
| 8  | izany      | 60  | ahitra        | 112 | mihaza            | 164 | ranomandry     |
| 9  | eto        | 61  | tady          | 113 | mikapoka          | 165 | ranomandry     |
| 10 | ao         | 62  | hoditra       | 114 | mandidy           | 166 | setroka        |
| 11 | iza        | 63  | hena          | 115 | mamaky            | 167 | afo            |
| 12 | inona      | 64  | ra            | 116 | manatsatoka antsy | 168 | lavenona       |
| 13 | aiza       | 65  | taolana       | 117 | mikiky            | 169 | mandoro        |
| 14 | oviana     | 66  | taviny        | 118 | mangady           | 170 | lalana         |
| 15 | ahoana     | 67  | atody         | 119 | milomano          | 171 | tendrombohitra |
| 16 | tsy        | 68  | tandroka      | 120 | manidina          | 172 | mena           |
| 17 | rehetra    | 69  | rambo         | 121 | mandeha           | 173 | maitso         |
| 18 | betsaka    | 70  | volomborona   | 122 | avy               | 174 | mavo           |
| 19 | vitsivitsy | 71  | volo          | 123 | mandry            | 175 | fotsy          |
| 20 | kely       | 72  | loha          | 124 | mipetraka         | 176 | mainty         |
| 21 | hafa       | 73  | sofina        | 125 | mitsangana        | 177 | alina          |
| 22 | iray       | 74  | maso          | 126 | mihodina          | 178 | andro          |
| 23 | roa        | 75  | orona         | 127 | mianjera          | 179 | taona          |
| 24 | telo       | 76  | vava          | 128 | manome            | 180 | mafana         |
| 25 | efatra     | 77  | nify          | 129 | mitantana         | 181 | mangatsiaka    |
| 26 | dimy       | 78  | lela          | 130 | manery            | 182 | feny           |
| 27 | lehibe     | 79  | hoho          | 131 | manakasoka        | 183 | vaovao         |
| 28 | lava       | 80  | tongotra      | 132 | manasa            | 184 | antitra        |
| 29 | malalaka   | 81  | ranjo         | 133 | mamafa            | 185 | tsara          |
| 30 | matevina   | 82  | lohalika      | 134 | mitifitra         | 186 | ratsy          |
| 31 | mavesatra  | 83  | tanana        | 135 | manosika          | 187 | lo             |
| 32 | kely       | 84  | elatra        | 136 | manoraka          | 188 | maloto         |
| 33 | fohy       | 85  | kibo          | 137 | mamehy            | 189 | mahitsy        |
| 34 | tery       | 86  | tsinay        | 138 | manjaitra         | 190 | boribory       |
| 35 | manify     | 87  | vozona        | 139 | manisa            | 191 | maranitra      |
| 36 | vehivavy   | 88  | lamosina      | 140 | milaza            | 192 | dombo          |
| 37 | lehilahy   | 89  | tratra        | 141 | mihira            | 193 | malama         |
| 38 | olona      | 90  | fo            | 142 | milalao           | 194 | mando          |
| 39 | zaza       | 91  | aty           | 143 | mitsinkafona      | 195 | maina          |
| 40 | vady       | 92  | misotro       | 144 | mikoriana         | 196 | mety           |
| 41 | vady       | 93  | mihinana      | 145 | mandry            | 197 | akaiky         |
| 42 | reny       | 94  | manaikitra    | 146 | mibontsina        | 198 | lavitra        |
| 43 | ray        | 95  | mifiaka       | 147 | masoandro         | 199 | havanana       |
| 44 | biby       | 96  | mandrehoka    | 148 | volana            | 200 | havia          |
| 45 | trondro    | 97  | mandoa        | 149 | kintana           | 201 | any            |
| 46 | vorona     | 98  | mitsoka       | 150 | rano              | 202 | anaty          |
| 47 | alika      | 99  | miaina        | 151 | orana             | 203 | amin ny        |
| 48 | hao        | 100 | mihomehy      | 152 | renirano          | 204 | sy             |
| 49 | bibilava   | 101 | mahita        | 153 | farihy            | 205 | raha           |
| 50 | kankana    | 102 | mihaino       | 154 | ranomasina        | 206 | satria         |
| 51 | hazo       | 103 | mahay         | 155 | sira              | 207 | anarana        |
| 52 | ala        | 104 | mieritreritra | 156 | vato              |     |                |

**9 - Bara (Betroka)**

|    |           |     |               |     |                |     |            |
|----|-----------|-----|---------------|-----|----------------|-----|------------|
| 1  | iaho      | 53  | kobay         | 105 | magnembo       | 157 | fasy       |
| 2  | henao     | 54  | voakazo       | 106 | matahotsy      | 158 | bo         |
| 3  | izy       | 55  | voa           | 107 | mandry         | 159 | tany       |
| 4  | itsika    | 56  | ravy          | 108 | velo           | 160 | raho       |
| 5  | henareo   | 57  | faka          | 109 | maty           | 161 | zavo       |
| 6  | reo       | 58  | hodikazo      | 110 | mamono         | 162 | lagnitsy   |
| 7  | ity       | 59  | vonikazo      | 111 | miady          | 163 | tsioky     |
| 8  | zay       | 60  | akata         | 112 | miremby        | 164 | zavo       |
| 9  | etoa      | 61  | tady          | 113 | mamofoky       | 165 | ranomandry |
| 10 | ao        | 62  | hoditry       | 114 | manapaky       | 166 | setroky    |
| 11 | ia        | 63  | hena          | 115 | manilaky       | 167 | afo        |
| 12 | ino       | 64  | lio           | 116 | mitomboky mesa | 168 | lakevo     |
| 13 | aia       | 65  | tola          | 117 | mikihy         | 169 | magnoro    |
| 14 | ombia     | 66  | sabora        | 118 | mihady         | 170 | lala       |
| 15 | akory     | 67  | atody         | 119 | milagno        | 171 | vohitsy    |
| 16 | tsy       | 68  | tsifa         | 120 | magnembo       | 172 | mena       |
| 17 | aby       | 69  | ohiny         | 121 | mandeha        | 173 | metso      |
| 18 | lako      | 70  | volomboro     | 122 | avy            | 174 | vogny      |
| 19 | kidikidy  | 71  | volo          | 123 | mandry         | 175 | fotsy      |
| 20 | kidy      | 72  | loha          | 124 | mitoboky       | 176 | mety       |
| 21 | hafa      | 73  | sofy          | 125 | mitsanga       | 177 | hariva     |
| 22 | raiky     | 74  | maso          | 126 | mitodiky       | 178 | andro      |
| 23 | roy       | 75  | oro           | 127 | lavo           | 179 | tao        |
| 24 | telo      | 76  | vava          | 128 | magnome        | 180 | mafana     |
| 25 | efatsy    | 77  | nify          | 129 | mita           | 181 | manitsy    |
| 26 | dimy      | 78  | lela          | 130 | mamiaky        | 182 | atsiky     |
| 27 | foloay    | 79  | vazakoho      | 131 | mampikasoky    | 183 | vao        |
| 28 | abo       | 80  | tomboky       | 132 | manasa         | 184 | antitsy    |
| 29 | malalaky  | 81  | randro        | 133 | mamafa         | 185 | soa        |
| 30 | matevy    | 82  | pokopoko      | 134 | mitifitsy      | 186 | ratsy      |
| 31 | mavesatry | 83  | tagna         | 135 | mandrosy       | 187 | lo         |
| 32 | kidy      | 84  | elatsy        | 136 | manoraky       | 188 | maloto     |
| 33 | bory      | 85  | troky         | 137 | mamatotsy      | 189 | mahitsy    |
| 34 | tery      | 86  | tsinay        | 138 | mitrebiky      | 190 | boribory   |
| 35 | matify    | 87  | vozo          | 139 | magnisaky      | 191 | maragnitsy |
| 36 | apela     | 88  | lambosy       | 140 | miroho         | 192 | do         |
| 37 | lilahy    | 89  | tratra        | 141 | miantsa        | 193 | malama     |
| 38 | olo       | 90  | fo            | 142 | mihira         | 194 | mando      |
| 39 | zaza      | 91  | aty           | 143 | mihefo         | 195 | maiky      |
| 40 | vady      | 92  | mino          | 144 | mandeha        | 196 | mety       |
| 41 | vady      | 93  | homa          | 145 | mandry         | 197 | mariny     |
| 42 | iendry    | 94  | magnehitsy    | 146 | mivonto        | 198 | lavitsy    |
| 43 | iaba      | 95  | mitsetsiky    | 147 | masoandro      | 199 | havana     |
| 44 | biby      | 96  | mandrora      | 148 | vola           | 200 | havia      |
| 45 | fia       | 97  | mandoa        | 149 | vasia          | 201 | agny       |
| 46 | voron     | 98  | mitsioky      | 150 | rano           | 202 | agnaty     |
| 47 | ambo      | 99  | miay          | 151 | ora            | 203 | amin ny    |
| 48 | hao       | 100 | homehy        | 152 | vavarano       | 204 | da         |
| 49 | bibilava  | 101 | mahita        | 153 | farihy         | 205 | laha       |
| 50 | haka      | 102 | mahare        | 154 | riaky          | 206 | satria     |
| 51 | hazo      | 103 | mahay         | 155 | sira           | 207 | agnara     |
| 52 | ala       | 104 | mieritseritsy | 156 | vato           |     |            |

## 10 - Zafisoro (Farafangana)

|    |             |     |                |     |                   |     |            |
|----|-------------|-----|----------------|-----|-------------------|-----|------------|
| 1  | iao         | 53  | kaboda         | 105 | mifofogny         | 157 | fasiky     |
| 2  | anao        | 54  | vokazo         | 106 | matahotry         | 158 | bo         |
| 3  | izy         | 55  | isiny          | 107 | matory            | 159 | tany       |
| 4  | itsika      | 56  | ravy           | 108 | velogny           | 160 | mika       |
| 5  | anareo      | 57  | vatry          | 109 | afak aigny        | 161 | zavogny    |
| 6  | izy aby     | 58  | hoditrazo      | 110 | mamono            | 162 | lagnitry   |
| 7  | itiky       | 59  | voninkazo      | 111 | miady             | 163 | rivotry    |
| 8  | iza         | 60  | hasitry        | 112 | miremby           | 164 | ranomandry |
| 9  | etoa        | 61  | tady           | 113 | mandaboky         | 165 | ranomandry |
| 10 | amignao     | 62  | hoditry        | 114 | manapaky          | 166 | teroky     |
| 11 | ia          | 63  | hena           | 115 | mamaky            | 167 | afo        |
| 12 | ino         | 64  | ra             | 116 | mapitraoaky amesa | 168 | lakevo     |
| 13 | aia         | 65  | tola           | 117 | mikikitry         | 169 | magnoro    |
| 14 | ovia        | 66  | saborany       | 118 | mangady           | 170 | lalagny    |
| 15 | magnino     | 67  | atody          | 119 | milomagno         | 171 | vohitry    |
| 16 | tsy         | 68  | tandroky       | 120 | magnembogny       | 172 | mena       |
| 17 | aby         | 69  | ohy            | 121 | mandeha           | 173 | metso      |
| 18 | maro        | 70  | volomboro      | 122 | avy               | 174 | makamaka   |
| 19 | kidikidy    | 71  | volo           | 123 | matory            | 175 | fotsy      |
| 20 | pitiky      | 72  | loha           | 124 | midoboky          | 176 | mity       |
| 21 | hafa        | 73  | sofy           | 125 | mitsanga          | 177 | ariva      |
| 22 | raiky       | 74  | maso           | 126 | mihodigny         | 178 | andro      |
| 23 | roy         | 75  | vatagnoro      | 127 | latsaky           | 179 | taogny     |
| 24 | telo        | 76  | vava           | 128 | magnome           | 180 | may        |
| 25 | efatra      | 77  | nify           | 129 | mitagny           | 181 | mangatseky |
| 26 | dimy        | 78  | lela           | 130 | mipitsa           | 182 | feny       |
| 27 | zakabe      | 79  | vazakoho       | 131 | mikosiky          | 183 | vao        |
| 28 | lava        | 80  | tomboky        | 132 | manasa            | 184 | mavozo     |
| 29 | malalaky    | 81  | randro         | 133 | mamafa            | 185 | tsara      |
| 30 | matevy      | 82  | laditry        | 134 | mitifitry         | 186 | ratsy      |
| 31 | mavesatry   | 83  | tagna          | 135 | manolaky          | 187 | mavao      |
| 32 | pitiky      | 84  | elatry         | 136 | mitoraky          | 188 | maloto     |
| 33 | botry       | 85  | troky          | 137 | mamatotry         | 189 | mahitsy    |
| 34 | pitsa       | 86  | oliky          | 138 | manjaitry         | 190 | boribory   |
| 35 | manify      | 87  | vozo           | 139 | magnisa           | 191 | maragnitry |
| 36 | viavy       | 88  | lamosy         | 140 | mizaka            | 192 | bofoky     |
| 37 | lela        | 89  | tratra         | 141 | mihira            | 193 | malama     |
| 38 | olo         | 90  | fo             | 142 | mihira            | 194 | lendegny   |
| 39 | marao       | 91  | aty            | 143 | mitsingevaheva    | 195 | maigny     |
| 40 | vady        | 92  | mindrano       | 144 | mandeha           | 196 | izay       |
| 41 | vady        | 93  | minagny        | 145 | mandry            | 197 | akeky      |
| 42 | endry       | 94  | magnekitry     | 146 | mivonto           | 198 | lavitra    |
| 43 | aba         | 95  | mameky         | 147 | masoandro         | 199 | akavana    |
| 44 | biby        | 96  | mandoha rehoky | 148 | volagny           | 200 | akavia     |
| 45 | laokandrano | 97  | mandoa         | 149 | vasia             | 201 | agny       |
| 46 | voron       | 98  | misotry        | 150 | rano              | 202 | agnaty     |
| 47 | amboa       | 99  | miaigny        | 151 | erikandro         | 203 | amin ny    |
| 48 | hao         | 100 | mihehy         | 152 | renirano          | 204 | sy         |
| 49 | bibilava    | 101 | mahita         | 153 | ranodobo          | 205 | ra         |
| 50 | aka         | 102 | miteno         | 154 | ranomasy          | 206 | satria     |
| 51 | hazo        | 103 | mahalala       | 155 | sira              | 207 | agnara     |
| 52 | ala         | 104 | mandiniky      | 156 | vato              |     |            |

**11 - Betsimisaraka (Fenoarivo-Est)**

|    |            |     |                  |     |               |     |             |
|----|------------|-----|------------------|-----|---------------|-----|-------------|
| 1  | zaho       | 53  | vely             | 105 | mioroko       | 157 | fasiky      |
| 2  | ana        | 54  | vihindraha       | 106 | matahotro     | 158 | vovoko      |
| 3  | izy        | 55  | ambeko           | 107 | mandry        | 159 | tany        |
| 4  | antsika    | 56  | ravindraha       | 108 | velogno       | 160 | rahogno     |
| 5  | anare      | 57  | vahiny           | 109 | maty          | 161 | zavogno     |
| 6  | zare       | 58  | hodikakazo       | 110 | mamono        | 162 | lagnitry    |
| 7  | ito        | 59  | folera           | 111 | miady         | 163 | rivotro     |
| 8  | irohony    | 60  | ahitry           | 112 | mihaza        | 164 | gilasy      |
| 9  | aketo      | 61  | afotro           | 113 | mamely        | 165 | gilasy      |
| 10 | aka        | 62  | hoditry          | 114 | manapaka      | 166 | emboko      |
| 11 | izovy      | 63  | ambomaty         | 115 | mamaky        | 167 | afo         |
| 12 | ino        | 64  | ra               | 116 | manombo kiso  | 168 | jofo        |
| 13 | aiza       | 65  | tolagna          | 117 | magnisiky     | 169 | magnoro     |
| 14 | oviagna    | 66  | matavy           | 118 | mangady       | 170 | lalagna     |
| 15 | karakory   | 67  | atody            | 119 | milomagno     | 171 | tanety      |
| 16 | tsy        | 68  | tandroko         | 120 | magnembana    | 172 | mena        |
| 17 | jiaby      | 69  | volombody        | 121 | mandeha       | 173 | maitso      |
| 18 | fontry     | 70  | volovolomborogno | 122 | havy          | 174 | mavo        |
| 19 | vitsivitsy | 71  | vorondoha        | 123 | mandry        | 175 | fotsy       |
| 20 | hely       | 72  | loha             | 124 | mantotry      | 176 | maintigny   |
| 21 | hafa       | 73  | tadigny          | 125 | mitsangagna   | 177 | androaligny |
| 22 | araiky     | 74  | maso             | 126 | mihodigny     | 178 | andro       |
| 23 | aro        | 75  | orogno           | 127 | lavo          | 179 | tono        |
| 24 | telo       | 76  | vava             | 128 | magnamia      | 180 | mafana      |
| 25 | efatra     | 77  | nify             | 129 | mitantagna    | 181 | mangatsiaka |
| 26 | dimy       | 78  | lela             | 130 | malaka        | 182 | feno        |
| 27 | maventy    | 79  | angofo           | 131 | mampikasiky   | 183 | vaovao      |
| 28 | lava       | 80  | hongotro         | 132 | manasa        | 184 | antitry     |
| 29 | malalaka   | 81  | vavitsy          | 133 | mamafa        | 185 | tsara       |
| 30 | matevigny  | 82  | lohalitry        | 134 | mitifitry     | 186 | ratsy       |
| 31 | mavesatra  | 83  | tagnagna         | 135 | manosiky      | 187 | lo          |
| 32 | hely       | 84  | elatra           | 136 | manoraka      | 188 | maloto      |
| 33 | fohy       | 85  | kibo             | 137 | mamehy        | 189 | mahitsy     |
| 34 | mahety     | 86  | tsinay           | 138 | manjaitry     | 190 | boribory    |
| 35 | manify     | 87  | tenda            | 139 | magnisa       | 191 | marangitry  |
| 36 | viavy      | 88  | tahezagna        | 140 | mivolagna     | 192 | malomogno   |
| 37 | lalahy     | 89  | tratra           | 141 | mihira        | 193 | malamatra   |
| 38 | ologno     | 90  | fo               | 142 | midola        | 194 | boka        |
| 39 | zaza       | 91  | aty              | 143 | mitsingevagna | 195 | maigny      |
| 40 | vady       | 92  | mino             | 144 | magnoriky     | 196 | manjary     |
| 41 | vady       | 93  | homagna          | 145 | mandry        | 197 | mariny      |
| 42 | niny       | 94  | magnekitry       | 146 | mibontsigny   | 198 | lavitry     |
| 43 | baba       | 95  | minono           | 147 | masoandro     | 199 | ankavanagna |
| 44 | biby       | 96  | mihaka           | 148 | davolagna     | 200 | ankavia     |
| 45 | loko       | 97  | mandoa           | 149 | kintagna      | 201 | agny        |
| 46 | vorogno    | 98  | mitsotro         | 150 | rano          | 202 | agnatiny    |
| 47 | kiva       | 99  | miaigny          | 151 | oragnandro    | 203 | miaraka     |
| 48 | ho         | 100 | mimoehy          | 152 | renirano      | 204 | sy          |
| 49 | bibilava   | 101 | mahita           | 153 | dobo          | 205 | raha        |
| 50 | hankagna   | 102 | mitandregny      | 154 | ranomasigny   | 206 | satria      |
| 51 | kakazo     | 103 | mahe             | 155 | sira          | 207 | agnaragna   |
| 52 | atiala     | 104 | mieritreritry    | 156 | vato          |     |             |

**12 - Betsileo (Fianarantsoa)**

|    |           |     |               |     |                   |     |               |
|----|-----------|-----|---------------|-----|-------------------|-----|---------------|
| 1  | aho       | 53  | tehigna       | 105 | mifofona          | 157 | fasika        |
| 2  | agnao     | 54  | voankazo      | 106 | matahotsa         | 158 | vovoka        |
| 3  | i         | 55  | voa           | 107 | matory            | 159 | tany          |
| 4  | tsika     | 56  | ravina        | 108 | velogna           | 160 | rahogna       |
| 5  | agnareo   | 57  | fakany        | 109 | maty              | 161 | zavona        |
| 6  | reo       | 58  | hodikazo      | 110 | mamono            | 162 | lagnitsa      |
| 7  | itito     | 59  | voninkazo     | 111 | miady             | 163 | rivotsa       |
| 8  | zany      | 60  | ahitsa        | 112 | miagnala          | 164 | ranomandry    |
| 9  | eto       | 61  | tady          | 113 | mikapoka          | 165 | ranomandry    |
| 10 | ao        | 62  | hoditsa       | 114 | mandidy           | 166 | setroka       |
| 11 | ia        | 63  | hena          | 115 | mamaky            | 167 | afo           |
| 12 | ino       | 64  | ra            | 116 | manatsatoka antsy | 168 | lavenona      |
| 13 | aia       | 65  | taolagna      | 117 | mikiky            | 169 | magnoro       |
| 14 | oviana    | 66  | taviny        | 118 | mangady           | 170 | lalagna       |
| 15 | ahoana    | 67  | atody         | 119 | milomagno         | 171 | tendrobohitsa |
| 16 | tsa       | 68  | tandroka      | 120 | mitsidina         | 172 | mena          |
| 17 | aby       | 69  | rambo         | 121 | mandeha           | 173 | maintso       |
| 18 | be        | 70  | volomborona   | 122 | avy               | 174 | mavo          |
| 19 | malalagna | 71  | volondoha     | 123 | mandrimandry      | 175 | fotsy         |
| 20 | kely      | 72  | loha          | 124 | mitoatsa          | 176 | mainty        |
| 21 | hafa      | 73  | sofina        | 125 | mitsangana        | 177 | aligna        |
| 22 | raika     | 74  | maso          | 126 | mihodina          | 178 | andro         |
| 23 | roa       | 75  | orogna        | 127 | migetraka         | 179 | taolagna      |
| 24 | telo      | 76  | vava          | 128 | manome            | 180 | mafana        |
| 25 | efatsa    | 77  | nify          | 129 | mitantagna        | 181 | manara        |
| 26 | dimy      | 78  | lela          | 130 | mitery            | 182 | feny          |
| 27 | ngeza     | 79  | hoho          | 131 | mikiky            | 183 | vaovao        |
| 28 | lava      | 80  | tongotsa      | 132 | manasa            | 184 | antitsa       |
| 29 | malalaka  | 81  | ranjo         | 133 | mamafa            | 185 | soa           |
| 30 | matevigna | 82  | lohalika      | 134 | mitifitsa         | 186 | ratsy         |
| 31 | mavesatsa | 83  | tagnana       | 135 | manosika          | 187 | lo            |
| 32 | kely      | 84  | elatsa        | 136 | mitoraka          | 188 | maloto        |
| 33 | bory      | 85  | troka         | 137 | mamehy            | 189 | mahitsy       |
| 34 | tery      | 86  | tsinay        | 138 | manjaitra         | 190 | boribory      |
| 35 | manify    | 87  | vozogna       | 139 | magnisa           | 191 | maragnitsa    |
| 36 | ampela    | 88  | lamosigna     | 140 | mitarogna         | 192 | dombo         |
| 37 | lehilahy  | 89  | tratra        | 141 | mihira            | 193 | malama        |
| 38 | olo       | 90  | fo            | 142 | miregnina         | 194 | mando         |
| 39 | kilonga   | 91  | aty           | 143 | mitsinkafona      | 195 | maigna        |
| 40 | vady      | 92  | misotro       | 144 | mitete            | 196 | mety          |
| 41 | vady      | 93  | mihinana      | 145 | mandry            | 197 | mariny        |
| 42 | reny      | 94  | magnehitsa    | 146 | mibontsina        | 198 | lavitsa       |
| 43 | ray       | 95  | minono        | 147 | masoandro         | 199 | havana        |
| 44 | biby      | 96  | mandrehoka    | 148 | volagna           | 200 | havia         |
| 45 | trondro   | 97  | mandoa        | 149 | kintagna          | 201 | agny          |
| 46 | vorogna   | 98  | mitsoka       | 150 | rano              | 202 | agnaty        |
| 47 | amboa     | 99  | miaigna       | 151 | oragna            | 203 | amin ny       |
| 48 | hao       | 100 | mihehy        | 152 | renirano          | 204 | sy            |
| 49 | bibilava  | 101 | mahita        | 153 | farihy            | 205 | lehe          |
| 50 | kankana   | 102 | mitaino       | 154 | ranomasina        | 206 | satria        |
| 51 | hazo      | 103 | mahay         | 155 | sira              | 207 | agnarana      |
| 52 | ala       | 104 | mieritseritsa | 156 | vato              |     |               |

### 13 - Betsimisaraka (Mahanoro)

|    |            |     |               |     |                 |     |                 |
|----|------------|-----|---------------|-----|-----------------|-----|-----------------|
| 1  | zaho       | 53  | fioka         | 105 | miorogna        | 157 | fasika          |
| 2  | ano        | 54  | vonkanzo      | 106 | vaka            | 158 | vovoka          |
| 3  | izy        | 55  | vihy          | 107 | mandry          | 159 | fotaka          |
| 4  | antsena    | 56  | ravina        | 108 | velogno         | 160 | rahona          |
| 5  | andreo     | 57  | vahatra       | 109 | diso            | 161 | zavona          |
| 6  | zareo      | 58  | oditra kakazo | 110 | mamono          | 162 | lagnitra        |
| 7  | itogna     | 59  | folera        | 111 | miady           | 163 | rivotra         |
| 8  | indrogna   | 60  | ahitra        | 112 | miaza           | 164 | avandra         |
| 9  | aketo      | 61  | tady          | 113 | mamango         | 165 | ranomandry      |
| 10 | ako        | 62  | oditra        | 114 | manapaka        | 166 | mifoka          |
| 11 | zovy       | 63  | hena          | 115 | mizara          | 167 | afo             |
| 12 | ino        | 64  | ra            | 116 | manomboka antsy | 168 | lavenona        |
| 13 | akeza      | 65  | tolagna       | 117 | mandoditra      | 169 | mandoro         |
| 14 | oviana     | 66  | menagny       | 118 | angady          | 170 | lalana          |
| 15 | karakory   | 67  | atody         | 119 | mandagno        | 171 | tavirana        |
| 16 | tsy        | 68  | tandroka      | 120 | mirigna         | 172 | mena            |
| 17 | ziaby      | 69  | volombody     | 121 | mandeha         | 173 | meso            |
| 18 | fatatra    | 70  | volomborogna  | 122 | tonga           | 174 | mavo            |
| 19 | visivisy   | 71  | randrana      | 123 | mandry          | 175 | fosy            |
| 20 | bitika     | 72  | loha          | 124 | mipetraka       | 176 | mintina         |
| 21 | afa        | 73  | tadigny       | 125 | mitsangana      | 177 | alina           |
| 22 | reka       | 74  | maso          | 126 | miodigna        | 178 | andro           |
| 23 | roa        | 75  | orona         | 127 | lavo            | 179 | tona            |
| 24 | telo       | 76  | vava          | 128 | magnomia        | 180 | mafana          |
| 25 | efatra     | 77  | nify          | 129 | mitantana       | 181 | mangasiaka      |
| 26 | dimy       | 78  | lela          | 130 | mamia           | 182 | feny            |
| 27 | maventy    | 79  | angofo        | 131 | mikosoka        | 183 | vo              |
| 28 | lava       | 80  | tongotra      | 132 | manasa          | 184 | antitra         |
| 29 | matahitra  | 81  | vovisy        | 133 | mamafa          | 185 | sara            |
| 30 | matevina   | 82  | lohalitra     | 134 | mitifitra       | 186 | rasy            |
| 31 | mavesatra  | 83  | tagnana       | 135 | manosika        | 187 | lo              |
| 32 | bitika     | 84  | elatra        | 136 | mambalavala     | 188 | maloto          |
| 33 | fohika     | 85  | kibo          | 137 | mamatotra       | 189 | mahisy          |
| 34 | tery       | 86  | tsine         | 138 | manjetra        | 190 | boribory        |
| 35 | manify     | 87  | ambozogna     | 139 | magnisa         | 191 | marangitra      |
| 36 | viavy      | 88  | tombokoka     | 140 | mizaka          | 192 | malombona       |
| 37 | lilahy     | 89  | tratra        | 141 | mihira          | 193 | malama          |
| 38 | olona      | 90  | fo            | 142 | milalo          | 194 | mando           |
| 39 | zamadinika | 91  | aty           | 143 | miempo          | 195 | megna           |
| 40 | vady       | 92  | midroka       | 144 | mandeha         | 196 | aminanzy        |
| 41 | vady       | 93  | mihinana      | 145 | mandry          | 197 | marivo          |
| 42 | mama       | 94  | magnekitra    | 146 | mivonto         | 198 | lavitra         |
| 43 | baba       | 95  | minono        | 147 | masoandro       | 199 | ankavanana      |
| 44 | biby       | 96  | mandreoka     | 148 | volana          | 200 | avia            |
| 45 | laoka      | 97  | mandoa        | 149 | kintana         | 201 | agny            |
| 46 | vorogna    | 98  | misotra       | 150 | rano            | 202 | agnaty          |
| 47 | kiva       | 99  | miegna        | 151 | oranandro       | 203 | miaraka amin ny |
| 48 | ao         | 100 | mimehy        | 152 | siragnana       | 204 | ombanin ny      |
| 49 | bibilava   | 101 | mahita        | 153 | farihy          | 205 | raha            |
| 50 | viky       | 102 | miteno        | 154 | ranomasigna     | 206 | satria          |
| 51 | kakazo     | 103 | mahe          | 155 | sira            | 207 | agnaragna       |
| 52 | atiala     | 104 | mieritreritra | 156 | vato            |     |                 |

**14 - Sakalava (Maintirano)**

|    |          |     |               |     |                |     |            |
|----|----------|-----|---------------|-----|----------------|-----|------------|
| 1  | zaho     | 53  | kobay         | 105 | magnimbo       | 157 | fasiky     |
| 2  | iha      | 54  | voankazo      | 106 | matahotsy      | 158 | lemboky    |
| 3  | i        | 55  | masomboly     | 107 | miroro         | 159 | tany       |
| 4  | tsika    | 56  | ravy          | 108 | velo           | 160 | raho       |
| 5  | nareo    | 57  | vahitry       | 109 | maty           | 161 | zavo       |
| 6  | reo      | 58  | holikazo      | 110 | mamono         | 162 | lagnitry   |
| 7  | ity      | 59  | folera        | 111 | mialy          | 163 | tsioky     |
| 8  | iriky    | 60  | akata         | 112 | mihaza         | 164 | lagilasy   |
| 9  | eto      | 61  | taly          | 113 | mamango        | 165 | glasy      |
| 10 | ao       | 62  | holitry       | 114 | mandily        | 166 | setroky    |
| 11 | ia       | 63  | hena          | 115 | mamaky         | 167 | motro      |
| 12 | ino      | 64  | lio           | 116 | mitomboky meso | 168 | lavenoky   |
| 13 | aia      | 65  | taola         | 117 | mihaotsy       | 169 | magnoro    |
| 14 | ombia    | 66  | vondraky      | 118 | mangaly        | 170 | lala       |
| 15 | nahoa    | 67  | atoly         | 119 | milagno        | 171 | vohitse    |
| 16 | tsy      | 68  | tandroka      | 120 | magnidina      | 172 | mena       |
| 17 | iaby     | 69  | hohy          | 121 | mandeha        | 173 | maitso     |
| 18 | maro     | 70  | volomboro     | 122 | bakagny        | 174 | vogny      |
| 19 | kelikely | 71  | volo          | 123 | miroro         | 175 | foty       |
| 20 | kely     | 72  | loha          | 124 | mipetraka      | 176 | mainty     |
| 21 | hafa     | 73  | sofy          | 125 | mitsotaky      | 177 | aliky      |
| 22 | raiky    | 74  | maso          | 126 | mioliky        | 178 | andro      |
| 23 | roy      | 75  | oro           | 127 | lavo           | 179 | tao        |
| 24 | telo     | 76  | vava          | 128 | magnome        | 180 | may        |
| 25 | efatsy   | 77  | ihy           | 129 | mita           | 181 | magnitsy   |
| 26 | dimy     | 78  | lela          | 130 | mandray        | 182 | feny       |
| 27 | bevata   | 79  | angofo        | 131 | mitakosiky     | 183 | vao        |
| 28 | habo     | 80  | tongotsy      | 132 | manasa         | 184 | antitsy    |
| 29 | malalaky | 81  | randro        | 133 | mamasa         | 185 | soa        |
| 30 | matevy   | 82  | lohaliky      | 134 | mitifitsy      | 186 | raty       |
| 31 | masatsy  | 83  | tagna         | 135 | mandonjy       | 187 | mavay      |
| 32 | kely     | 84  | elatsy        | 136 | mitoraky       | 188 | maloto     |
| 33 | boribory | 85  | kibo          | 137 | mamatotsy      | 189 | mahity     |
| 34 | maletsy  | 86  | tinay         | 138 | manjaitsy      | 190 | boriboriky |
| 35 | manify   | 87  | akaiky        | 139 | magnisa        | 191 | maragnitsy |
| 36 | ampela   | 88  | lambosy       | 140 | mivola         | 192 | madomo     |
| 37 | lelahy   | 89  | tratra        | 141 | miantsa        | 193 | madojo     |
| 38 | olo      | 90  | fo            | 142 | miisa          | 194 | boboky     |
| 39 | aja      | 91  | aty           | 143 | mihafo         | 195 | maiky      |
| 40 | valy     | 92  | mino          | 144 | mikorisa       | 196 | sabona     |
| 41 | valy     | 93  | mihina        | 145 | mandriky       | 197 | akaiky     |
| 42 | neny     | 94  | manaikitsy    | 146 | mivonto        | 198 | lavitsy    |
| 43 | baba     | 95  | mitsintsiky   | 147 | masoandro      | 199 | kavana     |
| 44 | biby     | 96  | mandreoky     | 148 | boara          | 200 | havia      |
| 45 | fia      | 97  | mandoa        | 149 | basia          | 201 | agny       |
| 46 | voron    | 98  | mitsoky       | 150 | rano           | 202 | agnaty     |
| 47 | amboa    | 99  | miay          | 151 | ora            | 203 | amin ny    |
| 48 | hao      | 100 | mihehy        | 152 | ranomandeha    | 204 | sy         |
| 49 | bibilava | 101 | mijilo        | 153 | ranovory       | 205 | raha       |
| 50 | hanka    | 102 | mijanjanjy    | 154 | ranomasy       | 206 | satria     |
| 51 | hazo     | 103 | mahay         | 155 | sira           | 207 | agnara     |
| 52 | ala      | 104 | mieritreritry | 156 | vato           |     |            |



**15 - Sakalava (Mahajanga)**

|    |             |     |               |     |                  |     |            |
|----|-------------|-----|---------------|-----|------------------|-----|------------|
| 1  | zaho        | 53  | kibay         | 105 | mahatsapa        | 157 | fasika     |
| 2  | anao        | 54  | voankakazo    | 106 | mavozo           | 158 | vovoka     |
| 3  | izy         | 55  | voa           | 107 | matory           | 159 | tany       |
| 4  | tsika       | 56  | feliky        | 108 | velo             | 160 | rahona     |
| 5  | ndreo       | 57  | fotony        | 109 | naty             | 161 | zavona     |
| 6  | reo         | 58  | hodinkakazo   | 110 | mamono           | 162 | lagnitra   |
| 7  | ndreto      | 59  | folera        | 111 | miady            | 163 | rivotra    |
| 8  | igny        | 60  | katsakatsa    | 112 | mitsakaraka      | 164 | ranomandry |
| 9  | eto         | 61  | tady          | 113 | mamango          | 165 | laglasy    |
| 10 | ao          | 62  | hoditra       | 114 | manapaka         | 166 | setroka    |
| 11 | iha         | 63  | hena          | 115 | mamaky           | 167 | motro      |
| 12 | karakory    | 64  | lio           | 116 | manatsatoka meso | 168 | lavenona   |
| 13 | ahia        | 65  | taolana       | 117 | mikiky           | 169 | may        |
| 14 | ombia       | 66  | jabora        | 118 | mangady          | 170 | lalagna    |
| 15 | karakory    | 67  | atody         | 119 | milomano         | 171 | bongo      |
| 16 | tsy         | 68  | vombony       | 120 | mitily           | 172 | mena       |
| 17 | jiaby       | 69  | ohy           | 121 | mandeha          | 173 | maitso     |
| 18 | maro        | 70  | volomboro     | 122 | boaka            | 174 | mavo       |
| 19 | sasatsasany | 71  | fagneva       | 123 | mandry           | 175 | fotsy      |
| 20 | bitika      | 72  | loha          | 124 | mipetraka        | 176 | manity     |
| 21 | hafa        | 73  | sofy          | 125 | mitsangana       | 177 | matonaly   |
| 22 | raiky       | 74  | maso          | 126 | mihodina         | 178 | andro      |
| 23 | roa         | 75  | orona         | 127 | lavo             | 179 | taona      |
| 24 | telo        | 76  | vava          | 128 | manome           | 180 | mafana     |
| 25 | efatra      | 77  | nify          | 129 | mitazona         | 181 | manintsy   |
| 26 | dimy        | 78  | lela          | 130 | mipositra        | 182 | feny       |
| 27 | maventy     | 79  | hangofy       | 131 | mikasoka         | 183 | kabary     |
| 28 | lava        | 80  | tongotra      | 132 | manasa           | 184 | matohy     |
| 29 | malalaka    | 81  | ranjo         | 133 | mamafa           | 185 | tsara      |
| 30 | matevina    | 82  | lohalika      | 134 | mitifitra        | 186 | ratsy      |
| 31 | mavesatra   | 83  | tanana        | 135 | manosika         | 187 | lozitra    |
| 32 | balitika    | 84  | elatra        | 136 | manoraka         | 188 | maloto     |
| 33 | fohy        | 85  | kibo          | 137 | mamatotra        | 189 | mahitsy    |
| 34 | tery        | 86  | marombo       | 138 | mitrebiky        | 190 | boribory   |
| 35 | mahia       | 87  | vozona        | 139 | mikonty          | 191 | maranitra  |
| 36 | manangy     | 88  | lambosy       | 140 | mivola           | 192 | dombo      |
| 37 | lehilahy    | 89  | tratra        | 141 | mihira           | 193 | malamatra  |
| 38 | olo         | 90  | fo            | 142 | misoma           | 194 | lena       |
| 39 | tsaiky      | 91  | aty           | 143 | mitsingevana     | 195 | maiky      |
| 40 | vady        | 92  | migiaka       | 144 | misosa           | 196 | mety       |
| 41 | vady        | 93  | mihina        | 145 | mandrika         | 197 | marikitra  |
| 42 | mama        | 94  | manaikity     | 146 | mibontsina       | 198 | lavitra    |
| 43 | baba        | 95  | misintogna    | 147 | zova             | 199 | havanagna  |
| 44 | biby        | 96  | mandrehoka    | 148 | volana           | 200 | havia      |
| 45 | filao       | 97  | mandoa        | 149 | kintana          | 201 | a          |
| 46 | vorona      | 98  | milefa        | 150 | rano             | 202 | anatiny    |
| 47 | amboa       | 99  | mifoka        | 151 | orana            | 203 | miaraka    |
| 48 | hao         | 100 | mitokiky      | 152 | renirano         | 204 | ndreky     |
| 49 | bibilava    | 101 | mizaha        | 153 | matsabory        | 205 | izy koa    |
| 50 | kankana     | 102 | mitandregny   | 154 | ranosira         | 206 | satria     |
| 51 | kakazo      | 103 | mahay         | 155 | sira             | 207 | anarana    |
| 52 | ala         | 104 | mieritreritra | 156 | vato             |     |            |

**16 - Antaimoro (Manakara)**

|    |             |     |              |     |              |     |                |
|----|-------------|-----|--------------|-----|--------------|-----|----------------|
| 1  | iaho        | 53  | salohy       | 105 | mifofona     | 157 | fasika         |
| 2  | anao        | 54  | vokazo       | 106 | matahotra    | 158 | vovoka         |
| 3  | izy         | 55  | voa          | 107 | mandry       | 159 | tany           |
| 4  | isikana     | 56  | ravigna      | 108 | velogna      | 160 | rahogna        |
| 5  | indreo      | 57  | fakany       | 109 | maty         | 161 | zavogna        |
| 6  | indreo aby  | 58  | hodikazo     | 110 | mamono       | 162 | lagnitra       |
| 7  | ity         | 59  | vonikazo     | 111 | miady        | 163 | rivotry        |
| 8  | iry         | 60  | ahitra       | 112 | miremby      | 164 | ranomangatseka |
| 9  | eto         | 61  | tady         | 113 | mamango      | 165 | ranomandry     |
| 10 | ao          | 62  | hoditra      | 114 | manampaka    | 166 | setroka        |
| 11 | iza         | 63  | hena         | 115 | magnilaky    | 167 | afo            |
| 12 | ino         | 64  | ra           | 116 | mamira antsy | 168 | lakevogna      |
| 13 | aia         | 65  | tolagna      | 117 | mikisiky     | 169 | magnoro        |
| 14 | ovena       | 66  | vondraky     | 118 | mangady      | 170 | lalagna        |
| 15 | ahoa        | 67  | atody        | 119 | milomagno    | 171 | vohitry        |
| 16 | tsy         | 68  | tandroka     | 120 | magnembogna  | 172 | mena           |
| 17 | aby         | 69  | rambognany   | 121 | mandeha      | 173 | metso          |
| 18 | maro        | 70  | volomborogny | 122 | avy          | 174 | mavo           |
| 19 | kidikidiky  | 71  | volo         | 123 | mandry       | 175 | fotsy          |
| 20 | madinika    | 72  | loha         | 124 | midoboky     | 176 | menty          |
| 21 | hafa        | 73  | tadigny      | 125 | mitsanga     | 177 | aligny         |
| 22 | raiky       | 74  | maso         | 126 | mihodigna    | 178 | andro          |
| 23 | roy         | 75  | orogny       | 127 | lavo         | 179 | taogna         |
| 24 | telo        | 76  | vava         | 128 | magnome      | 180 | mafana         |
| 25 | efatra      | 77  | nify         | 129 | mitagna      | 181 | mangatseky     |
| 26 | dimy        | 78  | lela         | 130 | mipitsa      | 182 | feny           |
| 27 | zakabe      | 79  | vazakoho     | 131 | mikasika     | 183 | vao            |
| 28 | lava        | 80  | tongotra     | 132 | manasa       | 184 | antitry        |
| 29 | belapaka    | 81  | vovitsy      | 133 | mamafa       | 185 | tsara          |
| 30 | matevigna   | 82  | sipoko       | 134 | mitifitry    | 186 | ratsy          |
| 31 | mavesatra   | 83  | tagnana      | 135 | manosiky     | 187 | lo             |
| 32 | madinika    | 84  | elatry       | 136 | magnary      | 188 | maloto         |
| 33 | fohika      | 85  | kibo         | 137 | mamatotra    | 189 | mahitsy        |
| 34 | tery        | 86  | oliky        | 138 | manjaitra    | 190 | bory           |
| 35 | manify      | 87  | vozogny      | 139 | magnisa      | 191 | maragnitra     |
| 36 | viavy       | 88  | lamosigny    | 140 | mizaka       | 192 | bofogna        |
| 37 | lelahy      | 89  | tratra       | 141 | mihira       | 193 | malama         |
| 38 | olo         | 90  | fo           | 142 | mihira       | 194 | mando          |
| 39 | zaza        | 91  | aty          | 143 | miempo       | 195 | maigna         |
| 40 | vady        | 92  | minogny      | 144 | milentika    | 196 | aminazy        |
| 41 | vady        | 93  | mihinagna    | 145 | mivengagny   | 197 | akeky          |
| 42 | iendry      | 94  | magnekitra   | 146 | mibotsigna   | 198 | lavitra        |
| 43 | iaba        | 95  | misesitra    | 147 | masoandro    | 199 | havanana       |
| 44 | biby        | 96  | mandrehoka   | 148 | volagna      | 200 | havia          |
| 45 | laokandrano | 97  | mandoa       | 149 | kitagna      | 201 | agny           |
| 46 | vorogna     | 98  | mitsioka     | 150 | rano         | 202 | agnatiny       |
| 47 | amboa       | 99  | miaigna      | 151 | oronkandro   | 203 | amin ny        |
| 48 | hao         | 100 | mihehy       | 152 | renirano     | 204 | da             |
| 49 | bibilava    | 101 | mahita       | 153 | takebo       | 205 | raha           |
| 50 | hankana     | 102 | miteno       | 154 | ranomasigna  | 206 | satria         |
| 51 | hazo        | 103 | mahay        | 155 | sira         | 207 | agnara         |
| 52 | ala         | 104 | mandignika   | 156 | vato         |     |                |

**17 - Antambohoaka (Mananjary)**

|    |            |     |                |     |                  |     |            |
|----|------------|-----|----------------|-----|------------------|-----|------------|
| 1  | iao        | 53  | kaboda         | 105 | mifofona         | 157 | fasina     |
| 2  | anao       | 54  | voanakakazo    | 106 | mataotra         | 158 | vovoka     |
| 3  | izy        | 55  | vo             | 107 | mandry           | 159 | tany       |
| 4  | antsena    | 56  | ravina         | 108 | velogna          | 160 | rahogna    |
| 5  | anareo     | 57  | vahany         | 109 | maty             | 161 | zavogna    |
| 6  | arizareo   | 58  | hodinakakazo   | 110 | mamono           | 162 | lagnitra   |
| 7  | ity        | 59  | folera         | 111 | miady            | 163 | agnina     |
| 8  | iry        | 60  | ahitra         | 112 | mambely          | 164 | ranomandry |
| 9  | eto        | 61  | tady           | 113 | mandraboka       | 165 | ranomandry |
| 10 | ao         | 62  | hoditra        | 114 | manapaky         | 166 | zavogna    |
| 11 | iza        | 63  | hena           | 115 | mamaky           | 167 | afo        |
| 12 | ino        | 64  | ra             | 116 | manitroboka kiso | 168 | lavenona   |
| 13 | aza        | 65  | tolagna        | 117 | mikiky           | 169 | magnoro    |
| 14 | ovena      | 66  | matavy         | 118 | mangady          | 170 | lalana     |
| 15 | akory      | 67  | atody          | 119 | mandagno         | 171 | vohitra    |
| 16 | tsy        | 68  | tandroka       | 120 | miborigna        | 172 | mena       |
| 17 | izy marobe | 69  | volombody      | 121 | mandeha          | 173 | metso      |
| 18 | maro       | 70  | volona vorogna | 122 | avy              | 174 | mavo       |
| 19 | vitsivitsy | 71  | randrana       | 123 | mandry           | 175 | fotsy      |
| 20 | bitaka     | 72  | loha           | 124 | mipetraka        | 176 | minty      |
| 21 | hafa       | 73  | tadigny        | 125 | mitsangana       | 177 | hariva     |
| 22 | raika      | 74  | maso           | 126 | mihodigna        | 178 | andro      |
| 23 | roa        | 75  | orogna         | 127 | lavo             | 179 | taona      |
| 24 | telo       | 76  | vava           | 128 | magnome          | 180 | mafana     |
| 25 | efatra     | 77  | nify           | 129 | mitana           | 181 | mangatsika |
| 26 | dimy       | 78  | lela           | 130 | mamoritra        | 182 | feno       |
| 27 | agnana be  | 79  | vanjakoho      | 131 | mampikasika      | 183 | vao        |
| 28 | lava       | 80  | tongotra       | 132 | manasa           | 184 | antitra    |
| 29 | malalaky   | 81  | randro         | 133 | mamafa           | 185 | tsara      |
| 30 | matevina   | 82  | lohalitra      | 134 | mitifitra        | 186 | ratsy      |
| 31 | mavesatra  | 83  | tagnana        | 135 | manosika         | 187 | bobongolo  |
| 32 | bitika     | 84  | elatra         | 136 | mamalavala       | 188 | maloto     |
| 33 | fohika     | 85  | kibo           | 137 | mamatotra        | 189 | mahitsy    |
| 34 | tery       | 86  | tsikolika      | 138 | manjaitra        | 190 | boribory   |
| 35 | manify     | 87  | vozogna        | 139 | magnisa          | 191 | maranitra  |
| 36 | viavy      | 88  | lamosina       | 140 | mizaka           | 192 | dombo      |
| 37 | lilahy     | 89  | tratra         | 141 | mihira           | 193 | malama     |
| 38 | olona      | 90  | fo             | 142 | milalao          | 194 | mando      |
| 39 | zaza       | 91  | aty            | 143 | mitsingevaheva   | 195 | maigna     |
| 40 | vady       | 92  | misotro        | 144 | mikorisa         | 196 | mety       |
| 41 | vady       | 93  | mihinana       | 145 | mandry           | 197 | marivo     |
| 42 | endry      | 94  | magnekitra     | 146 | mivonto          | 198 | lavitra    |
| 43 | iaba       | 95  | mitsisitra     | 147 | masoandro        | 199 | havanana   |
| 44 | biby       | 96  | mandrehoka     | 148 | vola             | 200 | havia      |
| 45 | laoka      | 97  | mandoa         | 149 | kintana          | 201 | agny       |
| 46 | vorogna    | 98  | mitsotra       | 150 | rano             | 202 | agnaty     |
| 47 | amboa      | 99  | miaigna        | 151 | orana            | 203 | amin ny    |
| 48 | hao        | 100 | mihomehy       | 152 | renirano         | 204 | de         |
| 49 | bibilava   | 101 | mahita         | 153 | kanaly           | 205 | raha       |
| 50 | viky       | 102 | miteno         | 154 | ranomasina       | 206 | satria     |
| 51 | kakazo     | 103 | mahay          | 155 | sira             | 207 | agnarana   |
| 52 | atiala     | 104 | mieritreritra  | 156 | vato             |     |            |

**18 - Tsimihety (Mandritsara)**

|    |            |     |               |     |             |     |             |
|----|------------|-----|---------------|-----|-------------|-----|-------------|
| 1  | zaho       | 53  | koboay        | 105 | maharegny   | 157 | alagnagna   |
| 2  | anao       | 54  | voankazo      | 106 | matahotro   | 158 | jofompotaka |
| 3  | izy        | 55  | ambe          | 107 | mandry      | 159 | tany        |
| 4  | atsika     | 56  | raviny        | 108 | velogno     | 160 | rondro      |
| 5  | areo       | 57  | vahany        | 109 | maty        | 161 | zavogno     |
| 6  | zareo      | 58  | hodikakazo    | 110 | mamono      | 162 | lagnitry    |
| 7  | toy        | 59  | felagna       | 111 | miady       | 163 | rivotro     |
| 8  | zany       | 60  | ahitry        | 112 | mangorogno  | 164 | fanala      |
| 9  | aketo      | 61  | tady          | 113 | mamboko     | 165 | lagilasy    |
| 10 | aroy       | 62  | hoditry       | 114 | mandidy     | 166 | tsemboko    |
| 11 | azovy      | 63  | hena          | 115 | mamaky      | 167 | motro       |
| 12 | ino        | 64  | lio           | 116 | mitomboko   | 168 | jofo        |
| 13 | aiza       | 65  | taholagna     | 117 | magniky     | 169 | magnoro     |
| 14 | afiriagna  | 66  | vondraka      | 118 | mangady     | 170 | lalagna     |
| 15 | manankory  | 67  | atody         | 119 | milomagno   | 171 | tanety      |
| 16 | aza        | 68  | ampondo       | 120 | magnembagna | 172 | mena        |
| 17 | jiaby      | 69  | ohy           | 121 | mandeha     | 173 | mahitso     |
| 18 | maro       | 70  | volomborogno  | 122 | havy        | 174 | fondragna   |
| 19 | tsy fontry | 71  | maramaragna   | 123 | mandry      | 175 | fotsy       |
| 20 | hely       | 72  | loha          | 124 | mantotry    | 176 | mahintigny  |
| 21 | hafa       | 73  | sofigny       | 125 | mitsangagna | 177 | haligny     |
| 22 | araiky     | 74  | maso          | 126 | mihodigny   | 178 | andro       |
| 23 | aroa       | 75  | horogno       | 127 | lavo        | 179 | tagno       |
| 24 | telo       | 76  | vava          | 128 | magname     | 180 | mafana      |
| 25 | aifatra    | 77  | nify          | 129 | mitagna     | 181 | manintsy    |
| 26 | dimy       | 78  | lela          | 130 | mangoeky    | 182 | feny        |
| 27 | geda       | 79  | angofo        | 131 | mandrokotro | 183 | vaovao      |
| 28 | lava       | 80  | hongotro      | 132 | manasa      | 184 | antitry     |
| 29 | malalaka   | 81  | vavitsy       | 133 | mamafa      | 185 | tsara       |
| 30 | matevigny  | 82  | lohalina      | 134 | mitifitry   | 186 | ratsy       |
| 31 | mavesatra  | 83  | tagnagna      | 135 | manidigny   | 187 | lo          |
| 32 | hely       | 84  | embagna       | 136 | manopy      | 188 | maloto      |
| 33 | fohy       | 85  | boko          | 137 | mamehy      | 189 | mahitsy     |
| 34 | mahety     | 86  | tsinay        | 138 | manjaitry   | 190 | boribory    |
| 35 | matify     | 87  | ambozogno     | 139 | magnisa     | 191 | maragnitry  |
| 36 | vaiavy     | 88  | tahezagna     | 140 | mivolagna   | 192 | malomogno   |
| 37 | lalahy     | 89  | tratra        | 141 | mihira      | 193 | malamatra   |
| 38 | ologno     | 90  | fo            | 142 | misoma      | 194 | lendegny    |
| 39 | zaza       | 91  | aty           | 143 | mitsilay    | 195 | maigny      |
| 40 | vady       | 92  | migiaka       | 144 | mivalagna   | 196 | manjary     |
| 41 | vady       | 93  | homagna       | 145 | mivongagna  | 197 | mariny      |
| 42 | niny       | 94  | magnekitry    | 146 | mivonto     | 198 | lavitry     |
| 43 | baba       | 95  | minono        | 147 | masova      | 199 | ankahery    |
| 44 | biby       | 96  | mihaka        | 148 | davolagna   | 200 | ankavia     |
| 45 | laoko      | 97  | mandoa        | 149 | lakintagna  | 201 | akagny      |
| 46 | vorogno    | 98  | mitsotro      | 150 | rano        | 202 | agnatiny    |
| 47 | amboa      | 99  | miaigny       | 151 | mahalegny   | 203 | amin ny     |
| 48 | hao        | 100 | mimoehy       | 152 | tegnarano   | 204 | sindraiky   |
| 49 | bibilava   | 101 | mahita        | 153 | matsabory   | 205 | raohatra    |
| 50 | hankagna   | 102 | mitandregny   | 154 | ranomasigny | 206 | satria      |
| 51 | kakazo     | 103 | mahay         | 155 | sira        | 207 | agnaragna   |
| 52 | atiala     | 104 | mieritreritry | 156 | vato        |     |             |

**19 - Masikoro (Miary)**

|    |              |     |              |     |                |     |              |
|----|--------------|-----|--------------|-----|----------------|-----|--------------|
| 1  | zaho         | 53  | kobay        | 105 | magnibo        | 157 | fasy         |
| 2  | iha          | 54  | voankazo     | 106 | matahotsy      | 158 | lemboky      |
| 3  | ie           | 55  | vihy         | 107 | miroro         | 159 | tany         |
| 4  | tsika        | 56  | ravi         | 108 | velo           | 160 | hiboky       |
| 5  | nareo        | 57  | fototsy      | 109 | maty           | 161 | zavo         |
| 6  | rozy         | 58  | holinkazo    | 110 | mamono         | 162 | lagnitsy     |
| 7  | toy          | 59  | folera       | 111 | mialy          | 163 | tsioky       |
| 8  | eroy         | 60  | akata        | 112 | maminta        | 164 | ranomihandro |
| 9  | etoa         | 61  | taly         | 113 | mamango        | 165 | vongandrano  |
| 10 | ao           | 62  | holitsy      | 114 | manapaky       | 166 | setroky      |
| 11 | ia           | 63  | hena         | 115 | mamaky         | 167 | bolo         |
| 12 | ino          | 64  | lio          | 116 | mitomboky meso | 168 | lavenoky     |
| 13 | aia          | 65  | taola        | 117 | magnihy        | 169 | magnoro      |
| 14 | mbia         | 66  | vondraky     | 118 | mihaly         | 170 | lala         |
| 15 | manao ahoa   | 67  | atoly        | 119 | milagno        | 171 | vohitsy      |
| 16 | tsy          | 68  | tsifa        | 120 | mitily         | 172 | mena         |
| 17 | iaby         | 69  | ohy          | 121 | mandeha        | 173 | maintso      |
| 18 | maro         | 70  | volomboro    | 122 | avy            | 174 | vogny        |
| 19 | tsy ampiampy | 71  | vololo       | 123 | miroro         | 175 | foty         |
| 20 | kelikely     | 72  | kabeso       | 124 | mipetraky      | 176 | mainty       |
| 21 | hafa         | 73  | sofy         | 125 | mitsanga       | 177 | haliky       |
| 22 | raiky        | 74  | maso         | 126 | miodiky        | 178 | anjo         |
| 23 | roe          | 75  | oro          | 127 | lavo           | 179 | tao          |
| 24 | telo         | 76  | vava         | 128 | magnome        | 180 | mafana       |
| 25 | efatse       | 77  | hy           | 129 | manday         | 181 | manintsy     |
| 26 | limy         | 78  | lela         | 130 | mandrambe      | 182 | atsiky       |
| 27 | bevata       | 79  | hoho         | 131 | mikosoke       | 183 | vao          |
| 28 | lava         | 80  | tomboky      | 132 | manasa         | 184 | antitsy      |
| 29 | malalaky     | 81  | ranjo        | 133 | mamafa         | 185 | soa          |
| 30 | matevy       | 82  | ongotsy      | 134 | mitifitsy      | 186 | raty         |
| 31 | mavesatsy    | 83  | tagna        | 135 | mandrosy       | 187 | mantsy       |
| 32 | maliniky     | 84  | helatsy      | 136 | mitoraky       | 188 | maloto       |
| 33 | boribory     | 85  | troky        | 137 | mamehy         | 189 | mahity       |
| 34 | maifitsy     | 86  | tinay        | 138 | mitsebiky      | 190 | boribory     |
| 35 | matify       | 87  | vozo         | 139 | magnisaky      | 191 | maragnitsy   |
| 36 | ampela       | 88  | lambosy      | 140 | mivola         | 192 | madomoky     |
| 37 | johary       | 89  | tratra       | 141 | miantsa        | 193 | madoso       |
| 38 | olo          | 90  | fo           | 142 | misa           | 194 | lende        |
| 39 | aja          | 91  | aty          | 143 | mitsangevaheva | 195 | maiky        |
| 40 | valy         | 92  | mino         | 144 | mitsororoky    | 196 | mety         |
| 41 | valy         | 93  | mihina       | 145 | mandriky       | 197 | mariniky     |
| 42 | reny         | 94  | magnehitsy   | 146 | mibongo        | 198 | lavitsy      |
| 43 | baba         | 95  | mintsintsiky | 147 | masoandro      | 199 | ankavana     |
| 44 | biby         | 96  | mandrehoky   | 148 | vola           | 200 | ankavia      |
| 45 | fia          | 97  | mandoa       | 149 | basia          | 201 | agny         |
| 46 | voron        | 98  | mitsioky     | 150 | rano           | 202 | agnaty       |
| 47 | alika        | 99  | miay         | 151 | ora            | 203 | amin ny      |
| 48 | hao          | 100 | mihehy       | 152 | vavarano       | 204 | sy           |
| 49 | bibilava     | 101 | mahita       | 153 | kitoboke       | 205 | laha         |
| 50 | soko         | 102 | mijanjanjy   | 154 | riake          | 206 | satria       |
| 51 | hazo         | 103 | mahay        | 155 | sira           | 207 | agnara       |
| 52 | ala          | 104 | mandiniky    | 156 | vato           |     |              |

**20 - Sakalava (Morondava)**

|    |             |     |              |     |                |     |            |
|----|-------------|-----|--------------|-----|----------------|-----|------------|
| 1  | zaho        | 53  | kobay        | 105 | magnimbo       | 157 | fasiky     |
| 2  | iha         | 54  | vihinkazo    | 106 | mavozo         | 158 | vovoky     |
| 3  | ie          | 55  | vihiny       | 107 | miroro         | 159 | tany       |
| 4  | tsika       | 56  | raviny       | 108 | velo           | 160 | hiboky     |
| 5  | reo         | 57  | vahany       | 109 | maty           | 161 | zavo       |
| 6  | rozy        | 58  | holinkazo    | 110 | mamono         | 162 | lagnitsy   |
| 7  | toy         | 59  | folera       | 111 | mialy          | 163 | tsioky     |
| 8  | zay         | 60  | akata        | 112 | mihaza         | 164 | havandra   |
| 9  | eto         | 61  | hosy         | 113 | mamango        | 165 | havandra   |
| 10 | ao          | 62  | holitsy      | 114 | manapaky       | 166 | setroky    |
| 11 | ia          | 63  | hena         | 115 | mizara         | 167 | motro      |
| 12 | ino         | 64  | lio          | 116 | mitomboky meso | 168 | lavenoky   |
| 13 | aia         | 65  | taola        | 117 | magnihy        | 169 | magnoro    |
| 14 | ombia       | 66  | vondraky     | 118 | mihaly         | 170 | lala       |
| 15 | akory       | 67  | atoly        | 119 | milagno        | 171 | vohitsy    |
| 16 | tsy         | 68  | tandroky     | 120 | mitily         | 172 | mena       |
| 17 | iaby        | 69  | hohy         | 121 | mandeha        | 173 | maitso     |
| 18 | maro        | 70  | volomboro    | 122 | avy            | 174 | vogny      |
| 19 | tsiampiampy | 71  | vololo       | 123 | miroro         | 175 | foty       |
| 20 | tsiampy     | 72  | loha         | 124 | mitoboky       | 176 | mainty     |
| 21 | hafa        | 73  | sofy         | 125 | mitsanga       | 177 | matognaly  |
| 22 | raiky       | 74  | maso         | 126 | mihodiky       | 178 | andro      |
| 23 | roe         | 75  | oro          | 127 | miantonta      | 179 | tao        |
| 24 | telo        | 76  | vava         | 128 | magnome        | 180 | may        |
| 25 | efatsy      | 77  | hy           | 129 | mitazo         | 181 | manintsy   |
| 26 | dimy        | 78  | lela         | 130 | mipiritsy      | 182 | atsiky     |
| 27 | bevata      | 79  | hoho         | 131 | mikosiky       | 183 | vao        |
| 28 | lava        | 80  | tomboky      | 132 | manasa         | 184 | antitsy    |
| 29 | malalaky    | 81  | ranjo        | 133 | mamotsy        | 185 | soa        |
| 30 | matevy      | 82  | lohaliky     | 134 | mitifitsy      | 186 | raty       |
| 31 | mavesatsy   | 83  | tagna        | 135 | manosiky       | 187 | mantsy     |
| 32 | kelikely    | 84  | elatsy       | 136 | mitoraky       | 188 | maloto     |
| 33 | boribory    | 85  | sarotro      | 137 | mamehy         | 189 | mahity     |
| 34 | maifitsy    | 86  | tinay        | 138 | mitrebiky      | 190 | boriboriky |
| 35 | matify      | 87  | vozo         | 139 | magnisaky      | 191 | maragnitsy |
| 36 | ampela      | 88  | lambosy      | 140 | magnambara     | 192 | dombo      |
| 37 | johary      | 89  | tratra       | 141 | miantsa        | 193 | madoso     |
| 38 | olo         | 90  | fo           | 142 | misa           | 194 | le         |
| 39 | aja         | 91  | aty          | 143 | mihafo         | 195 | maiky      |
| 40 | valy        | 92  | mino         | 144 | mivavatsy      | 196 | mahity     |
| 41 | valy        | 93  | homa         | 145 | mandrike       | 197 | mariniky   |
| 42 | neny        | 94  | magnehitse   | 146 | mivonto        | 198 | lavitsy    |
| 43 | baba        | 95  | minono       | 147 | masoandro      | 199 | havana     |
| 44 | biby        | 96  | mandrehoky   | 148 | vola           | 200 | havia      |
| 45 | fia         | 97  | mandoa       | 149 | basia          | 201 | agny       |
| 46 | voron       | 98  | mifioky      | 150 | rano           | 202 | agnaty     |
| 47 | amboa       | 99  | miay         | 151 | ora            | 203 | amin ny    |
| 48 | hao         | 100 | mihehy       | 152 | vavarano       | 204 | noho       |
| 49 | bibilava    | 101 | manenty      | 153 | dobo           | 205 | laha       |
| 50 | hanka       | 102 | mijanjanjy   | 154 | ranomasy       | 206 | satria     |
| 51 | hazo        | 103 | mahay        | 155 | sira           | 207 | agnara     |
| 52 | ala         | 104 | mametsivetsy | 156 | vato           |     |            |

**21 - Antanosy (Tolagnaro)**

|    |              |     |             |     |                |     |             |
|----|--------------|-----|-------------|-----|----------------|-----|-------------|
| 1  | izaho        | 53  | angira      | 105 | magnatsona     | 157 | fasy        |
| 2  | hanao        | 54  | voankazo    | 106 | matahosal      | 158 | lemboky     |
| 3  | izy          | 55  | vihy        | 107 | matory         | 159 | tany        |
| 4  | sika         | 56  | raviny      | 108 | velo           | 160 | raho        |
| 5  | handreo      | 57  | vahatsy     | 109 | maty           | 161 | zavo        |
| 6  | lahireo      | 58  | holikazo    | 110 | mamono         | 162 | lagnisy     |
| 7  | ty           | 59  | voninkazo   | 111 | miady          | 163 | rivosy      |
| 8  | iriho        | 60  | ahitsy      | 112 | mamita         | 164 | fanala      |
| 9  | etaho        | 61  | tady        | 113 | manjera        | 165 | ranomivonga |
| 10 | ao           | 62  | hoditry     | 114 | manapaky       | 166 | setroky     |
| 11 | ia           | 63  | hena        | 115 | mizara         | 167 | afo         |
| 12 | ino          | 64  | lio         | 116 | mitomboky mesa | 168 | lavenoky    |
| 13 | aia          | 65  | taola       | 117 | mikihy         | 169 | magnoro     |
| 14 | ombia        | 66  | vondraky    | 118 | mihaly         | 170 | lala        |
| 15 | miahy akory  | 67  | atody       | 119 | milomagno      | 171 | vohisy      |
| 16 | tsy          | 68  | tsifa       | 120 | mitily         | 172 | mena        |
| 17 | iereo aby    | 69  | ohiny       | 121 | mandeha        | 173 | menso       |
| 18 | maro         | 70  | volomboro   | 122 | avy            | 174 | vogny       |
| 19 | kidikidy     | 71  | volo        | 123 | mandry         | 175 | fosy        |
| 20 | kidy         | 72  | loha        | 124 | mitoboky       | 176 | menty       |
| 21 | hafa         | 73  | sofy        | 125 | misanga        | 177 | hariva      |
| 22 | raiky        | 74  | maso        | 126 | mihodiky       | 178 | andro       |
| 23 | ro           | 75  | oro         | 127 | lavo           | 179 | tao         |
| 24 | telo         | 76  | vava        | 128 | magnome        | 180 | mafana      |
| 25 | efatry       | 77  | nify        | 129 | mita           | 181 | manara      |
| 26 | dimy         | 78  | lela        | 130 | mandramby      | 182 | feny        |
| 27 | foloay       | 79  | hoho        | 131 | migosa         | 183 | vaovao      |
| 28 | lava         | 80  | tomboky     | 132 | manasa         | 184 | antisy      |
| 29 | malaladalaky | 81  | ranjo       | 133 | mamafa         | 185 | soa         |
| 30 | matevy       | 82  | pokopoko    | 134 | mitifisy       | 186 | rasy        |
| 31 | mavesatry    | 83  | tagna       | 135 | manosiky       | 187 | mavay       |
| 32 | kidy         | 84  | elatsy      | 136 | manoraky       | 188 | maloto      |
| 33 | fohy         | 85  | troky       | 137 | mamatosy       | 189 | mahisy      |
| 34 | tery         | 86  | sinay       | 138 | manzaisy       | 190 | boribory    |
| 35 | mahia        | 87  | vozo        | 139 | magnisaky      | 191 | maragnisy   |
| 36 | ampela       | 88  | lambosy     | 140 | magnambara     | 192 | domoky      |
| 37 | lelahy       | 89  | tratra      | 141 | miantsa        | 193 | malama      |
| 38 | olo          | 90  | fo          | 142 | mihira         | 194 | mando       |
| 39 | zaza         | 91  | aty         | 143 | mitsinkafo     | 195 | maiky       |
| 40 | vady         | 92  | mino        | 144 | mikororoky     | 196 | mety        |
| 41 | vady         | 93  | mihina      | 145 | mandry         | 197 | mariny      |
| 42 | endry        | 94  | manifasy    | 146 | mibonsy        | 198 | lavisy      |
| 43 | ra           | 95  | mitsintsiky | 147 | masoandro      | 199 | havana      |
| 44 | biby         | 96  | mandrehoky  | 148 | vola           | 200 | havia       |
| 45 | fia          | 97  | mandoa      | 149 | kinta          | 201 | agny        |
| 46 | voroy        | 98  | mifioky     | 150 | rano           | 202 | agnatiny    |
| 47 | amboay       | 99  | miay        | 151 | ora            | 203 | amin gny    |
| 48 | hao          | 100 | mihehy      | 152 | renirano       | 204 | da          |
| 49 | bibilava     | 101 | mahita      | 153 | farihy         | 205 | no          |
| 50 | soko         | 102 | miheno      | 154 | riaky          | 206 | satria      |
| 51 | hazo         | 103 | mahay       | 155 | sira           | 207 | agnara      |
| 52 | ala          | 104 | mieriserisy | 156 | vato           |     |             |

**22 - Vezo (Toliara)**

|    |             |     |            |     |                |     |             |
|----|-------------|-----|------------|-----|----------------|-----|-------------|
| 1  | zaho        | 53  | kobay      | 105 | manimbo        | 157 | fasy        |
| 2  | iha         | 54  | voankazo   | 106 | matahotse      | 158 | lemboke     |
| 3  | ie          | 55  | voa        | 107 | miroro         | 159 | tany        |
| 4  | tsika       | 56  | ravy       | 108 | velo           | 160 | hiboke      |
| 5  | nareo       | 57  | fototse    | 109 | mate           | 161 | zavo        |
| 6  | rozy        | 58  | holinkazo  | 110 | mamono         | 162 | lanitse     |
| 7  | toy         | 59  | folera     | 111 | mialy          | 163 | tsioke      |
| 8  | zay         | 60  | akata      | 112 | mihaza         | 164 | ranomivonga |
| 9  | etoa        | 61  | taly       | 113 | mamango        | 165 | vongandrano |
| 10 | ao          | 62  | holitse    | 114 | manapake       | 166 | setroke     |
| 11 | ia          | 63  | hena       | 115 | mamake         | 167 | afo         |
| 12 | ino         | 64  | lio        | 116 | mitomboke meso | 168 | lavenoke    |
| 13 | aia         | 65  | taola      | 117 | mikihy         | 169 | tsofora     |
| 14 | ombia       | 66  | vonjake    | 118 | mihaly         | 170 | lala        |
| 15 | akory       | 67  | atoly      | 119 | milano         | 171 | vohitse     |
| 16 | tsy         | 68  | tsifa      | 120 | mitily         | 172 | mena        |
| 17 | iaby        | 69  | hohy       | 121 | mandeha        | 173 | maintso     |
| 18 | maro        | 70  | volomboro  | 122 | avy            | 174 | mavo        |
| 19 | tsiampeampe | 71  | volo       | 123 | miroro         | 175 | foty        |
| 20 | tsiampe     | 72  | loha       | 124 | mitoboke       | 176 | mainte      |
| 21 | hafa        | 73  | sofy       | 125 | mitsanga       | 177 | haly        |
| 22 | raike       | 74  | maso       | 126 | mihodike       | 178 | andro       |
| 23 | roe         | 75  | oro        | 127 | tonta          | 179 | tao         |
| 24 | telo        | 76  | vava       | 128 | manome         | 180 | mafana      |
| 25 | efatse      | 77  | hy         | 129 | mifampitanjake | 181 | manintsy    |
| 26 | lime        | 78  | lela       | 130 | mipiritsy      | 182 | feny        |
| 27 | bevata      | 79  | hoho       | 131 | mampikasoke    | 183 | vaovao      |
| 28 | lava        | 80  | tomboke    | 132 | manasa         | 184 | antitse     |
| 29 | malalake    | 81  | ranjo      | 133 | mamafa         | 185 | soa         |
| 30 | mateve      | 82  | ongotse    | 134 | mitifitse      | 186 | raty        |
| 31 | mavesatse   | 83  | tana       | 135 | manosike       | 187 | mavay       |
| 32 | malinike    | 84  | elatse     | 136 | manary         | 188 | maloto      |
| 33 | boribory    | 85  | sarotso    | 137 | mamehe         | 189 | mahity      |
| 34 | maifitse    | 86  | tinay      | 138 | mitsebike      | 190 | boribory    |
| 35 | matify      | 87  | vozo       | 139 | manisake       | 191 | maranitse   |
| 36 | ampela      | 88  | lambosy    | 140 | mivola         | 192 | madomoke    |
| 37 | lelahy      | 89  | tsatsa     | 141 | mihira         | 193 | madoso      |
| 38 | olo         | 90  | fo         | 142 | mihisa         | 194 | le          |
| 39 | anakaja     | 91  | aty        | 143 | mihafy         | 195 | maike       |
| 40 | valy        | 92  | mino       | 144 | mitsororoke    | 196 | mete        |
| 41 | valy        | 93  | mihina     | 145 | mandrike       | 197 | marine      |
| 42 | nene        | 94  | manehitse  | 146 | mivonto        | 198 | lavitse     |
| 43 | baba        | 95  | mitsitsike | 147 | masoandro      | 199 | ankavana    |
| 44 | biby        | 96  | mandrehoke | 148 | vola           | 200 | ankavia     |
| 45 | fia         | 97  | mandoa     | 149 | basia          | 201 | ane         |
| 46 | voron       | 98  | mitsoke    | 150 | rano           | 202 | anaty       |
| 47 | alika       | 99  | miay       | 151 | ora            | 203 | amin ny     |
| 48 | hao         | 100 | mihehy     | 152 | vavarano       | 204 | sy          |
| 49 | bibilava    | 101 | mahita     | 153 | kitoboke       | 205 | laha        |
| 50 | soko        | 102 | mijanjy    | 154 | riake          | 206 | satsia      |
| 51 | hazo        | 103 | mahay      | 155 | sira           | 207 | anara       |
| 52 | ala         | 104 | mandinike  | 156 | vato           |     |             |



### 23 - Antaisaka (Vangaindrano)

|    |           |     |             |     |                 |     |            |
|----|-----------|-----|-------------|-----|-----------------|-----|------------|
| 1  | iaho      | 53  | angira      | 105 | magnorogny      | 157 | fasiky     |
| 2  | anao      | 54  | vokazo      | 106 | matatry         | 158 | bo         |
| 3  | izy       | 55  | isikiky     | 107 | mandry          | 159 | tany       |
| 4  | isika     | 56  | raviny      | 108 | velo            | 160 | mika       |
| 5  | indreo    | 57  | vahitry     | 109 | maty            | 161 | zavo       |
| 6  | anareo    | 58  | oditrazo    | 110 | mamono          | 162 | lagnitry   |
| 7  | itiky     | 59  | vonikazo    | 111 | miady           | 163 | rivotry    |
| 8  | zany      | 60  | atry        | 112 | mihaza          | 164 | ranomandry |
| 9  | etoa      | 61  | tady        | 113 | mifiky          | 165 | glatsy     |
| 10 | ao        | 62  | daro        | 114 | manapaky        | 166 | setroky    |
| 11 | ia        | 63  | hena        | 115 | mamaky          | 167 | afo        |
| 12 | ino       | 64  | ra          | 116 | mitomboky antsy | 168 | lakevo     |
| 13 | aia       | 65  | tola        | 117 | mifiky          | 169 | magnoro    |
| 14 | ovia      | 66  | sabora      | 118 | mihady          | 170 | lala       |
| 15 | akory     | 67  | atody       | 119 | milagno         | 171 | vohitry    |
| 16 | tsy       | 68  | tandroky    | 120 | mandrembo       | 172 | mena       |
| 17 | iaby      | 69  | hoiny       | 121 | mandeha         | 173 | metso      |
| 18 | maro      | 70  | volomboro   | 122 | avy             | 174 | manamotamo |
| 19 | kidikidy  | 71  | vololo      | 123 | mandry          | 175 | fotsy      |
| 20 | kidy      | 72  | loha        | 124 | mitoboky        | 176 | mity       |
| 21 | hafa      | 73  | sofy        | 125 | mitsanga        | 177 | hariva     |
| 22 | raiky     | 74  | maso        | 126 | mihody          | 178 | andro      |
| 23 | roy       | 75  | oro         | 127 | lavo            | 179 | tao        |
| 24 | telo      | 76  | vava        | 128 | magnome         | 180 | mafana     |
| 25 | efatry    | 77  | nify        | 129 | mitagna         | 181 | manara     |
| 26 | dimy      | 78  | lela        | 130 | mitery          | 182 | feny       |
| 27 | zakabe    | 79  | vazakoho    | 131 | magnakasoky     | 183 | vao        |
| 28 | abo       | 80  | tomboky     | 132 | manasa          | 184 | atitry     |
| 29 | malalaky  | 81  | randro      | 133 | mamafa          | 185 | tsara      |
| 30 | matevy    | 82  | pokopoko    | 134 | mitifitry       | 186 | ratsy      |
| 31 | mavesatry | 83  | tagna       | 135 | manosiky        | 187 | lo         |
| 32 | kidy      | 84  | elatry      | 136 | mitoraky        | 188 | maloto     |
| 33 | fohy      | 85  | troky       | 137 | mamehy          | 189 | mahitsy    |
| 34 | pitsa     | 86  | oliky       | 138 | manjaitry       | 190 | boribory   |
| 35 | manify    | 87  | vozo        | 139 | magnisa         | 191 | maragnitry |
| 36 | viavy     | 88  | lamosy      | 140 | mizaka          | 192 | bofogna    |
| 37 | lehilay   | 89  | tratra      | 141 | mihira          | 193 | malama     |
| 38 | olo       | 90  | fo          | 142 | mihira          | 194 | le         |
| 39 | zaza      | 91  | aty         | 143 | miepo           | 195 | mainy      |
| 40 | vady      | 92  | mindrano    | 144 | magnidina       | 196 | marigny    |
| 41 | vady      | 93  | mihina      | 145 | mandry          | 197 | akeky      |
| 42 | endry     | 94  | magnifatry  | 146 | mivonto         | 198 | lavitry    |
| 43 | aba       | 95  | mitsetsitry | 147 | masoandro       | 199 | akavana    |
| 44 | biby      | 96  | mandreoky   | 148 | vola            | 200 | akavia     |
| 45 | vily      | 97  | mandoa      | 149 | vasia           | 201 | agny       |
| 46 | voron     | 98  | misioky     | 150 | rano            | 202 | agnaty     |
| 47 | amboa     | 99  | miaigny     | 151 | rikandro        | 203 | ame        |
| 48 | hao       | 100 | mihehy      | 152 | tegnarano       | 204 | sy         |
| 49 | bibilava  | 101 | maita       | 153 | dobondrano      | 205 | ra         |
| 50 | haka      | 102 | miteno      | 154 | ranomasy        | 206 | satria     |
| 51 | hazo      | 103 | mahay       | 155 | sira            | 207 | agnara     |
| 52 | ala       | 104 | mandiniky   | 156 | vato            |     |            |

**24 - Antankarana (Voohemar)**

|    |           |     |                |     |             |     |            |
|----|-----------|-----|----------------|-----|-------------|-----|------------|
| 1  | zaho      | 53  | kibay          | 105 | maharegny   | 157 | jia        |
| 2  | anao      | 54  | voankazo       | 106 | mavozo      | 158 | laposiera  |
| 3  | izy       | 55  | ambeo          | 107 | mandry      | 159 | tany       |
| 4  | atsika    | 56  | raviny         | 108 | velogno     | 160 | zavogno    |
| 5  | anaro     | 57  | vahatra        | 109 | maty        | 161 | rondro     |
| 6  | iro       | 58  | hoditry kakazo | 110 | mamono      | 162 | lagnitry   |
| 7  | ty        | 59  | folera         | 111 | miady       | 163 | tsiko      |
| 8  | zegny     | 60  | ahitry         | 112 | mihaza      | 164 | lanezy     |
| 9  | eto       | 61  | tady           | 113 | mamopoko    | 165 | gilasy     |
| 10 | ary       | 62  | hoditry        | 114 | manapaka    | 166 | setroko    |
| 11 | azovy     | 63  | hena           | 115 | mamaky      | 167 | motro      |
| 12 | ino       | 64  | lio            | 116 | manomboko   | 168 | jofo       |
| 13 | aia       | 65  | taholagna      | 117 | mikiky      | 169 | magnoro    |
| 14 | mbiagna   | 66  | vondraka       | 118 | mangady     | 170 | lalagna    |
| 15 | karakory  | 67  | atody          | 119 | milomagno   | 171 | bongo      |
| 16 | tsy       | 68  | ampondo        | 120 | mitiligny   | 172 | mena       |
| 17 | jiaby     | 69  | ohiny          | 121 | mandeha     | 173 | maitso     |
| 18 | maro      | 70  | volomborona    | 122 | tonga       | 174 | manamotamo |
| 19 | tsy maro  | 71  | fagneva        | 123 | mandry      | 175 | malandy    |
| 20 | hely      | 72  | loha           | 124 | mipetraka   | 176 | joby       |
| 21 | hafa      | 73  | sofigny        | 125 | mitsangana  | 177 | aligny     |
| 22 | araiky    | 74  | maso           | 126 | magnodigny  | 178 | andra      |
| 23 | aroe      | 75  | orogno         | 127 | lavo        | 179 | taogno     |
| 24 | telo      | 76  | vava           | 128 | magnamia    | 180 | mafana     |
| 25 | efatra    | 77  | nify           | 129 | mitintigny  | 181 | manintsy   |
| 26 | dimy      | 78  | lela           | 130 | manery      | 182 | feny       |
| 27 | maventy   | 79  | angofy         | 131 | magnakasiky | 183 | vaovao     |
| 28 | lava      | 80  | vity           | 132 | manasa      | 184 | matoy      |
| 29 | malalaka  | 81  | kirandra       | 133 | mamitry     | 185 | tsara      |
| 30 | matevigny | 82  | lohalitry      | 134 | mitifitry   | 186 | ratsy      |
| 31 | mavesatra | 83  | tagnana        | 135 | mandronjy   | 187 | motraka    |
| 32 | hely      | 84  | elatra         | 136 | manoraka    | 188 | maloto     |
| 33 | fohiky    | 85  | kibo           | 137 | mamehy      | 189 | mahitsy    |
| 34 | malety    | 86  | tsontsory      | 138 | manjaitry   | 190 | boribory   |
| 35 | matify    | 87  | vozogno        | 139 | mikonty     | 191 | maragnitry |
| 36 | magnangy  | 88  | tahezagna      | 140 | mivolagna   | 192 | magofogno  |
| 37 | lelahy    | 89  | tratra         | 141 | miantsa     | 193 | malamatra  |
| 38 | olo       | 90  | fo             | 142 | misoma      | 194 | legny      |
| 39 | tsaiky    | 91  | haty           | 143 | miefogno    | 195 | maiky      |
| 40 | vady      | 92  | migiaka        | 144 | mivalagna   | 196 | marigny    |
| 41 | vady      | 93  | mihinagna      | 145 | mandry      | 197 | marikitry  |
| 42 | nindry    | 94  | magnekitry     | 146 | mivona      | 198 | lavitry    |
| 43 | baba      | 95  | minono         | 147 | masoandro   | 199 | ankavanana |
| 44 | biby      | 96  | mihaka         | 148 | fanjava     | 200 | ankavia    |
| 45 | laoko     | 97  | mandoa         | 149 | lakintagna  | 201 | agny       |
| 46 | vorogno   | 98  | mitsoko        | 150 | rano        | 202 | agnatiny   |
| 47 | amboa     | 99  | miaigny        | 151 | mahalegny   | 203 | miaraka    |
| 48 | hao       | 100 | mitokiky       | 152 | tegnandrano | 204 | ndraiky    |
| 49 | bibilava  | 101 | mizaha         | 153 | farihy      | 205 | raha       |
| 50 | hankagna  | 102 | mitandregny    | 154 | ranomasigny | 206 | fony       |
| 51 | kakazo    | 103 | mahay          | 155 | sira        | 207 | agnarana   |
| 52 | atiala    | 104 | mandiniky      | 156 | vato        |     |            |

**25 - Betsileo (Ambositra)**

|    |           |     |               |     |                |     |               |
|----|-----------|-----|---------------|-----|----------------|-----|---------------|
| 1  | aho       | 53  | tehina        | 105 | mifofona       | 157 | fasika        |
| 2  | agnao     | 54  | vokazo        | 106 | matahotra      | 158 | vovoka        |
| 3  | ii        | 55  | voa           | 107 | matory         | 159 | tany          |
| 4  | sika      | 56  | ravina        | 108 | velogna        | 160 | rahogna       |
| 5  | agnareo   | 57  | vahatra       | 109 | maty           | 161 | zavona        |
| 6  | reo       | 58  | hodikazo      | 110 | mamono         | 162 | lanitra       |
| 7  | ty        | 59  | voninkazo     | 111 | miady          | 163 | rivotra       |
| 8  | mitroka   | 60  | ahitra        | 112 | mihaza         | 164 | ranomandry    |
| 9  | etohe     | 61  | tady          | 113 | mikapoka       | 165 | ranomandry    |
| 10 | ao        | 62  | hoditra       | 114 | mandidy        | 166 | setroka       |
| 11 | ia        | 63  | hena          | 115 | manilaky       | 167 | afo           |
| 12 | ina       | 64  | ra            | 116 | manatoka antsy | 168 | lavenona      |
| 13 | aia       | 65  | taolagna      | 117 | mikiky         | 169 | magnoro       |
| 14 | viena     | 66  | taviny        | 118 | mangady        | 170 | lalagna       |
| 15 | akory     | 67  | atody         | 119 | mandagno       | 171 | tendrobohitsa |
| 16 | tsa       | 68  | tandroka      | 120 | manidigna      | 172 | mena          |
| 17 | aby       | 69  | rambo         | 121 | mandeha        | 173 | maitso        |
| 18 | be        | 70  | volomborogna  | 122 | avy            | 174 | vogny         |
| 19 | kelikely  | 71  | volo          | 123 | mandrimandry   | 175 | fotsy         |
| 20 | kely      | 72  | loha          | 124 | mitoetra       | 176 | maity         |
| 21 | hafa      | 73  | sofigna       | 125 | mitsangagna    | 177 | aligna        |
| 22 | raika     | 74  | maso          | 126 | mihodigna      | 178 | andro         |
| 23 | roa       | 75  | orogna        | 127 | mienjika       | 179 | taogna        |
| 24 | telo      | 76  | vava          | 128 | manome         | 180 | mafana        |
| 25 | efatra    | 77  | nify          | 129 | mitantagna     | 181 | mangitsy      |
| 26 | dimy      | 78  | lela          | 130 | manery         | 182 | feno          |
| 27 | geda      | 79  | hoho          | 131 | manakasoka     | 183 | vaovao        |
| 28 | lava      | 80  | tongotra      | 132 | manasa         | 184 | atitra        |
| 29 | malalaka  | 81  | ranjo         | 133 | mamafa         | 185 | soa           |
| 30 | matevina  | 82  | lohalika      | 134 | mitifitra      | 186 | ratsy         |
| 31 | mavesatra | 83  | tagnana       | 135 | manosika       | 187 | lo            |
| 32 | kely      | 84  | elatra        | 136 | mitoraka       | 188 | maloto        |
| 33 | fohy      | 85  | kibo          | 137 | manjaitra      | 189 | mahitsy       |
| 34 | tery      | 86  | tsinay        | 138 | manjaitsa      | 190 | boribory      |
| 35 | manify    | 87  | vozogna       | 139 | magnisa        | 191 | maragnitra    |
| 36 | vevavy    | 88  | lamosigna     | 140 | milaza         | 192 | dombo         |
| 37 | lelahy    | 89  | tratra        | 141 | mihira         | 193 | malama        |
| 38 | ona       | 90  | fo            | 142 | milalao        | 194 | laigna        |
| 39 | kilonga   | 91  | aty           | 143 | mitsikafogna   | 195 | maigna        |
| 40 | vady      | 92  | migoka        | 144 | mikoriagna     | 196 | marina        |
| 41 | vady      | 93  | mihinana      | 145 | mandry         | 197 | mariny        |
| 42 | neny      | 94  | magnaikitra   | 146 | mibotsigna     | 198 | lavitra       |
| 43 | baba      | 95  | misika        | 147 | masoandro      | 199 | havanana      |
| 44 | biby      | 96  | mandrehoka    | 148 | volana         | 200 | havia         |
| 45 | trondro   | 97  | mandoa        | 149 | kitana         | 201 | agny          |
| 46 | vorogna   | 98  | mitsioka      | 150 | rano           | 202 | agnaty        |
| 47 | amboa     | 99  | miaigna       | 151 | orana          | 203 | amin ny       |
| 48 | hao       | 100 | mimehy        | 152 | renirano       | 204 | sy            |
| 49 | bibilava  | 101 | mahita        | 153 | atara          | 205 | reha          |
| 50 | kakagna   | 102 | miheno        | 154 | ranomasina     | 206 | satria        |
| 51 | hazo      | 103 | mahay         | 155 | sira           | 207 | agnarana      |
| 52 | ala       | 104 | mieritreritra | 156 | vato           |     |               |

**26 - Betsileo (Ambalavao)**

|    |           |     |               |     |                |     |               |
|----|-----------|-----|---------------|-----|----------------|-----|---------------|
| 1  | iaho      | 53  | tehy          | 105 | mifofona       | 157 | fasika        |
| 2  | agnao     | 54  | voakazo       | 106 | matahotse      | 158 | vovotany      |
| 3  | i         | 55  | voa           | 107 | matory         | 159 | tany          |
| 4  | atsika    | 56  | ravy          | 108 | velo           | 160 | raho          |
| 5  | agnareo   | 57  | faka          | 109 | maty           | 161 | zavo          |
| 6  | reo       | 58  | hodikazo      | 110 | mamono         | 162 | lagnitse      |
| 7  | itito     | 59  | vonikazo      | 111 | miady          | 163 | rivotse       |
| 8  | zao       | 60  | ahitsa        | 112 | mihaza         | 164 | ranomandry    |
| 9  | ateto     | 61  | tady          | 113 | manjera        | 165 | gilasy        |
| 10 | atato     | 62  | hoditse       | 114 | mandidy        | 166 | setroke       |
| 11 | ia        | 63  | hena          | 115 | mamaky         | 167 | afo           |
| 12 | ino       | 64  | ra            | 116 | manomboka mesa | 168 | laveno        |
| 13 | aia       | 65  | taolagna      | 117 | mikiky         | 169 | magnoro       |
| 14 | ovia      | 66  | jabora        | 118 | mihady         | 170 | lala          |
| 15 | nahoa     | 67  | atody         | 119 | milagno        | 171 | tendromboitse |
| 16 | tsa       | 68  | tsifa         | 120 | mitsidy        | 172 | mena          |
| 17 | aby       | 69  | rambo         | 121 | mandeha        | 173 | maitso        |
| 18 | be        | 70  | volomboro     | 122 | avy            | 174 | mavo          |
| 19 | kelikely  | 71  | vololo        | 123 | mandry         | 175 | fotsy         |
| 20 | kele      | 72  | loha          | 124 | mitoatse       | 176 | mainty        |
| 21 | hafa      | 73  | sofy          | 125 | mitsanga       | 177 | aly           |
| 22 | raika     | 74  | maso          | 126 | mihody         | 178 | andro         |
| 23 | roa       | 75  | oro           | 127 | migebo         | 179 | tao           |
| 24 | telo      | 76  | vava          | 128 | magnome        | 180 | mafana        |
| 25 | efatse    | 77  | nify          | 129 | mitagna        | 181 | manara        |
| 26 | dimy      | 78  | lela          | 130 | mamotsika      | 182 | feny          |
| 27 | lihibe    | 79  | hoho          | 131 | magnasoka      | 183 | vaovao        |
| 28 | lava      | 80  | tongotse      | 132 | manasa         | 184 | atitse        |
| 29 | malalake  | 81  | kirango       | 133 | mamafa         | 185 | soa           |
| 30 | matevy    | 82  | lohalika      | 134 | mitifotse      | 186 | ratsy         |
| 31 | mavesatse | 83  | tagna         | 135 | manosike       | 187 | lo            |
| 32 | kele      | 84  | elatsa        | 136 | mitorake       | 188 | maloto        |
| 33 | fohy      | 85  | troky         | 137 | mamehe         | 189 | mahitsy       |
| 34 | tere      | 86  | tsinay        | 138 | manjaitse      | 190 | boribory      |
| 35 | manify    | 87  | vozo          | 139 | magnisa        | 191 | maragnitsa    |
| 36 | apela     | 88  | lamosy        | 140 | mitaro         | 192 | dombo         |
| 37 | lihilahy  | 89  | tratra        | 141 | mihira         | 193 | malama        |
| 38 | olo       | 90  | fo            | 142 | miregny        | 194 | mando         |
| 39 | kilonga   | 91  | aty           | 143 | mitsingafo     | 195 | maigna        |
| 40 | vady      | 92  | misotro       | 144 | mikoria        | 196 | mety          |
| 41 | vady      | 93  | mihina        | 145 | mandry         | 197 | mariny        |
| 42 | nene      | 94  | magnehitsa    | 146 | magnabotsigna  | 198 | lavitse       |
| 43 | baba      | 95  | misike        | 147 | masoandro      | 199 | havana        |
| 44 | biby      | 96  | mandrehoka    | 148 | volagna        | 200 | havia         |
| 45 | talapia   | 97  | mandoa        | 149 | kintana        | 201 | agny          |
| 46 | voron     | 98  | mifioky       | 150 | rano           | 202 | agnaty        |
| 47 | amboa     | 99  | miaigna       | 151 | ora            | 203 | amin ny       |
| 48 | hao       | 100 | mihehy        | 152 | vavarano       | 204 | sy            |
| 49 | bibilava  | 101 | mahita        | 153 | farihy         | 205 | lehe          |
| 50 | haka      | 102 | mitaino       | 154 | ranomasina     | 206 | satria        |
| 51 | hazo      | 103 | mahay         | 155 | sira           | 207 | agnara        |
| 52 | ala       | 104 | mieritseritsa | 156 | vato           |     |               |

**27 - Antanalana (Itampolo)**

|    |           |     |             |     |                |     |              |
|----|-----------|-----|-------------|-----|----------------|-----|--------------|
| 1  | iraho     | 53  | kobay       | 105 | manimboke      | 157 | faseke       |
| 2  | iriha     | 54  | voankazo    | 106 | mavaka         | 158 | lemboke      |
| 3  | ireke     | 55  | tabiry      | 107 | miroro         | 159 | tane         |
| 4  | itika     | 56  | ravene      | 108 | velo           | 160 | raho         |
| 5  | iereo     | 57  | fotone      | 109 | mate           | 161 | mika         |
| 6  | iareo     | 58  | holinketae  | 110 | mamono         | 162 | lanitse      |
| 7  | itike     | 59  | folera      | 111 | mialy          | 163 | tioke        |
| 8  | izay      | 60  | akata       | 112 | mihaza         | 164 | ranomandrike |
| 9  | etoa      | 61  | taly        | 113 | mamango        | 165 | ranomandrike |
| 10 | ao        | 62  | holitse     | 114 | manampake      | 166 | setroke      |
| 11 | ia        | 63  | hena        | 115 | mizara         | 167 | afo          |
| 12 | ino       | 64  | lio         | 116 | mitomboke meso | 168 | lavenoke     |
| 13 | aia       | 65  | taola       | 117 | mandraotse     | 169 | manoro       |
| 14 | ombia     | 66  | saborane    | 118 | mihaly         | 170 | lala         |
| 15 | akore     | 67  | atoly       | 119 | milano         | 171 | vohitse      |
| 16 | tsie      | 68  | tsifa       | 120 | mitily         | 172 | mena         |
| 17 | iaby      | 69  | solone      | 121 | mindeha        | 173 | maitso       |
| 18 | maro      | 70  | volomboro   | 122 | avy            | 174 | vone         |
| 19 | tsy ampe  | 71  | volo        | 123 | miroro         | 175 | foty         |
| 20 | kele      | 72  | loha        | 124 | mitoboke       | 176 | mainty       |
| 21 | hafa      | 73  | sofy        | 125 | mitsanga       | 177 | haleke       |
| 22 | raike     | 74  | maso        | 126 | miodike        | 178 | andro        |
| 23 | roe       | 75  | oro         | 127 | mitonta        | 179 | tao          |
| 24 | telo      | 76  | vava        | 128 | manome         | 180 | mae          |
| 25 | efatre    | 77  | hy          | 129 | mitanjake      | 181 | manintsy     |
| 26 | lime      | 78  | famelake    | 130 | mitere         | 182 | feny         |
| 27 | bey       | 79  | hoho        | 131 | mikasoke       | 183 | vaovao       |
| 28 | lava      | 80  | tomboke     | 132 | manasa         | 184 | antitse      |
| 29 | malalake  | 81  | ranjo       | 133 | mamafa         | 185 | soa          |
| 30 | mateve    | 82  | ongotse     | 134 | mitifitse      | 186 | raty         |
| 31 | tsiongake | 83  | tanake      | 135 | manosike       | 187 | taratavohe   |
| 32 | malinike  | 84  | elatse      | 136 | atorake        | 188 | maloto       |
| 33 | boribory  | 85  | troke       | 137 | mandrohny      | 189 | mahity       |
| 34 | maifitse  | 86  | tinay       | 138 | mitsebeke      | 190 | fohe         |
| 35 | matify    | 87  | vozo        | 139 | manisake       | 191 | maranitse    |
| 36 | ampisafe  | 88  | lambosy     | 140 | mivola         | 192 | madomoke     |
| 37 | lahilahy  | 89  | tratra      | 141 | miantsa        | 193 | madoso       |
| 38 | ndaty     | 90  | fo          | 142 | mihisa         | 194 | le           |
| 39 | ajaja     | 91  | aty         | 143 | mihafy         | 195 | maike        |
| 40 | roakemba  | 92  | mino        | 144 | mijia          | 196 | mete         |
| 41 | roandria  | 93  | mitava      | 145 | mandreke       | 197 | anila        |
| 42 | nene      | 94  | manehetse   | 146 | mivonto        | 198 | lavitse      |
| 43 | baba      | 95  | mitsintsike | 147 | masoandro      | 199 | ankavana     |
| 44 | biby      | 96  | mandrehoke  | 148 | vola           | 200 | ankavia      |
| 45 | fia       | 97  | mandoa      | 149 | kinta          | 201 | aroke        |
| 46 | voron     | 98  | mitioke     | 150 | rano           | 202 | ampo         |
| 47 | amboa     | 99  | miay        | 151 | ora            | 203 | amine        |
| 48 | hao       | 100 | homehe      | 152 | ranobey        | 204 | noho         |
| 49 | bibilava  | 101 | mahita      | 153 | dobo           | 205 | laha         |
| 50 | soko      | 102 | mijanjan    | 154 | riake          | 206 | satria       |
| 51 | hetae     | 103 | mahay       | 155 | sira           | 207 | anara        |
| 52 | ala       | 104 | mandineke   | 156 | vato           |     |              |

**28 - Vezo (Morombe)**

|    |             |     |            |     |                |     |             |
|----|-------------|-----|------------|-----|----------------|-----|-------------|
| 1  | zaho        | 53  | kobay      | 105 | manimbo        | 157 | fasy        |
| 2  | iha         | 54  | voankazo   | 106 | matahotse      | 158 | tsemboky    |
| 3  | ie          | 55  | voa        | 107 | miroro         | 159 | tokotany    |
| 4  | tsika       | 56  | ravy       | 108 | velo           | 160 | hiboke      |
| 5  | nareo       | 57  | fototse    | 109 | mate           | 161 | rahona      |
| 6  | rozy        | 58  | holinkazo  | 110 | mamono         | 162 | lanitse     |
| 7  | toy         | 59  | folera     | 111 | mialy          | 163 | tsioke      |
| 8  | zay         | 60  | akata      | 112 | mihaza         | 164 | ranomivonga |
| 9  | etoa        | 61  | hosy       | 113 | mamango        | 165 | vongandrano |
| 10 | ao          | 62  | holitse    | 114 | manapake       | 166 | setsoke     |
| 11 | ia          | 63  | hena       | 115 | mamake         | 167 | bolo        |
| 12 | ino         | 64  | lio        | 116 | mitomboke meso | 168 | lavenoke    |
| 13 | aia         | 65  | tahola     | 117 | mikihe         | 169 | tsofora     |
| 14 | ombia       | 66  | vonjake    | 118 | mihaly         | 170 | lala        |
| 15 | akory       | 67  | atoly      | 119 | milano         | 171 | vohitse     |
| 16 | tsy         | 68  | tsifa      | 120 | mitily         | 172 | mena        |
| 17 | iaby        | 69  | hohy       | 121 | mandehana      | 173 | maintso     |
| 18 | maro        | 70  | volomboro  | 122 | avy            | 174 | mavo        |
| 19 | tsiampeampe | 71  | volo       | 123 | miroro         | 175 | foty        |
| 20 | tsiampe     | 72  | loha       | 124 | mitoboke       | 176 | mainte      |
| 21 | hafa        | 73  | sofy       | 125 | mitsanga       | 177 | haly        |
| 22 | raike       | 74  | maso       | 126 | miodike        | 178 | anjo        |
| 23 | roe         | 75  | oro        | 127 | latsaky        | 179 | tao         |
| 24 | telo        | 76  | vava       | 128 | manome         | 180 | mafana      |
| 25 | efatse      | 77  | hy         | 129 | mifampitanjake | 181 | manintsy    |
| 26 | lime        | 78  | lela       | 130 | mitinndry      | 182 | feny        |
| 27 | bevata      | 79  | nao        | 131 | mampikasoke    | 183 | vaovao      |
| 28 | lava        | 80  | tomboke    | 132 | manasa         | 184 | antitse     |
| 29 | malalake    | 81  | randro     | 133 | mamafa         | 185 | soa         |
| 30 | mateve      | 82  | hongotsy   | 134 | mitifitse      | 186 | raty        |
| 31 | mavesatse   | 83  | tana       | 135 | manosike       | 187 | mavay       |
| 32 | kelikely    | 84  | helatsy    | 136 | manary         | 188 | maloto      |
| 33 | boriboriky  | 85  | sarotso    | 137 | mamehe         | 189 | mahite      |
| 34 | maifitse    | 86  | tinay      | 138 | mitsebike      | 190 | boriboriky  |
| 35 | matify      | 87  | vozo       | 139 | manisake       | 191 | maranitse   |
| 36 | ampela      | 88  | lambosy    | 140 | mivola         | 192 | madomoke    |
| 37 | johary      | 89  | tsatsa     | 141 | mihira         | 193 | madoso      |
| 38 | olo         | 90  | fo         | 142 | mihisa         | 194 | loba        |
| 39 | anakaja     | 91  | aty        | 143 | mihafy         | 195 | maike       |
| 40 | valy        | 92  | mino       | 144 | mitsororoke    | 196 | mete        |
| 41 | valy        | 93  | mihina     | 145 | manjike        | 197 | marine      |
| 42 | nene        | 94  | manehitse  | 146 | mivonto        | 198 | lavitse     |
| 43 | baba        | 95  | mitsitsike | 147 | masoanjo       | 199 | ankavana    |
| 44 | biby        | 96  | manjehoke  | 148 | vola           | 200 | ankavia     |
| 45 | fia         | 97  | mandoa     | 149 | basia          | 201 | ane         |
| 46 | voron       | 98  | mitsoke    | 150 | rano           | 202 | anaty       |
| 47 | alika       | 99  | miay       | 151 | ora            | 203 | ami y       |
| 48 | hao         | 100 | mihehy     | 152 | vavarano       | 204 | noho        |
| 49 | bibilava    | 101 | mahita     | 153 | kitoboke       | 205 | laha        |
| 50 | soko        | 102 | mijandry   | 154 | riake          | 206 | satsia      |
| 51 | hazo        | 103 | mahay      | 155 | sira           | 207 | anara       |
| 52 | ala         | 104 | mandinike  | 156 | vato           |     |             |

**29 - Antanosy (Bezaha)**

|    |            |     |             |     |                |     |              |
|----|------------|-----|-------------|-----|----------------|-----|--------------|
| 1  | zaho       | 53  | begegy      | 105 | magnitsy       | 157 | fasy         |
| 2  | iha        | 54  | tengnany    | 106 | matahosal      | 158 | lemboky      |
| 3  | izy        | 55  | vihiny      | 107 | mandry         | 159 | tany         |
| 4  | sika       | 56  | raviny      | 108 | velo           | 160 | mandrahony   |
| 5  | handreo    | 57  | vahany      | 109 | maty           | 161 | zavony       |
| 6  | lahireo    | 58  | holikazo    | 110 | namono         | 162 | langnisy     |
| 7  | itiho      | 59  | folera      | 111 | mialy          | 163 | rivosy       |
| 8  | zao        | 60  | akata       | 112 | mamita         | 164 | ranomihandro |
| 9  | etoa       | 61  | taly        | 113 | manjera        | 165 | ranomihandro |
| 10 | ao         | 62  | holisy      | 114 | manapaky       | 166 | setroky      |
| 11 | ija        | 63  | hena        | 115 | mamaky         | 167 | afo          |
| 12 | ino        | 64  | lio         | 116 | mitomboky mesa | 168 | lavenoky     |
| 13 | eza        | 65  | taola       | 117 | magnihy        | 169 | magnoro      |
| 14 | ombia      | 66  | vondrany    | 118 | mihaly         | 170 | lala         |
| 15 | akory      | 67  | atoly       | 119 | milagno        | 171 | vohisy       |
| 16 | sizy       | 68  | sifany      | 120 | mitily         | 172 | mena         |
| 17 | sikaby     | 69  | ohihy       | 121 | mandeha        | 173 | menso        |
| 18 | kidikidy   | 70  | volomboro   | 122 | avy            | 174 | mavo         |
| 19 | kelikeliky | 71  | vololo      | 123 | mandry         | 175 | fosy         |
| 20 | siampy     | 72  | loha        | 124 | mitoboky       | 176 | menty        |
| 21 | hafahafa   | 73  | sofy        | 125 | misanga        | 177 | hariva       |
| 22 | raiky      | 74  | maso        | 126 | miolaky        | 178 | andro        |
| 23 | ro         | 75  | oro         | 127 | lasaky         | 179 | tao          |
| 24 | telo       | 76  | vava        | 128 | manolosy       | 180 | mafana       |
| 25 | efasy      | 77  | nify        | 129 | mita           | 181 | manara       |
| 26 | dimy       | 78  | lela        | 130 | mitery         | 182 | feny         |
| 27 | befoloay   | 79  | vazakoho    | 131 | mikasoky       | 183 | vaovao       |
| 28 | lava       | 80  | tomboky     | 132 | manasa         | 184 | atisy        |
| 29 | malalaky   | 81  | randro      | 133 | mamafa         | 185 | soa          |
| 30 | matevine   | 82  | pokopoko    | 134 | mitifisy       | 186 | rasy         |
| 31 | mavesasy   | 83  | tagna       | 135 | manosiky       | 187 | lo           |
| 32 | masitiky   | 84  | elany       | 136 | mitoraky       | 188 | maloto       |
| 33 | boribory   | 85  | troky       | 137 | mamehy         | 189 | mahisy       |
| 34 | tery       | 86  | sinainy     | 138 | mazaisy        | 190 | boribory     |
| 35 | matify     | 87  | vozo        | 139 | magnisaky      | 191 | marangnisy   |
| 36 | apela      | 88  | lambosy     | 140 | mizaka         | 192 | dofoky       |
| 37 | rangahy    | 89  | harangna    | 141 | mibeko         | 193 | malama       |
| 38 | olo        | 90  | fo          | 142 | mihisa         | 194 | lende        |
| 39 | zaza       | 91  | atiny       | 143 | mihafy         | 195 | maiky        |
| 40 | valy       | 92  | mino        | 144 | mivary         | 196 | mety         |
| 41 | valy       | 93  | mihina      | 145 | miandrony      | 197 | mariniky     |
| 42 | reny       | 94  | manifasy    | 146 | mibognaky      | 198 | lavisy       |
| 43 | baba       | 95  | fiazao      | 147 | masoandro      | 199 | akavana      |
| 44 | biby       | 96  | mandrehoky  | 148 | volana         | 200 | akavia       |
| 45 | fia        | 97  | mandoa      | 149 | vasia          | 201 | agny         |
| 46 | voron      | 98  | misioky     | 150 | rano           | 202 | agnatiny     |
| 47 | amboa      | 99  | miay        | 151 | ora            | 203 | amin ny      |
| 48 | hao        | 100 | homehy      | 152 | renirano       | 204 | sy           |
| 49 | bibilava   | 101 | mahita      | 153 | farihy         | 205 | raha         |
| 50 | soko       | 102 | miteno      | 154 | riaky          | 206 | satria       |
| 51 | hazo       | 103 | mahay       | 155 | sira           | 207 | agnara       |
| 52 | ala        | 104 | mieriserisy | 156 | vato           |     |              |

### 30 - Tanala (Ifanadiana)

|    |           |     |               |     |                |     |                |
|----|-----------|-----|---------------|-----|----------------|-----|----------------|
| 1  | iaho      | 53  | salohy        | 105 | magnerana      | 157 | fasika         |
| 2  | ena       | 54  | isinjavatra   | 106 | vaka           | 158 | vovoka         |
| 3  | izy       | 55  | isy           | 107 | matory         | 159 | tany           |
| 4  | atsena    | 56  | ravy          | 108 | velo           | 160 | mika           |
| 5  | ianareo   | 57  | faka          | 109 | maty           | 161 | zavo           |
| 6  | izy ireo  | 58  | hodikazo      | 110 | mamono         | 162 | lanitry        |
| 7  | ity       | 59  | voninkazo     | 111 | miady          | 163 | rivotra        |
| 8  | izany     | 60  | ahitra        | 112 | miremby        | 164 | ranomivengany  |
| 9  | eto       | 61  | tady          | 113 | mikapoka       | 165 | ranomivengany  |
| 10 | atsy      | 62  | hoditra       | 114 | mandrasa       | 166 | setroky        |
| 11 | iza       | 63  | hena          | 115 | mamaky         | 167 | afo            |
| 12 | ino       | 64  | ra            | 116 | mifira antsy   | 168 | lakevo         |
| 13 | aiza      | 65  | taolana       | 117 | mikisiky       | 169 | mandoro        |
| 14 | vina      | 66  | taviny        | 118 | mangady        | 170 | lalana         |
| 15 | ahoana    | 67  | atody         | 119 | lomano         | 171 | tendrombohitra |
| 16 | tsy       | 68  | tandroka      | 120 | magnembony     | 172 | mena           |
| 17 | aby       | 69  | ohony         | 121 | mandeha        | 173 | metso          |
| 18 | maro      | 70  | volomborona   | 122 | tonga          | 174 | mavo           |
| 19 | vitsy     | 71  | vololo        | 123 | mandry         | 175 | fotsy          |
| 20 | kely      | 72  | loha          | 124 | mipetraka      | 176 | minty          |
| 21 | hafa      | 73  | tadiny        | 125 | mitsangana     | 177 | aliny          |
| 22 | iray      | 74  | maso          | 126 | mihodina       | 178 | andro          |
| 23 | roa       | 75  | orona         | 127 | latsaky        | 179 | tao            |
| 24 | telo      | 76  | vava          | 128 | matariky       | 180 | mevoky         |
| 25 | efatra    | 77  | nify          | 129 | mitana         | 181 | mangatsiaka    |
| 26 | dimy      | 78  | lela          | 130 | mipitsa        | 182 | feno           |
| 27 | lehibe    | 79  | vazakoho      | 131 | manakasoka     | 183 | vao            |
| 28 | lava      | 80  | tongotra      | 132 | manasa         | 184 | antitry        |
| 29 | malalaka  | 81  | randro        | 133 | mamafa         | 185 | tsara          |
| 30 | matevina  | 82  | lohalika      | 134 | mitifitra      | 186 | ratsy          |
| 31 | mavesatra | 83  | tanana        | 135 | manosika       | 187 | lo             |
| 32 | kidiky    | 84  | elatra        | 136 | mitoraky       | 188 | maloto         |
| 33 | fohy      | 85  | kibo          | 137 | mamehy         | 189 | mahitsy        |
| 34 | tery      | 86  | oliky         | 138 | manjaitra      | 190 | boribory       |
| 35 | manify    | 87  | vozona        | 139 | manisa         | 191 | maranitra      |
| 36 | viavy     | 88  | lamosina      | 140 | mizaka         | 192 | bofoky         |
| 37 | lehilahy  | 89  | tratra        | 141 | mihira         | 193 | malama         |
| 38 | olona     | 90  | fo            | 142 | mihira         | 194 | lena           |
| 39 | zaza      | 91  | aty           | 143 | mitsingevaheva | 195 | maina          |
| 40 | vady      | 92  | misotro       | 144 | mikoriana      | 196 | mety           |
| 41 | vady      | 93  | mihomana      | 145 | mandry         | 197 | marivo         |
| 42 | reny      | 94  | magnekitry    | 146 | voky           | 198 | lavitra        |
| 43 | ray       | 95  | manery        | 147 | masoandro      | 199 | havanana       |
| 44 | biby      | 96  | mandrehoka    | 148 | volany         | 200 | avia           |
| 45 | laoka     | 97  | mandoa        | 149 | kintana        | 201 | any            |
| 46 | vorona    | 98  | mitsoka       | 150 | rano           | 202 | anaty          |
| 47 | alika     | 99  | miaina        | 151 | orony          | 203 | amin ny        |
| 48 | hao       | 100 | mihomehy      | 152 | renirano       | 204 | de             |
| 49 | bibilava  | 101 | mahita        | 153 | do             | 205 | raha           |
| 50 | kankana   | 102 | miteno        | 154 | riaky          | 206 | satria         |
| 51 | hazo      | 103 | mahay         | 155 | sira           | 207 | anara          |
| 52 | ala       | 104 | mieritreritra | 156 | vato           |     |                |



### 31 - Bara (Ranohira)

|    |           |     |               |     |                |     |            |
|----|-----------|-----|---------------|-----|----------------|-----|------------|
| 1  | iaho      | 53  | kobay         | 105 | magnembo       | 157 | fasy       |
| 2  | anao      | 54  | voakazo       | 106 | matahotsy      | 158 | bo         |
| 3  | i         | 55  | vihy          | 107 | matory         | 159 | tany       |
| 4  | tsika     | 56  | ravy          | 108 | velo           | 160 | raho       |
| 5  | anareo    | 57  | vahatsy       | 109 | maty           | 161 | zavo       |
| 6  | reo       | 58  | holintsazo    | 110 | mamono         | 162 | lagnitsy   |
| 7  | toy       | 59  | vonikazo      | 111 | mialy          | 163 | tsioky     |
| 8  | zay       | 60  | akata         | 112 | miremby        | 164 | zavo       |
| 9  | eto       | 61  | taly          | 113 | mamofoky       | 165 | ranomandry |
| 10 | ao        | 62  | holitsy       | 114 | manapaky       | 166 | setroky    |
| 11 | ia        | 63  | hena          | 115 | manilaky       | 167 | afo        |
| 12 | ino       | 64  | ra            | 116 | mitomboky mesa | 168 | lavenoky   |
| 13 | aia       | 65  | tola          | 117 | hihisa         | 169 | magnodo    |
| 14 | ombia     | 66  | sabora        | 118 | mihaly         | 170 | lala       |
| 15 | akory     | 67  | atody         | 119 | milagno        | 171 | vohitsy    |
| 16 | tsy       | 68  | tsifa         | 120 | mitily         | 172 | mena       |
| 17 | aby       | 69  | ohiny         | 121 | mandeha        | 173 | metso      |
| 18 | lako      | 70  | volomboro     | 122 | avy            | 174 | vogny      |
| 19 | kidikidy  | 71  | volo          | 123 | mandry         | 175 | fotsy      |
| 20 | kidy      | 72  | loha          | 124 | mitoboky       | 176 | mety       |
| 21 | hafa      | 73  | sofy          | 125 | mitsanga       | 177 | hariva     |
| 22 | raiky     | 74  | maso          | 126 | mitodiky       | 178 | andro      |
| 23 | roy       | 75  | oro           | 127 | lavo           | 179 | tao        |
| 24 | telo      | 76  | vava          | 128 | manolotsy      | 180 | mafana     |
| 25 | efatsy    | 77  | hy            | 129 | mita           | 181 | manitsy    |
| 26 | dimy      | 78  | lela          | 130 | mamiaky        | 182 | feny       |
| 27 | foloay    | 79  | vazakoho      | 131 | mampikasoky    | 183 | vao        |
| 28 | abo       | 80  | tomboky       | 132 | manasa         | 184 | antitsy    |
| 29 | malalaky  | 81  | randro        | 133 | mamafa         | 185 | soa        |
| 30 | matevy    | 82  | pokopoko      | 134 | mitifitsy      | 186 | ratsy      |
| 31 | mavesatsy | 83  | tagna         | 135 | mandrosy       | 187 | lo         |
| 32 | kely      | 84  | elatsy        | 136 | manoraky       | 188 | motaky     |
| 33 | pohy      | 85  | troky         | 137 | mamehy         | 189 | mahitsy    |
| 34 | detsy     | 86  | tsinay        | 138 | mitrebiky      | 190 | boribory   |
| 35 | matify    | 87  | vozo          | 139 | magnisa        | 191 | maragnitsy |
| 36 | apela     | 88  | lambosy       | 140 | mitsara        | 192 | do         |
| 37 | lelahy    | 89  | tratra        | 141 | miantsa        | 193 | malama     |
| 38 | olo       | 90  | fo            | 142 | mihisa         | 194 | mando      |
| 39 | zaza      | 91  | aty           | 143 | mihefo         | 195 | maiky      |
| 40 | vady      | 92  | mino          | 144 | mandeha        | 196 | mety       |
| 41 | vady      | 93  | mihina        | 145 | mandry         | 197 | marikitsy  |
| 42 | neny      | 94  | magnehitsy    | 146 | mivonto        | 198 | lavitsy    |
| 43 | aba       | 95  | mitsetsiky    | 147 | tanonandroky   | 199 | havana     |
| 44 | biby      | 96  | mandora       | 148 | vola           | 200 | havia      |
| 45 | fia       | 97  | mandoa        | 149 | vasia          | 201 | agny       |
| 46 | voron     | 98  | mitsioky      | 150 | rano           | 202 | agnatiny   |
| 47 | amboa     | 99  | miay          | 151 | ora            | 203 | mindray    |
| 48 | hao       | 100 | mihehy        | 152 | vavarano       | 204 | la         |
| 49 | bibilava  | 101 | mahita        | 153 | ranovory       | 205 | laha       |
| 50 | haka      | 102 | maheno        | 154 | riaky          | 206 | satria     |
| 51 | hazo      | 103 | mahay         | 155 | sira           | 207 | agnara     |
| 52 | ala       | 104 | mieritseritsy | 156 | vato           |     |            |

### 32 - Antanalana (Manorofify)

|    |            |     |             |     |                |     |              |
|----|------------|-----|-------------|-----|----------------|-----|--------------|
| 1  | iaho       | 53  | kobay       | 105 | manimbo        | 157 | fase         |
| 2  | riha       | 54  | voankazo    | 106 | matahotse      | 158 | lemboke      |
| 3  | reke       | 55  | vihy        | 107 | miroro         | 159 | tane         |
| 4  | tika       | 56  | rave        | 108 | velo           | 160 | raho         |
| 5  | nareo      | 57  | vahatse     | 109 | mate           | 161 | manjavo      |
| 6  | iereo      | 58  | holitsetae  | 110 | mamono         | 162 | lanitse      |
| 7  | toy        | 59  | ravenkazo   | 111 | mialy          | 163 | tioke        |
| 8  | zane       | 60  | ahitse      | 112 | mihaza         | 164 | ranomandreke |
| 9  | etoa       | 61  | taly        | 113 | mamango        | 165 | ranomandreke |
| 10 | ao         | 62  | holitse     | 114 | manampake      | 166 | setroke      |
| 11 | ia         | 63  | hena        | 115 | mamaky         | 167 | afo          |
| 12 | ino        | 64  | lio         | 116 | mitomboke meso | 168 | lavenoke     |
| 13 | aia        | 65  | taola       | 117 | mandraotse     | 169 | manoro       |
| 14 | ombia      | 66  | vondrake    | 118 | mihaly         | 170 | lala         |
| 15 | akore      | 67  | atoly       | 119 | milano         | 171 | vohitse      |
| 16 | tsy        | 68  | tsifa       | 120 | mitily         | 172 | mena         |
| 17 | iaby       | 69  | ohy         | 121 | mandeha        | 173 | maintso      |
| 18 | maro       | 70  | volomboro   | 122 | avy            | 174 | vone         |
| 19 | vitsivitsy | 71  | volo        | 123 | mandre         | 175 | foty         |
| 20 | kele       | 72  | loha        | 124 | mipetrake      | 176 | mainte       |
| 21 | hafa       | 73  | sofy        | 125 | mitsanga       | 177 | hale         |
| 22 | raike      | 74  | maso        | 126 | mitolike       | 178 | andro        |
| 23 | roe        | 75  | oro         | 127 | mitonta        | 179 | tao          |
| 24 | telo       | 76  | vava        | 128 | manomey        | 180 | mae          |
| 25 | efatse     | 77  | hy          | 129 | mitanjake      | 181 | manintsy     |
| 26 | lime       | 78  | lela        | 130 | mitere         | 182 | atseke       |
| 27 | bevata     | 79  | hoho        | 131 | mikoseke       | 183 | vaovao       |
| 28 | lava       | 80  | tomboke     | 132 | manasa         | 184 | antetse      |
| 29 | malalake   | 81  | bositomboke | 133 | mamafa         | 185 | soa          |
| 30 | mateve     | 82  | ongotse     | 134 | mitifitse      | 186 | raty         |
| 31 | mavesatse  | 83  | tana        | 135 | manoseke       | 187 | lo           |
| 32 | kele       | 84  | elatse      | 136 | mitorake       | 188 | maloto       |
| 33 | boribory   | 85  | troke       | 137 | mandrohy       | 189 | mahity       |
| 34 | maifitse   | 86  | tinay       | 138 | mitrebeke      | 190 | fohe         |
| 35 | matify     | 87  | vozo        | 139 | manisake       | 191 | maranitse    |
| 36 | ampela     | 88  | lambosy     | 140 | mivola         | 192 | madomoke     |
| 37 | lahilahy   | 89  | tratra      | 141 | miantsa        | 193 | madoso       |
| 38 | ndaty      | 90  | fo          | 142 | misa           | 194 | mando        |
| 39 | aja        | 91  | ate         | 143 | mihafy         | 195 | maike        |
| 40 | valy       | 92  | mino        | 144 | milenteke      | 196 | mare         |
| 41 | valy       | 93  | mihina      | 145 | mandreke       | 197 | marine       |
| 42 | rene       | 94  | manehetse   | 146 | mivonto        | 198 | lavitse      |
| 43 | baba       | 95  | misintsike  | 147 | masoandro      | 199 | havana       |
| 44 | biby       | 96  | mandrehoke  | 148 | volane         | 200 | ankavia      |
| 45 | fia        | 97  | mandoa      | 149 | vasia          | 201 | ane          |
| 46 | voron      | 98  | mitsoke     | 150 | rano           | 202 | ampone       |
| 47 | ambo       | 99  | miay        | 151 | ora            | 203 | amy          |
| 48 | hao        | 100 | mihehe      | 152 | vavarano       | 204 | naho         |
| 49 | bibilava   | 101 | mahisake    | 153 | kotoboke       | 205 | laha         |
| 50 | soko       | 102 | mijanjan    | 154 | riake          | 206 | fa           |
| 51 | hetae      | 103 | mahay       | 155 | sira           | 207 | anara        |
| 52 | ala        | 104 | mandineke   | 156 | vato           |     |              |

### 33 - Antandroy (Toliara)

|    |                |     |               |     |             |     |                |
|----|----------------|-----|---------------|-----|-------------|-----|----------------|
| 1  | iraho          | 53  | kobay         | 105 | mamofontse  | 157 | fasegne        |
| 2  | irehe          | 54  | voa           | 106 | matahotse   | 158 | lemboke        |
| 3  | ihe            | 55  | voa e         | 107 | miroro      | 159 | tane           |
| 4  | itikagne       | 56  | rave e        | 108 | velogne     | 160 | rahogne        |
| 5  | inareo         | 57  | vaha e        | 109 | vilasy      | 161 | zavogne        |
| 6  | inareo io      | 58  | holinkazo     | 110 | mamono      | 162 | lagnitse       |
| 7  | intoy          | 59  | felankazo     | 111 | mialy       | 163 | rivotse        |
| 8  | izao           | 60  | boka          | 112 | magnaranto  | 164 | ranomivongagne |
| 9  | eto            | 61  | taly          | 113 | mijera      | 165 | ranomivongagne |
| 10 | ao             | 62  | sandry        | 114 | manampake   | 166 | setroke        |
| 11 | ia             | 63  | hena          | 115 | mamaky      | 167 | afo            |
| 12 | inogne         | 64  | lio           | 116 | mamiry      | 168 | lavenoke       |
| 13 | aiao           | 65  | taolagne      | 117 | magnofe     | 169 | magnoro        |
| 14 | ombiagne       | 66  | saborae       | 118 | mihaly      | 170 | lalagne        |
| 15 | akore          | 67  | atoly         | 119 | milaogne    | 171 | vohitse        |
| 16 | tsie           | 68  | tsifa         | 120 | mitiligne   | 172 | mena           |
| 17 | iaby           | 69  | hoie          | 121 | mandeha     | 173 | maintso        |
| 18 | tsiefa         | 70  | volomborogne  | 122 | avy         | 174 | mavo           |
| 19 | kidikidie      | 71  | volo          | 123 | mirotsy     | 175 | foty           |
| 20 | tsiampe        | 72  | agnamboe      | 124 | mitoboke    | 176 | mainte         |
| 21 | hafa           | 73  | ravindia      | 125 | mitsangagne | 177 | halegne        |
| 22 | raike          | 74  | fivajohoa     | 126 | mihodigne   | 178 | andro          |
| 23 | roe            | 75  | orogne        | 127 | mitonta     | 179 | taogne         |
| 24 | telo           | 76  | falie         | 128 | magnomey    | 180 | mafana         |
| 25 | efatse         | 77  | nife          | 129 | minday      | 181 | manintsy       |
| 26 | lime           | 78  | famelike      | 130 | misere      | 182 | feny           |
| 27 | bey            | 79  | hoho          | 131 | mampikasike | 183 | vaovao         |
| 28 | lava           | 80  | tomboke       | 132 | manasa      | 184 | antetse        |
| 29 | malalake       | 81  | taolamaigne   | 133 | mamafa      | 185 | soa            |
| 30 | matevegne      | 82  | ongotse       | 134 | mitifitse   | 186 | raty           |
| 31 | mavesatse      | 83  | tagnagne      | 135 | manoseke    | 187 | lo             |
| 32 | kede           | 84  | elatse        | 136 | mitorake    | 188 | maloto         |
| 33 | bory           | 85  | tsoke         | 137 | mamehe      | 189 | mahity         |
| 34 | tsiombe        | 86  | tsinay        | 138 | manjaitse   | 190 | borybory       |
| 35 | tsingarakarake | 87  | vozogne       | 139 | magnisake   | 191 | maragnitse     |
| 36 | ampela         | 88  | lambosigne    | 140 | mitalily    | 192 | bey            |
| 37 | lahilahy       | 89  | tratra        | 141 | miantsa     | 193 | malama         |
| 38 | ndaty          | 90  | arofo         | 142 | mihisa      | 194 | legne          |
| 39 | ajaja          | 91  | ate           | 143 | mihafogne   | 195 | maike          |
| 40 | valy           | 92  | minogne       | 144 | mandeha     | 196 | mete           |
| 41 | valy           | 93  | mihinagne     | 145 | mandre      | 197 | marine         |
| 42 | inene          | 94  | mitifatse     | 146 | mibokinake  | 198 | lavitse        |
| 43 | baba           | 95  | mihorogne     | 147 | masoandro   | 199 | havagne        |
| 44 | biby           | 96  | mikohake      | 148 | volagne     | 200 | havia          |
| 45 | fiagne         | 97  | mandoa        | 149 | kintagne    | 201 | agne           |
| 46 | vorogne        | 98  | mipoliotse    | 150 | rano        | 202 | agnate e       |
| 47 | amboa          | 99  | miaigne       | 151 | oragne      | 203 | ama e          |
| 48 | hao            | 100 | mihehe        | 152 | loharano    | 204 | sy             |
| 49 | meregne        | 101 | mahatsea      | 153 | saka        | 205 | raha           |
| 50 | kakagne        | 102 | mijajigne     | 154 | ranomasigne | 206 | naho           |
| 51 | hatagne        | 103 | mahafatitse   | 155 | sira        | 207 | agnaragne      |
| 52 | ala            | 104 | mieritseretse | 156 | vato        |     |                |

### 34 - Antanalana (Anakao)

|    |           |     |             |     |                |     |           |
|----|-----------|-----|-------------|-----|----------------|-----|-----------|
| 1  | iaho      | 53  | kobay       | 105 | manimbo        | 157 | fase      |
| 2  | riha      | 54  | voanketa    | 106 | matahotse      | 158 | lemboke   |
| 3  | reke      | 55  | voa         | 107 | miroro         | 159 | tane      |
| 4  | tsika     | 56  | rave        | 108 | velo           | 160 | raho      |
| 5  | nareo     | 57  | fototsy     | 109 | mate           | 161 | zavo      |
| 6  | iereo     | 58  | holinkazo   | 110 | mamono         | 162 | lanitsy   |
| 7  | intoke    | 59  | folera      | 111 | mialy          | 163 | tsioke    |
| 8  | zay       | 60  | ahetsy      | 112 | mihaza         | 164 | riko      |
| 9  | etoa      | 61  | taly        | 113 | mamango        | 165 | gilasy    |
| 10 | ao        | 62  | holitsy     | 114 | mandily        | 166 | setroke   |
| 11 | ia        | 63  | hena        | 115 | mizara         | 167 | afo       |
| 12 | ino       | 64  | lio         | 116 | mitomboke meso | 168 | lavenoke  |
| 13 | aia       | 65  | taola       | 117 | mikihy         | 169 | manoro    |
| 14 | ombia     | 66  | vondrany    | 118 | mihaly         | 170 | lala      |
| 15 | akore     | 67  | atoly       | 119 | milano         | 171 | vohitsy   |
| 16 | tsy       | 68  | tsifa       | 120 | mitily         | 172 | mena      |
| 17 | iaby      | 69  | ohy         | 121 | mandeha        | 173 | maintso   |
| 18 | maro      | 70  | volomboro   | 122 | avy            | 174 | mavo      |
| 19 | kelikely  | 71  | volo        | 123 | mandre         | 175 | foty      |
| 20 | kele      | 72  | loha        | 124 | mitoboke       | 176 | mainty    |
| 21 | hafa      | 73  | sofy        | 125 | mitsanga       | 177 | hale      |
| 22 | raiky     | 74  | maso        | 126 | miodiky        | 178 | andro     |
| 23 | roe       | 75  | oro         | 127 | mitonta        | 179 | tao       |
| 24 | telo      | 76  | vava        | 128 | manome         | 180 | may       |
| 25 | efatse    | 77  | hy          | 129 | mitanjake      | 181 | manintsy  |
| 26 | lime      | 78  | lela        | 130 | mipiritsy      | 182 | atsike    |
| 27 | bevata    | 79  | hoho        | 131 | mikoseke       | 183 | vaovao    |
| 28 | lava      | 80  | tomboke     | 132 | manasa         | 184 | antitsy   |
| 29 | malalake  | 81  | fiotsy      | 133 | mamafa         | 185 | soa       |
| 30 | mateve    | 82  | lohaliike   | 134 | mitifitsy      | 186 | raty      |
| 31 | mavesatse | 83  | tanake      | 135 | manosiky       | 187 | simba     |
| 32 | kele      | 84  | elatsy      | 136 | manoraky       | 188 | maloto    |
| 33 | boribory  | 85  | troke       | 137 | mandrohy       | 189 | mahity    |
| 34 | maifitsy  | 86  | tinay       | 138 | mitrebeke      | 190 | boribory  |
| 35 | matify    | 87  | vozo        | 139 | manisake       | 191 | maranetse |
| 36 | ampisafe  | 88  | lambosy     | 140 | mivola         | 192 | domoke    |
| 37 | jiahy     | 89  | tratra      | 141 | miantsa        | 193 | midisa    |
| 38 | ndaty     | 90  | fo          | 142 | mihisa         | 194 | le        |
| 39 | aja       | 91  | aty         | 143 | mihafo         | 195 | maiky     |
| 40 | valy      | 92  | mino        | 144 | migororosy     | 196 | mete      |
| 41 | valy      | 93  | homa        | 145 | mimpandriky    | 197 | marine    |
| 42 | nene      | 94  | manehetse   | 146 | mivonto        | 198 | lavitsy   |
| 43 | baba      | 95  | minono      | 147 | masoandro      | 199 | longo     |
| 44 | biby      | 96  | mandrehoke  | 148 | vola           | 200 | havia     |
| 45 | fia       | 97  | mandoa      | 149 | vasia          | 201 | any       |
| 46 | voron     | 98  | mitsoke     | 150 | rano           | 202 | anaty     |
| 47 | amboa     | 99  | miay        | 151 | ora            | 203 | amine     |
| 48 | hao       | 100 | homehe      | 152 | renerano       | 204 | noho      |
| 49 | bibilava  | 101 | mahita      | 153 | kotoboky       | 205 | laha      |
| 50 | tsoko     | 102 | mijanjanjy  | 154 | riake          | 206 | satria    |
| 51 | keta      | 103 | mahaony     | 155 | sira           | 207 | anara     |
| 52 | ala       | 104 | mieretsetse | 156 | vato           |     |           |

### 35 - Betsimisaraka (Marolambo)

|    |           |     |                |     |               |     |                |
|----|-----------|-----|----------------|-----|---------------|-----|----------------|
| 1  | iao       | 53  | fioka          | 105 | miorogna      | 157 | fasika         |
| 2  | ano       | 54  | vonkazo        | 106 | matahotra     | 158 | vovoka         |
| 3  | ie        | 55  | vihy           | 107 | mandry        | 159 | tane           |
| 4  | ansena    | 56  | ravina         | 108 | velona        | 160 | raona          |
| 5  | anaro     | 57  | vahatra        | 109 | mate          | 161 | zavona         |
| 6  | zaro      | 58  | hoditra kakazo | 110 | mamono        | 162 | lanitra        |
| 7  | ty        | 59  | voninkazo      | 111 | mamango       | 163 | rivotra        |
| 8  | iane      | 60  | ahitra         | 112 | mitadia       | 164 | ranomandry     |
| 9  | aketo     | 61  | tade           | 113 | mamango       | 165 | ranomandry     |
| 10 | ako       | 62  | oditra         | 114 | manapaka      | 166 | toesina        |
| 11 | ive       | 63  | ena            | 115 | mizara        | 167 | afo            |
| 12 | ino       | 64  | elatra         | 116 | manombok anse | 168 | lavenina       |
| 13 | akaia     | 65  | tolagna        | 117 | mikiky        | 169 | magnoro        |
| 14 | oviana    | 66  | menagny        | 118 | mangade       | 170 | lalana         |
| 15 | aona      | 67  | atode          | 119 | mandagno      | 171 | tendrombohitra |
| 16 | sy        | 68  | tandroka       | 120 | mirigna       | 172 | mena           |
| 17 | ziaby     | 69  | volombody      | 121 | mandeha       | 173 | meso           |
| 18 | maro      | 70  | volomborogna   | 122 | tonga         | 174 | mavo           |
| 19 | visivise  | 71  | randrana       | 123 | mandry        | 175 | fose           |
| 20 | bitaka    | 72  | loha           | 124 | mipetraka     | 176 | mintina        |
| 21 | afa       | 73  | tadigne        | 125 | misangana     | 177 | alina          |
| 22 | reka      | 74  | maso           | 126 | miodigna      | 178 | andro          |
| 23 | roe       | 75  | orogna         | 127 | lavo          | 179 | taona          |
| 24 | telo      | 76  | vava           | 128 | magnome       | 180 | mafana         |
| 25 | efara     | 77  | nife           | 129 | mitantana     | 181 | manara         |
| 26 | dime      | 78  | lela           | 130 | mampipositra  | 182 | feny           |
| 27 | lebe      | 79  | angofo         | 131 | mampikasoka   | 183 | vovo           |
| 28 | lava      | 80  | ongotra        | 132 | manasa        | 184 | antitra        |
| 29 | matahitra | 81  | randro         | 133 | mamafa        | 185 | sara           |
| 30 | matevina  | 82  | lohalitra      | 134 | mitifitra     | 186 | rase           |
| 31 | mavesara  | 83  | tagnana        | 135 | manosika      | 187 | lo             |
| 32 | bitaka    | 84  | elara          | 136 | mambalavala   | 188 | maloto         |
| 33 | fohika    | 85  | kibo           | 137 | mampitohy     | 189 | mahise         |
| 34 | tere      | 86  | olika          | 138 | manzetra      | 190 | tabolabola     |
| 35 | manife    | 87  | vozogna        | 139 | magnisa       | 191 | marangitra     |
| 36 | viave     | 88  | tambokoka      | 140 | mizaka        | 192 | malombona      |
| 37 | lilae     | 89  | tratra         | 141 | mihira        | 193 | malady         |
| 38 | olo       | 90  | fo             | 142 | milalo        | 194 | mando          |
| 39 | iaia      | 91  | ate            | 143 | miboagna      | 195 | megna          |
| 40 | vade      | 92  | midroka        | 144 | midoroka      | 196 | mety           |
| 41 | vade      | 93  | mihinana       | 145 | mampivaingana | 197 | marivo         |
| 42 | mama      | 94  | magnekitra     | 146 | mibonsigna    | 198 | lavitra        |
| 43 | iaba      | 95  | misestra       | 147 | masoandro     | 199 | havanana       |
| 44 | bibe      | 96  | mandrehoka     | 148 | volana        | 200 | havia          |
| 45 | loka      | 97  | mandoa         | 149 | kintana       | 201 | agny           |
| 46 | vorogna   | 98  | misotra        | 150 | rano          | 202 | agnaty         |
| 47 | kiva      | 99  | malak egna     | 151 | orana         | 203 | miaraka aminny |
| 48 | o         | 100 | mimehy         | 152 | tegnarano     | 204 | sy             |
| 49 | bibilava  | 101 | mizaha         | 153 | farihy        | 205 | raha           |
| 50 | ankagna   | 102 | miteno         | 154 | ranomasina    | 206 | satria         |
| 51 | kakazo    | 103 | mahe           | 155 | sira          | 207 | agnarana       |
| 52 | atiala    | 104 | mieritreritra  | 156 | vato          |     |                |

**36 - Betsimisaraka (Antsiranana)**

|    |            |     |              |     |                |     |                |
|----|------------|-----|--------------|-----|----------------|-----|----------------|
| 1  | za         | 53  | kobay        | 105 | mifofogno      | 157 | jia            |
| 2  | anao       | 54  | voankazo     | 106 | mavozo         | 158 | vovoko         |
| 3  | izy        | 55  | voany        | 107 | mandry         | 159 | tany           |
| 4  | atsika     | 56  | ravina       | 108 | velogno        | 160 | rondro         |
| 5  | anaro      | 57  | faka         | 109 | maty           | 161 | zavogno        |
| 6  | ro         | 58  | hodikazo     | 110 | mamono         | 162 | lanitra        |
| 7  | ity        | 59  | voninkazo    | 111 | miady          | 163 | tsiko          |
| 8  | zegny      | 60  | ahitra       | 112 | mizaha         | 164 | ranomanintsy   |
| 9  | eto        | 61  | tady         | 113 | mamopoko       | 165 | ranomanintsy   |
| 10 | ao         | 62  | hoditra      | 114 | manapaka       | 166 | setroko        |
| 11 | azovy      | 63  | hena         | 115 | mamaky         | 167 | motro          |
| 12 | ino        | 64  | lio          | 116 | mitomboko meso | 168 | lavenogno      |
| 13 | ahia       | 65  | taolagna     | 117 | mikiky         | 169 | may            |
| 14 | ombiagna   | 66  | taviny       | 118 | mangaty        | 170 | lalagna        |
| 15 | akory      | 67  | atody        | 119 | milamano       | 171 | tendrombohitra |
| 16 | tsy        | 68  | tandroko     | 120 | mitiligny      | 172 | mena           |
| 17 | jiaby      | 69  | vorimbody    | 121 | mandeha        | 173 | maitso         |
| 18 | maro       | 70  | volomborona  | 122 | avy            | 174 | mavo           |
| 19 | vitsivitsy | 71  | fagneva      | 123 | mandry         | 175 | fotsy          |
| 20 | hely       | 72  | loha         | 124 | mipetraka      | 176 | joby           |
| 21 | hafa       | 73  | sofigny      | 125 | mitsangana     | 177 | aligny         |
| 22 | araiky     | 74  | maso         | 126 | mihodigny      | 178 | andra          |
| 23 | aroe       | 75  | orogno       | 127 | lavo           | 179 | taogno         |
| 24 | telo       | 76  | vava         | 128 | magnamia       | 180 | mafana         |
| 25 | efatra     | 77  | nify         | 129 | mitana         | 181 | manintsy       |
| 26 | dimy       | 78  | lela         | 130 | manery         | 182 | feny           |
| 27 | be         | 79  | angofy       | 131 | manakasoka     | 183 | vaovao         |
| 28 | lava       | 80  | vity         | 132 | manasa         | 184 | matoe          |
| 29 | malalaka   | 81  | fehy         | 133 | mamafa         | 185 | tsara          |
| 30 | matevigny  | 82  | lohalika     | 134 | mitiritiry     | 186 | ratsy          |
| 31 | mavesatra  | 83  | tagnana      | 135 | magnaposy      | 187 | lo             |
| 32 | hely       | 84  | elatra       | 136 | mitoraka       | 188 | maloto         |
| 33 | foky       | 85  | kibo         | 137 | mamery         | 189 | mahitsy        |
| 34 | tery       | 86  | tsontsory    | 138 | manjaitry      | 190 | boribory       |
| 35 | matify     | 87  | vozogno      | 139 | miconty        | 191 | marangitry     |
| 36 | viavy      | 88  | taezagna     | 140 | mivolagna      | 192 | magofogno      |
| 37 | lela       | 89  | tratra       | 141 | mihira         | 193 | malamatra      |
| 38 | olo        | 90  | fo           | 142 | misaoma        | 194 | matsitsiky     |
| 39 | tsaiky     | 91  | aty          | 143 | mihempe        | 195 | maiky          |
| 40 | vady       | 92  | migiaka      | 144 | milentiky      | 196 | mety           |
| 41 | vady       | 93  | mhina        | 145 | mandry         | 197 | marigny        |
| 42 | reny       | 94  | magnekitry   | 146 | mibotaka       | 198 | lavitra        |
| 43 | ray        | 95  | minono       | 147 | masoandro      | 199 | havananana     |
| 44 | biby       | 96  | mandoa       | 148 | volagna        | 200 | avia           |
| 45 | loko       | 97  | mandrora     | 149 | lakitagna      | 201 | havia          |
| 46 | vorogno    | 98  | mifiko       | 150 | rano           | 202 | agnaty         |
| 47 | amboa      | 99  | miaigny      | 151 | malegny        | 203 | amin ny        |
| 48 | fagnofaka  | 100 | mitokiky     | 152 | renirano       | 204 | sy             |
| 49 | bibilava   | 101 | mahita       | 153 | mantsabory     | 205 | raha           |
| 50 | ankana     | 102 | mitandregny  | 154 | ranomasigny    | 206 | satria         |
| 51 | kakazo     | 103 | mahay        | 155 | sira           | 207 | agnarana       |
| 52 | atihala    | 104 | miertitritry | 156 | vato           |     |                |

### 37 - Betsimisaraka (Brickaville)

|    |           |     |               |     |                |     |               |
|----|-----------|-----|---------------|-----|----------------|-----|---------------|
| 1  | zao       | 53  | kakazo        | 105 | marigny        | 157 | fasika        |
| 2  | ano       | 54  | vonkazo       | 106 | vaka           | 158 | vovoka        |
| 3  | izy       | 55  | vihiny        | 107 | mandry         | 159 | rtany         |
| 4  | antsena   | 56  | ravina        | 108 | vile           | 160 | raona         |
| 5  | andrio    | 57  | fekany        | 109 | maty           | 161 | zavogna       |
| 6  | zario     | 58  | fotiny        | 110 | mamono         | 162 | lanitra       |
| 7  | ity       | 59  | flera         | 111 | miady          | 163 | rivotra       |
| 8  | zany      | 60  | ahitra        | 112 | miaza          | 164 | ranomivengana |
| 9  | akito     | 61  | tady          | 113 | mampoka        | 165 | ranomivengana |
| 10 | ako       | 62  | hoditra       | 114 | manapaka       | 166 | sitroka       |
| 11 | izovy     | 63  | ena           | 115 | mizara         | 167 | afo           |
| 12 | ino       | 64  | ra            | 116 | manombok antsy | 168 | levogna       |
| 13 | akeza     | 65  | tolagna       | 117 | mangaroaro     | 169 | mandoro       |
| 14 | oviana    | 66  | taviny        | 118 | mangady        | 170 | lalana        |
| 15 | akory     | 67  | atody         | 119 | mandagno       | 171 | tambo         |
| 16 | tsia      | 68  | tandroka      | 120 | magnembana     | 172 | mena          |
| 17 | jiaby     | 69  | rambo         | 121 | mandeha        | 173 | mitso         |
| 18 | maro      | 70  | volom borogna | 122 | avy            | 174 | mavo          |
| 19 | vitsy     | 71  | randrana      | 123 | mandry         | 175 | fotsy         |
| 20 | bitika    | 72  | loa           | 124 | mipetraka      | 176 | mintina       |
| 21 | hafa      | 73  | tadigny       | 125 | mitsangana     | 177 | ale           |
| 22 | reka      | 74  | moso          | 126 | miodigna       | 178 | mandrena      |
| 23 | roy       | 75  | orogno        | 127 | lavo           | 179 | tona          |
| 24 | telo      | 76  | vava          | 128 | magnamia       | 180 | mamovoka      |
| 25 | efatra    | 77  | nify          | 129 | mitana         | 181 | mangatsiaka   |
| 26 | dimy      | 78  | lela          | 130 | mitiry         | 182 | feno          |
| 27 | mavinty   | 79  | angofo        | 131 | magnakasoka    | 183 | vovo          |
| 28 | lava      | 80  | tongotra      | 132 | manasa         | 184 | antitra       |
| 29 | malalaka  | 81  | vovitsy       | 133 | firina         | 185 | tsara         |
| 30 | mativina  | 82  | loalika       | 134 | mitifitra      | 186 | ratsy         |
| 31 | mavesatra | 83  | tagnana       | 135 | manosika       | 187 | lo            |
| 32 | bitika    | 84  | elatra        | 136 | manoratra      | 188 | maloto        |
| 33 | fohika    | 85  | kibo          | 137 | mamihy         | 189 | mahitsy       |
| 34 | tiry      | 86  | tsine         | 138 | manjetra       | 190 | boribory      |
| 35 | manify    | 87  | tenda         | 139 | magnisa        | 191 | marangitra    |
| 36 | viavy     | 88  | lamosigny     | 140 | mizaka         | 192 | dombo         |
| 37 | lilay     | 89  | tratra        | 141 | mihira         | 193 | malama        |
| 38 | ole       | 90  | fo            | 142 | midola         | 194 | lina          |
| 39 | zaza      | 91  | aty           | 143 | mihimpo        | 195 | megna         |
| 40 | vady      | 92  | midroka       | 144 | midroka        | 196 | mety          |
| 41 | vady      | 93  | minana        | 145 | mivengana      | 197 | marivo        |
| 42 | riny      | 94  | mangikitra    | 146 | mibotsogna     | 198 | lavitra       |
| 43 | ray       | 95  | mitsitsitra   | 147 | masoandro      | 199 | avanana       |
| 44 | biky      | 96  | mandrioka     | 148 | volana         | 200 | avia          |
| 45 | loka      | 97  | mandoa        | 149 | kintana        | 201 | agny          |
| 46 | vorogna   | 98  | misotra       | 150 | rano           | 202 | agnaty        |
| 47 | kiva      | 99  | miegna        | 151 | oragna         | 203 | miaraka       |
| 48 | ho        | 100 | mivagnitika   | 152 | tsiragnana     | 204 | de            |
| 49 | bibilava  | 101 | maita         | 153 | fariy          | 205 | ko            |
| 50 | ankagna   | 102 | mitino        | 154 | ranomasina     | 206 | satria        |
| 51 | kakazo    | 103 | mae           | 155 | sira           | 207 | agnarana      |
| 52 | ala       | 104 | mieritreritra | 156 | vato           |     |               |

**38 - Betsimisaraka (Toamasina)**

|    |            |     |               |     |                    |     |                |
|----|------------|-----|---------------|-----|--------------------|-----|----------------|
| 1  | zaho       | 53  | fioka         | 105 | mifofogna          | 157 | fasika         |
| 2  | ano        | 54  | vihy          | 106 | matahotra          | 158 | vovoka         |
| 3  | izy        | 55  | ravigna       | 107 | mandry             | 159 | tany           |
| 4  | antsika    | 56  | fototra       | 108 | velogna            | 160 | rahogna        |
| 5  | anareo     | 57  | hoditry       | 109 | maty               | 161 | zavogna        |
| 6  | zare       | 58  | folera        | 110 | mamono             | 162 | lanitra        |
| 7  | ity        | 59  | ahitra        | 111 | miady              | 163 | rivotra        |
| 8  | njany      | 60  | ahitra        | 112 | mihaza             | 164 | ranomandry     |
| 9  | aketo      | 61  | tady          | 113 | mamango            | 165 | ranomandry     |
| 10 | indrogna   | 62  | hoditra       | 114 | manapaka           | 166 | mifoka         |
| 11 | zovy       | 63  | hena          | 115 | mirasa             | 167 | afo            |
| 12 | ino        | 64  | ra            | 116 | magnatsatoka antsy | 168 | lavenogno      |
| 13 | akeza      | 65  | taolagna      | 117 | magnisika          | 169 | mandoro        |
| 14 | oviagna    | 66  | tavy          | 118 | mangady            | 170 | lalana         |
| 15 | ahoana     | 67  | atody         | 119 | mandagno           | 171 | tendrombohitra |
| 16 | tsy        | 68  | tandroka      | 120 | magnembagna        | 172 | mena           |
| 17 | jiaby      | 69  | volombody     | 121 | mandeha            | 173 | mentso         |
| 18 | maro       | 70  | volomborogna  | 122 | avy                | 174 | mavo           |
| 19 | bitibitika | 71  | randragna     | 123 | mandry             | 175 | fotsy          |
| 20 | bitika     | 72  | loha          | 124 | mantotry           | 176 | mintigna       |
| 21 | hafa       | 73  | tadigny       | 125 | mitsangana         | 177 | aligna         |
| 22 | areka      | 74  | maso          | 126 | mihodigna          | 178 | andro          |
| 23 | aro        | 75  | orogna        | 127 | lavo               | 179 | taogno         |
| 24 | telo       | 76  | vava          | 128 | magnome            | 180 | mafana         |
| 25 | efatra     | 77  | nify          | 129 | mitatagna          | 181 | mangatsiaka    |
| 26 | dimy       | 78  | lela          | 130 | manery             | 182 | feno           |
| 27 | ngeza      | 79  | angofo        | 131 | magnakasoka        | 183 | vovo           |
| 28 | lava       | 80  | tongotra      | 132 | manasa             | 184 | antitry        |
| 29 | matahitra  | 81  | randro        | 133 | mamafa             | 185 | tsara          |
| 30 | matevigna  | 82  | lohalitra     | 134 | mitifitra          | 186 | ratsy          |
| 31 | mavesatra  | 83  | tagnana       | 135 | manosika           | 187 | lo             |
| 32 | bitika     | 84  | elatra        | 136 | manipy             | 188 | maloto         |
| 33 | fohika     | 85  | kibo          | 137 | manohy             | 189 | mahitsy        |
| 34 | hety       | 86  | tsine         | 138 | manjetra           | 190 | boribory       |
| 35 | manify     | 87  | vozogna       | 139 | magnisa            | 191 | marangitra     |
| 36 | viavy      | 88  | tambokoka     | 140 | mivolagna          | 192 | dombo          |
| 37 | lilahy     | 89  | tratra        | 141 | mihira             | 193 | malama         |
| 38 | ologna     | 90  | fo            | 142 | midola             | 194 | mando          |
| 39 | zaza       | 91  | aty           | 143 | mitsingevagna      | 195 | megna          |
| 40 | vady       | 92  | misotro       | 144 | mikoriagna         | 196 | marigna        |
| 41 | vady       | 93  | mihinagna     | 145 | mivengagna         | 197 | marivo         |
| 42 | mama       | 94  | magnekitra    | 146 | mibotsigna         | 198 | lavitra        |
| 43 | papa       | 95  | mitetsitra    | 147 | masoandro          | 199 | havanagna      |
| 44 | biby       | 96  | mandrehoka    | 148 | volagna            | 200 | havia          |
| 45 | laoko      | 97  | mandoa        | 149 | kintagna           | 201 | akagny         |
| 46 | vorogno    | 98  | mitsotra      | 150 | rano               | 202 | agnaty         |
| 47 | kiva       | 99  | miaigna       | 151 | oragnandro         | 203 | amin ny        |
| 48 | hao        | 100 | mimoehy       | 152 | tegnarano          | 204 | sy             |
| 49 | bibilava   | 101 | mahita        | 153 | farihy             | 205 | raha           |
| 50 | ankagna    | 102 | mitandregny   | 154 | ranomasigna        | 206 | satria         |
| 51 | kakazo     | 103 | mahafantatra  | 155 | sira               | 207 | agnaragna      |
| 52 | atiala     | 104 | mieritreritra | 156 | vato               |     |                |



### 39 - Betsimisaraka (Mananara)

|    |            |     |                |     |              |     |             |
|----|------------|-----|----------------|-----|--------------|-----|-------------|
| 1  | zaho       | 53  | koboay         | 105 | mifofogno    | 157 | halagnana   |
| 2  | ana        | 54  | voankazo       | 106 | matahotra    | 158 | vovoko      |
| 3  | izy        | 55  | vihiny         | 107 | mandry       | 159 | tany        |
| 4  | atsika     | 56  | ravigny        | 108 | velogno      | 160 | rondro      |
| 5  | are        | 57  | vahiny         | 109 | maty         | 161 | zavogno     |
| 6  | zare       | 58  | hoditry kakazo | 110 | mamono       | 162 | lanitry     |
| 7  | ito        | 59  | folera         | 111 | miady        | 163 | rivotro     |
| 8  | zegny      | 60  | ahitry         | 112 | mizora       | 164 | glasy       |
| 9  | aketo      | 61  | tady           | 113 | mamopoko     | 165 | glasy       |
| 10 | aka        | 62  | hoditry        | 114 | manapaka     | 166 | emboko      |
| 11 | zovy       | 63  | hena           | 115 | mamaky       | 167 | afo         |
| 12 | ino        | 64  | ra             | 116 | monombo kiso | 168 | jofo        |
| 13 | aiza       | 65  | taholagna      | 117 | mikiky       | 169 | magnoro     |
| 14 | aforiagna  | 66  | taviny         | 118 | mangady      | 170 | lalagna     |
| 15 | karakory   | 67  | antody         | 119 | milomagno    | 171 | tanety      |
| 16 | ehe        | 68  | tandroko       | 120 | manidigny    | 172 | mena        |
| 17 | jiaby      | 69  | vilimbondiny   | 121 | mandeha      | 173 | maitso      |
| 18 | fontry     | 70  | volovolony     | 122 | avy          | 174 | hasaka      |
| 19 | hely       | 71  | vorondoha      | 123 | mandry       | 175 | fotsy       |
| 20 | hely       | 72  | talandoha      | 124 | mantotry     | 176 | maintigny   |
| 21 | hafa       | 73  | tadigny        | 125 | mitsangana   | 177 | aligny      |
| 22 | araiky     | 74  | maso           | 126 | mihodigny    | 178 | andro       |
| 23 | aro        | 75  | orogno         | 127 | lavo         | 179 | taogno      |
| 24 | telo       | 76  | vava           | 128 | mangame      | 180 | mafana      |
| 25 | efatra     | 77  | nify           | 129 | mitantagna   | 181 | mangatsiaka |
| 26 | dimy       | 78  | lela           | 130 | manery       | 182 | feny        |
| 27 | maventy    | 79  | angofo         | 131 | magnakasiky  | 183 | vao         |
| 28 | lava       | 80  | hongotro       | 132 | manasa       | 184 | antitry     |
| 29 | malalaka   | 81  | vavitsy        | 133 | mamafa       | 185 | tsara       |
| 30 | matomboko  | 82  | lohalitry      | 134 | mitifitry    | 186 | ratsy       |
| 31 | mavesatra  | 83  | tanagna        | 135 | manosiky     | 187 | iho         |
| 32 | madiniky   | 84  | helatra        | 136 | manoraka     | 188 | maloto      |
| 33 | fohy       | 85  | boko           | 137 | mamehy       | 189 | mahitsy     |
| 34 | maety      | 86  | tsinay         | 138 | manjaitry    | 190 | boribory    |
| 35 | matify     | 87  | ambozogno      | 139 | magnisa      | 191 | maragnitry  |
| 36 | viavy      | 88  | tahezagna      | 140 | mivolagna    | 192 | lentigny    |
| 37 | lalahy     | 89  | tratra         | 141 | mihira       | 193 | malamatra   |
| 38 | olo        | 90  | fo             | 142 | midaola      | 194 | mandoa      |
| 39 | gamadiniky | 91  | aty            | 143 | miempo       | 195 | maigny      |
| 40 | vady       | 92  | homagna        | 144 | mikoriagna   | 196 | manjary     |
| 41 | vady       | 93  | homagna        | 145 | mandry       | 197 | mariny      |
| 42 | mama       | 94  | magnekitry     | 146 | mivonto      | 198 | lavitry     |
| 43 | baba       | 95  | milelatra      | 147 | masova       | 199 | akavanana   |
| 44 | kaka       | 96  | mandrehoko     | 148 | davolagna    | 200 | ankavia     |
| 45 | loko       | 97  | mandoa         | 149 | lakitagna    | 201 | angy        |
| 46 | vorogno    | 98  | milefa         | 150 | rano         | 202 | angatiny    |
| 47 | kiva       | 99  | miaigny        | 151 | oragnandro   | 203 | aminy       |
| 48 | hao        | 100 | mimoehy        | 152 | tegna rano   | 204 | sy          |
| 49 | biby       | 101 | mahita         | 153 | farihy       | 205 | koa         |
| 50 | hankagna   | 102 | mitandregny    | 154 | ranomasigny  | 206 | satria      |
| 51 | kakazo     | 103 | mahay          | 155 | sira         | 207 | agnaragna   |
| 52 | atiala     | 104 | mieritreritra  | 156 | vato         |     |             |

### 40 - Tsimihety (Mampikony)

|    |           |     |              |     |               |     |               |
|----|-----------|-----|--------------|-----|---------------|-----|---------------|
| 1  | zaho      | 53  | kobay        | 105 | maharegny     | 157 | alagnagna     |
| 2  | anao      | 54  | voankazo     | 106 | matahotro     | 158 | jofo          |
| 3  | izy       | 55  | ambeo        | 107 | mandry        | 159 | tany          |
| 4  | atsika    | 56  | ravigny      | 108 | velogno       | 160 | rondro        |
| 5  | areo      | 57  | vahany       | 109 | maty          | 161 | zavogno       |
| 6  | zareo     | 58  | hodikakazo   | 110 | mamono        | 162 | lagnitry      |
| 7  | toy       | 59  | felagna      | 111 | miady         | 163 | rivotro       |
| 8  | zany      | 60  | ahitry       | 112 | mijoko        | 164 | lanezy        |
| 9  | aketo     | 61  | tady         | 113 | mamiko        | 165 | gilasy        |
| 10 | aroy      | 62  | hoditry      | 114 | manapaka      | 166 | tsemboko      |
| 11 | azovy     | 63  | hena         | 115 | mamaky        | 167 | motro         |
| 12 | ino       | 64  | lio          | 116 | manomboko     | 168 | jofo          |
| 13 | aiza      | 65  | taholagna    | 117 | mikiky        | 169 | magnoro       |
| 14 | afriagna  | 66  | jabora       | 118 | mangady       | 170 | lalagna       |
| 15 | nagnakory | 67  | atody        | 119 | milomagno     | 171 | tanety        |
| 16 | aza       | 68  | ampondo      | 120 | magnembagna   | 172 | mena          |
| 17 | jiaby     | 69  | rambo        | 121 | mandeha       | 173 | maitso        |
| 18 | fontry    | 70  | volomborogno | 122 | avy           | 174 | fondragna     |
| 19 | vitsy     | 71  | volo         | 123 | mandry        | 175 | fotsy         |
| 20 | hely      | 72  | loha         | 124 | mantontry     | 176 | mahintigny    |
| 21 | hafa      | 73  | sofigny      | 125 | mitsangana    | 177 | aligny        |
| 22 | araiky    | 74  | maso         | 126 | mihodigny     | 178 | andro         |
| 23 | aroa      | 75  | horogno      | 127 | lavo          | 179 | taogno        |
| 24 | telo      | 76  | vava         | 128 | magname       | 180 | mafana        |
| 25 | efatra    | 77  | nify         | 129 | mitagna       | 181 | manintsy      |
| 26 | dimy      | 78  | lela         | 130 | mitery        | 182 | feny          |
| 27 | geda      | 79  | angofo       | 131 | mandrokotro   | 183 | vaovao        |
| 28 | lava      | 80  | tongotro     | 132 | manasa        | 184 | antitry       |
| 29 | malalaka  | 81  | bokombavitsy | 133 | mamafa        | 185 | tsara         |
| 30 | matevigny | 82  | lohalitry    | 134 | mitifitry     | 186 | ratsy         |
| 31 | mavesatra | 83  | tanagna      | 135 | manosiky      | 187 | lo            |
| 32 | hely      | 84  | helatra      | 136 | manopy        | 188 | maloto        |
| 33 | fohy      | 85  | kibo         | 137 | manohy        | 189 | mahitsy       |
| 34 | mahety    | 86  | tsinay       | 138 | manjaitry     | 190 | taboribory    |
| 35 | matify    | 87  | vozogno      | 139 | magnisa       | 191 | marangitry    |
| 36 | vaiavy    | 88  | tahezagna    | 140 | magnamabara   | 192 | malomogno     |
| 37 | lalahy    | 89  | tratra       | 141 | mihira        | 193 | malamadamatra |
| 38 | ologno    | 90  | fo           | 142 | misoma        | 194 | malamatra     |
| 39 | zaza      | 91  | aty          | 143 | mitsilay      | 195 | maigny        |
| 40 | vady      | 92  | migiaka      | 144 | mivalagna     | 196 | manjary       |
| 41 | vady      | 93  | mihinagna    | 145 | mivaingagna   | 197 | marikitry     |
| 42 | niny      | 94  | magnekitry   | 146 | mibohaka      | 198 | lavitry       |
| 43 | baba      | 95  | minono       | 147 | masova        | 199 | ankahery      |
| 44 | biby      | 96  | mihika       | 148 | davolagna     | 200 | ankavia       |
| 45 | lako      | 97  | mandoa       | 149 | lakintagna    | 201 | agny          |
| 46 | vorogno   | 98  | mitsitro     | 150 | rano          | 202 | agnatiny      |
| 47 | fandroaka | 99  | miaigny      | 151 | mahalegny     | 203 | miaraka       |
| 48 | ahao      | 100 | mimoehy      | 152 | ranomivalagna | 204 | ndraiky       |
| 49 | bibilava  | 101 | mahita       | 153 | matsabory     | 205 | izikoa        |
| 50 | hankangna | 102 | mitandregny  | 154 | ranomasigny   | 206 | satria        |
| 51 | kakazo    | 103 | mahay        | 155 | sira          | 207 | agnaragna     |
| 52 | atiala    | 104 | mandiniky    | 156 | vato          |     |               |

**41 - Tsimihety (Andapa)**

|    |           |     |               |     |                |     |               |
|----|-----------|-----|---------------|-----|----------------|-----|---------------|
| 1  | zaho      | 53  | kobay         | 105 | mifofogno      | 157 | fasiky        |
| 2  | anao      | 54  | voandraha     | 106 | matahotro      | 158 | vovoko        |
| 3  | izy       | 55  | voany         | 107 | mandry         | 159 | tany          |
| 4  | atsika    | 56  | raviny        | 108 | velogno        | 160 | rondro        |
| 5  | areo      | 57  | vahiny        | 109 | maty           | 161 | zavogno       |
| 6  | zare      | 58  | hodinkakazo   | 110 | mamono         | 162 | lagnitry      |
| 7  | toy       | 59  | folera        | 111 | miady          | 163 | rivotro       |
| 8  | zegny     | 60  | ahitry        | 112 | mihaza         | 164 | lanezy        |
| 9  | eto       | 61  | tady          | 113 | mamboboka      | 165 | vaingandrano  |
| 10 | aroy      | 62  | hoditry       | 114 | mandidy        | 166 | setroko       |
| 11 | azovy     | 63  | hena          | 115 | mamaky         | 167 | afo           |
| 12 | ino       | 64  | lio           | 116 | manomboko kiso | 168 | jofo          |
| 13 | aiza      | 65  | taholagna     | 117 | magnisiky      | 169 | magnoro       |
| 14 | afiriagna | 66  | taviny        | 118 | mangady        | 170 | lalagna       |
| 15 | akory     | 67  | antoly        | 119 | milomagno      | 171 | tanety        |
| 16 | aza       | 68  | tandroko      | 120 | magnembana     | 172 | mena          |
| 17 | jiaby     | 69  | ohy           | 121 | mandeha        | 173 | mahitso       |
| 18 | fontry    | 70  | volomborogno  | 122 | havy           | 174 | mavo          |
| 19 | vitsy     | 71  | volo          | 123 | mandry         | 175 | fotsy         |
| 20 | hely      | 72  | loha          | 124 | mantotry       | 176 | mahintigny    |
| 21 | hafa      | 73  | sofigny       | 125 | mitsangagna    | 177 | haligny       |
| 22 | araiky    | 74  | maso          | 126 | mihodigny      | 178 | andro         |
| 23 | aroa      | 75  | orogno        | 127 | lavo           | 179 | taogno        |
| 24 | telo      | 76  | vava          | 128 | magname        | 180 | mafana        |
| 25 | efatra    | 77  | nify          | 129 | mitagna        | 181 | manintsy      |
| 26 | dimy      | 78  | lela          | 130 | manery         | 182 | feny          |
| 27 | geda      | 79  | angofo        | 131 | mandrokotro    | 183 | vaovao        |
| 28 | lava      | 80  | tongotro      | 132 | manasa         | 184 | hantitry      |
| 29 | malalaka  | 81  | vavitsy       | 133 | mamafa         | 185 | tsara         |
| 30 | matevigny | 82  | lohalitry     | 134 | mitifitry      | 186 | ratsy         |
| 31 | mavesatra | 83  | tagnagna      | 135 | manosiky       | 187 | lo            |
| 32 | hely      | 84  | helatra       | 136 | manipy         | 188 | maloto        |
| 33 | fohy      | 85  | boko          | 137 | mamehy         | 189 | mahitsy       |
| 34 | mahety    | 86  | tsinay        | 138 | manjaitry      | 190 | taboribory    |
| 35 | matify    | 87  | ambozogno     | 139 | magnisa        | 191 | maragnitry    |
| 36 | vaiavy    | 88  | tahezagna     | 140 | mivolagna      | 192 | malomogno     |
| 37 | lalahy    | 89  | tratra        | 141 | mihira         | 193 | malamadamatra |
| 38 | ologno    | 90  | fo            | 142 | misoma         | 194 | legny         |
| 39 | zaza      | 91  | aty           | 143 | mitsingevegna  | 195 | maigny        |
| 40 | vady      | 92  | migiaka       | 144 | mivalagna      | 196 | mety          |
| 41 | vady      | 93  | mihinana      | 145 | mandry         | 197 | mariny        |
| 42 | mama      | 94  | magnekitry    | 146 | mibohoka       | 198 | lavitry       |
| 43 | papa      | 95  | minono        | 147 | masova         | 199 | ankavanagna   |
| 44 | kaka      | 96  | mihaka        | 148 | davolagna      | 200 | ankavia       |
| 45 | laoko     | 97  | mandoa        | 149 | lakintagna     | 201 | agny          |
| 46 | vorogno   | 98  | mitsitro      | 150 | rano           | 202 | agnatiny      |
| 47 | amboa     | 99  | miaigny       | 151 | oragnandro     | 203 | miaraka       |
| 48 | hao       | 100 | mimoehy       | 152 | tegnarano      | 204 | ndreky        |
| 49 | bibilava  | 101 | mahita        | 153 | farihy         | 205 | raha          |
| 50 | hankagna  | 102 | mitandregny   | 154 | ranomasigny    | 206 | satria        |
| 51 | kakazo    | 103 | mahay         | 155 | sira           | 207 | agnaragna     |
| 52 | atiala    | 104 | mieritreritra | 156 | vato           |     |               |

**42 - Nosy Boraha (Ambodifotatra)**

|    |           |     |               |     |                 |     |             |
|----|-----------|-----|---------------|-----|-----------------|-----|-------------|
| 1  | zaho      | 53  | kobay         | 105 | mifofogno       | 157 | fasiky      |
| 2  | ana       | 54  | voankazo      | 106 | matahotro       | 158 | vovoko      |
| 3  | izy       | 55  | vihy          | 107 | mandry          | 159 | tany        |
| 4  | atsika    | 56  | ravigny       | 108 | velogno         | 160 | miha        |
| 5  | anare     | 57  | vahitry       | 109 | maty            | 161 | zavogno     |
| 6  | zare      | 58  | oditry kakazo | 110 | mamono          | 162 | langitry    |
| 7  | ito       | 59  | folaira       | 111 | miady           | 163 | rivotro     |
| 8  | zainy     | 60  | ahitry        | 112 | mitadia         | 164 | ranomandry  |
| 9  | aketo     | 61  | tady          | 113 | mamely          | 165 | laglasy     |
| 10 | aka       | 62  | oditry        | 114 | manapaka        | 166 | setroko     |
| 11 | zovy      | 63  | hena          | 115 | mamaky          | 167 | afo         |
| 12 | ino       | 64  | ra            | 116 | manomboko antsy | 168 | lavenogno   |
| 13 | aiza      | 65  | taholagna     | 117 | mikiky          | 169 | magnoro     |
| 14 | afiriagna | 66  | jabora        | 118 | mangady         | 170 | lalambe     |
| 15 | karakory  | 67  | antody        | 119 | milomagno       | 171 | tanety      |
| 16 | tsy       | 68  | tandroko      | 120 | magnaibagna     | 172 | mena        |
| 17 | ijiaby    | 69  | ohy           | 121 | mandeha         | 173 | maitso      |
| 18 | fontry    | 70  | volomborogno  | 122 | avy             | 174 | mavo        |
| 19 | eliely    | 71  | randragna     | 123 | mandry          | 175 | fotsy       |
| 20 | vitsy     | 72  | loha          | 124 | mantotry        | 176 | maintigny   |
| 21 | afa       | 73  | tadigny       | 125 | mitsangana      | 177 | aligna      |
| 22 | akaiky    | 74  | maso          | 126 | mihodigna       | 178 | andro       |
| 23 | aroa      | 75  | orogno        | 127 | lavo            | 179 | taogno      |
| 24 | telo      | 76  | vava          | 128 | magnamia        | 180 | mafana      |
| 25 | efatra    | 77  | nify          | 129 | mitantagna      | 181 | mangatsiaka |
| 26 | dimy      | 78  | lela          | 130 | tiregna         | 182 | feny        |
| 27 | maventy   | 79  | angofo        | 131 | mikosoko        | 183 | vao         |
| 28 | lava      | 80  | ongotro       | 132 | manasa          | 184 | antitry     |
| 29 | malalaka  | 81  | vavitsy       | 133 | mamafa          | 185 | tsara       |
| 30 | matevigny | 82  | lohalitry     | 134 | mitifitry       | 186 | ratsy       |
| 31 | mavesatra | 83  | tagnana       | 135 | magnatosika     | 187 | lo          |
| 32 | hely      | 84  | ailatra       | 136 | mambalabala     | 188 | maloto      |
| 33 | fohy      | 85  | votraka       | 137 | manohy          | 189 | mahitsy     |
| 34 | mahety    | 86  | tsinay        | 138 | manjetra        | 190 | boribory    |
| 35 | manify    | 87  | tenda         | 139 | magnisa         | 191 | marangitry  |
| 36 | viavy     | 88  | taezagna      | 140 | mivolagna       | 192 | malomo      |
| 37 | lalahy    | 89  | tratra        | 141 | mihira          | 193 | malamatra   |
| 38 | ologno    | 90  | fo            | 142 | midola          | 194 | legny       |
| 39 | zaza      | 91  | aty           | 143 | miempo          | 195 | maigny      |
| 40 | vady      | 92  | midroko       | 144 | mikoriagna      | 196 | manjary     |
| 41 | vady      | 93  | mihinagna     | 145 | mandry          | 197 | mariny      |
| 42 | reny      | 94  | magnekitry    | 146 | mibohaka        | 198 | lavitry     |
| 43 | ray       | 95  | mitsentsitry  | 147 | masova          | 199 | havanagna   |
| 44 | biby      | 96  | mandrora      | 148 | davolagna       | 200 | avia        |
| 45 | loko      | 97  | mandoa        | 149 | kintagna        | 201 | agny        |
| 46 | vorogno   | 98  | misotro       | 150 | rano            | 202 | agnatiny    |
| 47 | kiva      | 99  | miaigny       | 151 | oran andro      | 203 | amin ny     |
| 48 | ho        | 100 | mimoehy       | 152 | renirano        | 204 | ndraiky     |
| 49 | bibilava  | 101 | mahita        | 153 | dobo            | 205 | koa         |
| 50 | ankagna   | 102 | maharegny     | 154 | ranomasigna     | 206 | satria      |
| 51 | kakazo    | 103 | mahay         | 155 | sira            | 207 | agnarana    |
| 52 | atiala    | 104 | mieritreritry | 156 | vato            |     |             |

### 43 - Bara (Beroroha)

|    |            |     |               |     |                |     |            |
|----|------------|-----|---------------|-----|----------------|-----|------------|
| 1  | iaho       | 53  | kobay         | 105 | magnembo       | 157 | fasy       |
| 2  | anao       | 54  | vihikazo      | 106 | matahotsy      | 158 | bo         |
| 3  | i          | 55  | vihy          | 107 | matory         | 159 | tany       |
| 4  | asika      | 56  | raviny        | 108 | velo           | 160 | raho       |
| 5  | anareo     | 57  | vahatsy       | 109 | maty           | 161 | zavo       |
| 6  | reo        | 58  | hodikazo      | 110 | mamono         | 162 | lagnitsy   |
| 7  | toy        | 59  | flera         | 111 | miady          | 163 | rivotsy    |
| 8  | zay        | 60  | akata         | 112 | miremby        | 164 | fanala     |
| 9  | eto        | 61  | hosy          | 113 | mamofoky       | 165 | ranomandry |
| 10 | ao         | 62  | hoditsy       | 114 | manapaky       | 166 | setroky    |
| 11 | ia         | 63  | hena          | 115 | mandidy        | 167 | afo        |
| 12 | ino        | 64  | ra            | 116 | mitomboky mesa | 168 | lavenoky   |
| 13 | aia        | 65  | taola         | 117 | magnihy        | 169 | magnodo    |
| 14 | mbia       | 66  | sabora        | 118 | mihady         | 170 | lala       |
| 15 | hakognaia  | 67  | atody         | 119 | milagno        | 171 | vohitsy    |
| 16 | tsy        | 68  | tsifa         | 120 | mitily         | 172 | mena       |
| 17 | aby        | 69  | ohy           | 121 | mandeha        | 173 | metso      |
| 18 | maro       | 70  | volomboro     | 122 | avy            | 174 | vogny      |
| 19 | sasany     | 71  | vololo        | 123 | matory         | 175 | foty       |
| 20 | kedikedy   | 72  | loha          | 124 | mitoboky       | 176 | mety       |
| 21 | hafa       | 73  | sofy          | 125 | mitsanga       | 177 | hariva     |
| 22 | raiky      | 74  | maso          | 126 | miody          | 178 | andro      |
| 23 | roy        | 75  | oro           | 127 | lavo           | 179 | tao        |
| 24 | telo       | 76  | vava          | 128 | magnome        | 180 | mafana     |
| 25 | efatsy     | 77  | hy            | 129 | mita           | 181 | manitsy    |
| 26 | dimy       | 78  | lela          | 130 | manery         | 182 | feny       |
| 27 | bevata     | 79  | hoho          | 131 | akasoky        | 183 | vao        |
| 28 | lava       | 80  | tomboky       | 132 | manasa         | 184 | atitsy     |
| 29 | malalaky   | 81  | randro        | 133 | mamafa         | 185 | soa        |
| 30 | matevy     | 82  | lohaliky      | 134 | mitifitsy      | 186 | raty       |
| 31 | mavetratsy | 83  | tagna         | 135 | mandrosy       | 187 | lo         |
| 32 | madiniky   | 84  | elatsy        | 136 | manoraky       | 188 | maloto     |
| 33 | boribory   | 85  | troky         | 137 | mamehy         | 189 | mahity     |
| 34 | tery       | 86  | tsinay        | 138 | mitrebiky      | 190 | boribory   |
| 35 | matify     | 87  | vozo          | 139 | magnisaky      | 191 | maragnitsy |
| 36 | apela      | 88  | lambosy       | 140 | magnambara     | 192 | dombo      |
| 37 | anahoada   | 89  | tratra        | 141 | miatsa         | 193 | malama     |
| 38 | olo        | 90  | fo            | 142 | misa           | 194 | le         |
| 39 | zaza       | 91  | aty           | 143 | mihefo         | 195 | maiky      |
| 40 | vady       | 92  | mino          | 144 | mikoria        | 196 | mety       |
| 41 | vady       | 93  | mihina        | 145 | mandry         | 197 | mariny     |
| 42 | reny       | 94  | magnehitsy    | 146 | mibotinaky     | 198 | lavitsy    |
| 43 | ray        | 95  | mitsetsitsy   | 147 | masoandro      | 199 | havana     |
| 44 | biby       | 96  | mandrora      | 148 | vola           | 200 | havia      |
| 45 | fia        | 97  | mandoa        | 149 | vasia          | 201 | agny       |
| 46 | voron      | 98  | mitsoky       | 150 | rano           | 202 | agnaty     |
| 47 | ambo       | 99  | miay          | 151 | ora            | 203 | amin ny    |
| 48 | hao        | 100 | mihehy        | 152 | vavarano       | 204 | sy         |
| 49 | bibilava   | 101 | mahita        | 153 | ranovory       | 205 | laha       |
| 50 | haka       | 102 | mahare        | 154 | ranomasy       | 206 | satria     |
| 51 | hazo       | 103 | mahay         | 155 | sira           | 207 | agnara     |
| 52 | ala        | 104 | mieritseritsy | 156 | vato           |     |            |

**44 - Sakalava (Miandrivazo)**

|    |           |     |               |     |                |     |            |
|----|-----------|-----|---------------|-----|----------------|-----|------------|
| 1  | zaho      | 53  | kobay         | 105 | mahare imbo    | 157 | fasiky     |
| 2  | iha       | 54  | vihinkazo     | 106 | matahotsy      | 158 | botany     |
| 3  | iy        | 55  | vihiny        | 107 | matory         | 159 | tany       |
| 4  | tsika     | 56  | raviny        | 108 | velo           | 160 | raho       |
| 5  | nareo     | 57  | vahatsy       | 109 | maty           | 161 | zavo       |
| 6  | reo       | 58  | holinkazo     | 110 | mamono         | 162 | lagnitry   |
| 7  | ty        | 59  | vonikazo      | 111 | mialy          | 163 | rivotry    |
| 8  | zay       | 60  | bozaky        | 112 | mihaza         | 164 | ranomandry |
| 9  | eto       | 61  | tady          | 113 | mamango        | 165 | gilasy     |
| 10 | ao        | 62  | hoditra       | 114 | manapaky       | 166 | setroky    |
| 11 | ia        | 63  | hena          | 115 | mizara         | 167 | motro      |
| 12 | ino       | 64  | ra            | 116 | mitomboky meso | 168 | lavenoky   |
| 13 | aia       | 65  | taola         | 117 | magnihy        | 169 | magnoro    |
| 14 | ombia     | 66  | taviny        | 118 | mihady         | 170 | lala       |
| 15 | ino zay   | 67  | adody         | 119 | mandagno       | 171 | bongo      |
| 16 | tsy       | 68  | tandroky      | 120 | mitsidina      | 172 | mena       |
| 17 | iaby      | 69  | rambo         | 121 | mandeha        | 173 | maintso    |
| 18 | maro      | 70  | volomboro     | 122 | tonga          | 174 | vogny      |
| 19 | kelikely  | 71  | volo          | 123 | matory         | 175 | fotsy      |
| 20 | kely      | 72  | loha          | 124 | mipetraky      | 176 | mainty     |
| 21 | hafa      | 73  | sofy          | 125 | mitsanga       | 177 | matognaly  |
| 22 | raiky     | 74  | maso          | 126 | mihodiky       | 178 | andro      |
| 23 | roe       | 75  | oro           | 127 | mietota        | 179 | tao        |
| 24 | telo      | 76  | vava          | 128 | magnome        | 180 | mafana     |
| 25 | efatsy    | 77  | nify          | 129 | mifampita      | 181 | manintsy   |
| 26 | dimy      | 78  | lela          | 130 | manandaitsy    | 182 | feny       |
| 27 | bevata    | 79  | hoho          | 131 | magnakasoky    | 183 | vaovao     |
| 28 | lava      | 80  | tomboky       | 132 | manasa         | 184 | antitsy    |
| 29 | malalaky  | 81  | ranjo         | 133 | mamafa         | 185 | soa        |
| 30 | matevy    | 82  | lohaliky      | 134 | mitifitsy      | 186 | raty       |
| 31 | mavesatsy | 83  | tagna         | 135 | manosiky       | 187 | lo         |
| 32 | kely      | 84  | elatra        | 136 | mitoraky       | 188 | maloto     |
| 33 | boribory  | 85  | troky         | 137 | mamatotsy      | 189 | mahity     |
| 34 | tery      | 86  | tsinay        | 138 | manjaitsy      | 190 | boribory   |
| 35 | manify    | 87  | vozo          | 139 | magnisa        | 191 | maragnitsy |
| 36 | ampela    | 88  | lamosy        | 140 | magnambara     | 192 | dombo      |
| 37 | lelahy    | 89  | tratra        | 141 | mihira         | 193 | malama     |
| 38 | olo       | 90  | fo            | 142 | mihisa         | 194 | le         |
| 39 | zaza      | 91  | aty           | 143 | mihefo         | 195 | maiky      |
| 40 | valy      | 92  | misotro       | 144 | maria          | 196 | mety       |
| 41 | valy      | 93  | homana        | 145 | mandry         | 197 | mariny     |
| 42 | neny      | 94  | manaikity     | 146 | boboky         | 198 | lavitsy    |
| 43 | baba      | 95  | mifiky        | 147 | masoandro      | 199 | havana     |
| 44 | biby      | 96  | mandrehoky    | 148 | boara          | 200 | havia      |
| 45 | fia       | 97  | mandoa        | 149 | basia          | 201 | agny       |
| 46 | voron     | 98  | mitsoky       | 150 | rano           | 202 | agnatiny   |
| 47 | alika     | 99  | miay          | 151 | ora            | 203 | amin ny    |
| 48 | hao       | 100 | mihehy        | 152 | vavarano       | 204 | sy         |
| 49 | bibilava  | 101 | mahita        | 153 | ranovory       | 205 | raha       |
| 50 | hanka     | 102 | mijanjanjy    | 154 | riaky          | 206 | satria     |
| 51 | hazo      | 103 | mahay         | 155 | sira           | 207 | agnara     |
| 52 | ala       | 104 | mieritreritsy | 156 | vato           |     |            |

**45 - Vezo (Morondava)**

|    |             |     |            |     |                |     |            |
|----|-------------|-----|------------|-----|----------------|-----|------------|
| 1  | zaho        | 53  | kobay      | 105 | magnimbo       | 157 | vasiky     |
| 2  | iha         | 54  | voakazo    | 106 | matahotry      | 158 | lemboky    |
| 3  | i           | 55  | vihy       | 107 | miroro         | 159 | tany       |
| 4  | tsika       | 56  | ravy       | 108 | velo           | 160 | hiboky     |
| 5  | nareo       | 57  | fototsy    | 109 | maty           | 161 | zavo       |
| 6  | rozy        | 58  | holinkazo  | 110 | mamono         | 162 | lagnitry   |
| 7  | toy         | 59  | folera     | 111 | mialy          | 163 | tsioky     |
| 8  | zany        | 60  | akata      | 112 | mihaza         | 164 | ando       |
| 9  | eto         | 61  | taly       | 113 | mamango        | 165 | gilasy     |
| 10 | atia        | 62  | holiny     | 114 | manapaky       | 166 | setroky    |
| 11 | ia          | 63  | hena       | 115 | mizara         | 167 | motro      |
| 12 | ino         | 64  | lio        | 116 | mitomboky meso | 168 | lavenoky   |
| 13 | aia         | 65  | taola      | 117 | mikiky         | 169 | miketriky  |
| 14 | ombia       | 66  | vonjaky    | 118 | mihaly         | 170 | lala       |
| 15 | akory       | 67  | atoly      | 119 | milagno        | 171 | vohitry    |
| 16 | tsy         | 68  | tsifa      | 120 | mitily         | 172 | mena       |
| 17 | iaby        | 69  | hoy        | 121 | madea          | 173 | maintso    |
| 18 | maro        | 70  | volomboro  | 122 | avy            | 174 | vogny      |
| 19 | tsiampeampe | 71  | vololo     | 123 | miroro         | 175 | foty       |
| 20 | tsiampe     | 72  | loha       | 124 | mitoboky       | 176 | mainty     |
| 21 | hafa        | 73  | sofy       | 125 | mitsanga       | 177 | matognaly  |
| 22 | raiky       | 74  | maso       | 126 | mihodiky       | 178 | atoandro   |
| 23 | roe         | 75  | oro        | 127 | miantonta      | 179 | tao        |
| 24 | telo        | 76  | vava       | 128 | magnome        | 180 | mafana     |
| 25 | efatry      | 77  | hy         | 129 | mitazo         | 181 | manintsy   |
| 26 | dimy        | 78  | lela       | 130 | mitery         | 182 | atriky     |
| 27 | bevata      | 79  | ho         | 131 | mikasoky       | 183 | vao        |
| 28 | lava        | 80  | tomboky    | 132 | manasa         | 184 | antitry    |
| 29 | malalaky    | 81  | ranjo      | 133 | mamafa         | 185 | soa        |
| 30 | matevy      | 82  | ongotry    | 134 | mitifitry      | 186 | raty       |
| 31 | mavesatry   | 83  | tagna      | 135 | manosiky       | 187 | mantsy     |
| 32 | maliniky    | 84  | elatry     | 136 | magnoroky      | 188 | maloto     |
| 33 | bory        | 85  | sarotry    | 137 | mamatotry      | 189 | mahity     |
| 34 | mafitsy     | 86  | tinay      | 138 | mitrebiky      | 190 | boribory   |
| 35 | manify      | 87  | vozo       | 139 | magnisaky      | 191 | maragnitry |
| 36 | ampela      | 88  | lambosy    | 140 | mivola         | 192 | madomo     |
| 37 | johary      | 89  | tratra     | 141 | mihira         | 193 | madoso     |
| 38 | olo         | 90  | fo         | 142 | mihisa         | 194 | legna      |
| 39 | aja         | 91  | aty        | 143 | mihafy         | 195 | maiky      |
| 40 | valy        | 92  | mihino     | 144 | mikorisa       | 196 | mety       |
| 41 | valy        | 93  | mihina     | 145 | mandrike       | 197 | mariny     |
| 42 | neny        | 94  | magnehitry | 146 | mivonto        | 198 | lavitry    |
| 43 | baba        | 95  | mitsitsiky | 147 | masoandro      | 199 | havana     |
| 44 | mbiby       | 96  | mandreoky  | 148 | vola           | 200 | havia      |
| 45 | fia         | 97  | mandoa     | 149 | basia          | 201 | agny       |
| 46 | voron       | 98  | mitsoky    | 150 | rano           | 202 | agnaty     |
| 47 | alika       | 99  | miay       | 151 | ora            | 203 | aminy      |
| 48 | hao         | 100 | mihehy     | 152 | vavarano       | 204 | sy         |
| 49 | bibilava    | 101 | mahita     | 153 | ranovory       | 205 | raha       |
| 50 | soko        | 102 | mijanjanjy | 154 | ranomasy       | 206 | satria     |
| 51 | hazo        | 103 | mahay      | 155 | sira           | 207 | agnara     |
| 52 | ala         | 104 | mandiniky  | 156 | vato           |     |            |

**46 - Bara (Ihosy)**

|    |          |     |             |     |                |     |            |
|----|----------|-----|-------------|-----|----------------|-----|------------|
| 1  | iaho     | 53  | kobay       | 105 | magnemboky     | 157 | fasiky     |
| 2  | hanao    | 54  | voakazo     | 106 | matatahosy     | 158 | bo         |
| 3  | i        | 55  | vihy        | 107 | mandry         | 159 | tany       |
| 4  | sika     | 56  | ravy        | 108 | velo           | 160 | raho       |
| 5  | nareo    | 57  | faka        | 109 | maty           | 161 | zavo       |
| 6  | andreo   | 58  | hoditrazo   | 110 | mamono         | 162 | lanisy     |
| 7  | toy      | 59  | vonkazo     | 111 | miady          | 163 | rivosy     |
| 8  | zay      | 60  | akata       | 112 | mamita         | 164 | ranomandry |
| 9  | etoa     | 61  | hosho       | 113 | mamofoky       | 165 | glasy      |
| 10 | ato      | 62  | hoditsy     | 114 | manapaky       | 166 | setroky    |
| 11 | ia       | 63  | hena        | 115 | manilaky       | 167 | afo        |
| 12 | ino      | 64  | lio         | 116 | mitomboky mesa | 168 | lavenoky   |
| 13 | aia      | 65  | taola       | 117 | mikihy         | 169 | magnoro    |
| 14 | ombia    | 66  | sabora      | 118 | mihady         | 170 | lala       |
| 15 | akory    | 67  | atody       | 119 | milagno        | 171 | vohisy     |
| 16 | tsy      | 68  | sifa        | 120 | misidy         | 172 | mena       |
| 17 | aby      | 69  | ohony       | 121 | mandeha        | 173 | meso       |
| 18 | maro     | 70  | volomboro   | 122 | avy            | 174 | vony       |
| 19 | kidikidy | 71  | volo        | 123 | mandry         | 175 | fosy       |
| 20 | kidy     | 72  | loha        | 124 | mitoboky       | 176 | minty      |
| 21 | hafa     | 73  | sofy        | 125 | mitsanga       | 177 | aly        |
| 22 | raiky    | 74  | maso        | 126 | mihotaky       | 178 | andro      |
| 23 | roy      | 75  | oro         | 127 | megebo         | 179 | tao        |
| 24 | telo     | 76  | vava        | 128 | manolosy       | 180 | mafana     |
| 25 | efatry   | 77  | nihy        | 129 | mitata         | 181 | manisy     |
| 26 | dimy     | 78  | lela        | 130 | mitery         | 182 | feny       |
| 27 | foloay   | 79  | hoho        | 131 | manatasoky     | 183 | vao        |
| 28 | abo      | 80  | tomboky     | 132 | manasa         | 184 | antisy     |
| 29 | malalaky | 81  | ranjo       | 133 | mamafa         | 185 | soa        |
| 30 | matevy   | 82  | pokopoky    | 134 | mitifosy       | 186 | raty       |
| 31 | mazefasy | 83  | tana        | 135 | manosiky       | 187 | lo         |
| 32 | madiniky | 84  | elasy       | 136 | manoraky       | 188 | motaky     |
| 33 | pohy     | 85  | troky       | 137 | mamehy         | 189 | mahisy     |
| 34 | pisa     | 86  | tinay       | 138 | mitreboky      | 190 | bory       |
| 35 | fisaky   | 87  | vozo        | 139 | manisa         | 191 | maragnisy  |
| 36 | ampela   | 88  | lambosy     | 140 | miroho         | 192 | dombo      |
| 37 | rangahy  | 89  | tratra      | 141 | miatsa         | 193 | malama     |
| 38 | olo      | 90  | fo          | 142 | mihisa         | 194 | le         |
| 39 | zaza     | 91  | aty         | 143 | mihefo         | 195 | maiky      |
| 40 | vady     | 92  | mino        | 144 | mikoria        | 196 | mety       |
| 41 | vady     | 93  | mihina      | 145 | mandry         | 197 | mariny     |
| 42 | endry    | 94  | magnehisy   | 146 | mibosina       | 198 | lavisy     |
| 43 | aba      | 95  | mitsetsiky  | 147 | masoandro      | 199 | havagna    |
| 44 | biby     | 96  | mandrehoky  | 148 | vola           | 200 | havia      |
| 45 | fia      | 97  | mandoha     | 149 | kinta          | 201 | agny       |
| 46 | voron    | 98  | mifioky     | 150 | rano           | 202 | agnaty     |
| 47 | ambo     | 99  | miay        | 151 | ora            | 203 | miray      |
| 48 | hao      | 100 | mihehy      | 152 | vavarano       | 204 | sy         |
| 49 | bibilava | 101 | magnety     | 153 | atara          | 205 | laha       |
| 50 | haka     | 102 | mijy        | 154 | ranomasy       | 206 | satria     |
| 51 | hazo     | 103 | hay         | 155 | sira           | 207 | agnara     |
| 52 | ala      | 104 | mieriserisy | 156 | vato           |     |            |



**47 - Tsimihety (Antsohihy)**

|    |            |     |                |     |               |     |                |
|----|------------|-----|----------------|-----|---------------|-----|----------------|
| 1  | zaho       | 53  | koboay         | 105 | matandregny   | 157 | fasika         |
| 2  | ana        | 54  | voankazo       | 106 | matahotro     | 158 | jofo           |
| 3  | izy        | 55  | voaniny        | 107 | mandry        | 159 | tany           |
| 4  | antsika    | 56  | ravigny        | 108 | velogno       | 160 | rondro         |
| 5  | are        | 57  | fakany         | 109 | maty          | 161 | zavogno        |
| 6  | zare       | 58  | hodinkazo      | 110 | mamono        | 162 | langitry       |
| 7  | to         | 59  | folera         | 111 | miady         | 163 | rovitro        |
| 8  | zany       | 60  | ahitry         | 112 | mijoko        | 164 | ranomivaingana |
| 9  | aketo      | 61  | tady           | 113 | mamiko        | 165 | ranomivaingana |
| 10 | aka        | 62  | hoditry kakazo | 114 | manapaka      | 166 | setroko        |
| 11 | zovy       | 63  | hena           | 115 | mamaky        | 167 | motro          |
| 12 | ino        | 64  | lio            | 116 | magnatroboky  | 168 | jofo           |
| 13 | akeza      | 65  | taholagna      | 117 | mikiky        | 169 | mandoro        |
| 14 | aforiagna  | 66  | jaborany       | 118 | mangady       | 170 | lalagna        |
| 15 | magnankory | 67  | antody         | 119 | milomoagno    | 171 | tendrombohitry |
| 16 | tsy        | 68  | tandroko       | 120 | magnembagna   | 172 | mena           |
| 17 | jiaby      | 69  | rambo          | 121 | mandeha       | 173 | mahintso       |
| 18 | fontry     | 70  | volomborogno   | 122 | navy          | 174 | fondragna      |
| 19 | vitsy      | 71  | vololo         | 123 | mandry        | 175 | fotsy          |
| 20 | hely       | 72  | loha           | 124 | mantontry     | 176 | mahitigny      |
| 21 | hafa       | 73  | sofigny        | 125 | mitsangana    | 177 | haligny        |
| 22 | araiky     | 74  | maso           | 126 | mihodigny     | 178 | mazava         |
| 23 | roa        | 75  | orogno         | 127 | lavo          | 179 | taogno         |
| 24 | telo       | 76  | vava           | 128 | magname       | 180 | mahevoko       |
| 25 | efatra     | 77  | nify           | 129 | mitantagna    | 181 | manintsy       |
| 26 | dimy       | 78  | lela           | 130 | mitery        | 182 | feny           |
| 27 | geda       | 79  | angofo         | 131 | mikosoko      | 183 | vovo           |
| 28 | lava       | 80  | tongotro       | 132 | manasa        | 184 | hantitry       |
| 29 | malalaka   | 81  | bokombavitsy   | 133 | mamafa        | 185 | tsara          |
| 30 | matevigny  | 82  | lohalitry      | 134 | mitifitry     | 186 | ratsy          |
| 31 | mavesatry  | 83  | tanagna        | 135 | manosiky      | 187 | lo             |
| 32 | hely       | 84  | elatra         | 136 | manopy        | 188 | maloto         |
| 33 | fohy       | 85  | kibo           | 137 | mamatotro     | 189 | mahitsy        |
| 34 | mahety     | 86  | tsinay         | 138 | manjaitry     | 190 | boribory       |
| 35 | matify     | 87  | vozogno        | 139 | magnisa       | 191 | marangitry     |
| 36 | vaiavy     | 88  | lamosigny      | 140 | mikoragna     | 192 | dombo          |
| 37 | lalahy     | 89  | tratra         | 141 | mihira        | 193 | mahitsy        |
| 38 | ologno     | 90  | fo             | 142 | misoma        | 194 | malamatra      |
| 39 | zaza       | 91  | aty            | 143 | mitsingevagna | 195 | maigny         |
| 40 | vady       | 92  | migiaka        | 144 | mikoriagna    | 196 | manjary        |
| 41 | vady       | 93  | mihinagna      | 145 | mivaingagna   | 197 | marikitry      |
| 42 | niny       | 94  | magnekitry     | 146 | mibotsigny    | 198 | lavitry        |
| 43 | baba       | 95  | minono         | 147 | masova        | 199 | ankavanagna    |
| 44 | biby       | 96  | mandrehoko     | 148 | volagna       | 200 | ankavia        |
| 45 | lako       | 97  | mandoa         | 149 | lakintagna    | 201 | agny           |
| 46 | vorogno    | 98  | mitsotra       | 150 | rano          | 202 | agnatiny       |
| 47 | fandroaka  | 99  | miaigny        | 151 | oragna        | 203 | amin ny        |
| 48 | ahao       | 100 | mimoehy        | 152 | renindrano    | 204 | ndreky         |
| 49 | bibilava   | 101 | mahita         | 153 | mantsabory    | 205 | iziko          |
| 50 | hankagna   | 102 | mitandregny    | 154 | ranomasigny   | 206 | satria         |
| 51 | kakazo     | 103 | mahay          | 155 | sira          | 207 | agnaragna      |
| 52 | hatiala    | 104 | mandiniky      | 156 | vato          |     |                |

**48 - Merina (Maevatanana)**

|    |           |     |               |     |              |     |                |
|----|-----------|-----|---------------|-----|--------------|-----|----------------|
| 1  | zaho      | 53  | kibay         | 105 | mifofona     | 157 | fasika         |
| 2  | anao      | 54  | voankazo      | 106 | manahy       | 158 | vovoka         |
| 3  | izy       | 55  | voa           | 107 | matory       | 159 | tany           |
| 4  | atsika    | 56  | ravina        | 108 | mivelona     | 160 | rahona         |
| 5  | ianareo   | 57  | faka          | 109 | maty         | 161 | zavona         |
| 6  | izireo    | 58  | hodikazo      | 110 | mamono       | 162 | lanitra        |
| 7  | ity       | 59  | felana        | 111 | miady        | 163 | rivotra        |
| 8  | izany     | 60  | ahitra        | 112 | mihaza       | 164 | ranomandry     |
| 9  | eto       | 61  | tady          | 113 | mikapoka     | 165 | vongandrano    |
| 10 | ery       | 62  | hoditra       | 114 | manapaka     | 166 | setroka        |
| 11 | iza       | 63  | hena          | 115 | mamaky       | 167 | afo            |
| 12 | ino       | 64  | lio           | 116 | manindrana   | 168 | lavenona       |
| 13 | aiza      | 65  | taolana       | 117 | mikiky       | 169 | mandoro        |
| 14 | ovina     | 66  | tavina        | 118 | mandavaka    | 170 | lalana         |
| 15 | ahoana    | 67  | atody         | 119 | milomano     | 171 | tendrombohitra |
| 16 | aza       | 68  | tandroka      | 120 | manidina     | 172 | mena           |
| 17 | jiaby     | 69  | rambo         | 121 | mandeha      | 173 | maitso         |
| 18 | maro      | 70  | volomborona   | 122 | avy          | 174 | mavo           |
| 19 | vitsy     | 71  | vololo        | 123 | mandry       | 175 | fotsy          |
| 20 | kely      | 72  | loha          | 124 | mipetraka    | 176 | mainty         |
| 21 | hafa      | 73  | sofina        | 125 | mitsangana   | 177 | alina          |
| 22 | ray       | 74  | maso          | 126 | mihodina     | 178 | mantsana       |
| 23 | roa       | 75  | orona         | 127 | mianjera     | 179 | taona          |
| 24 | telo      | 76  | vava          | 128 | manome       | 180 | mafana         |
| 25 | efatra    | 77  | nify          | 129 | mitazona     | 181 | manintsy       |
| 26 | dimy      | 78  | lela          | 130 | mipotsitra   | 182 | feny           |
| 27 | ngeza     | 79  | hoho          | 131 | manakasoka   | 183 | vaovao         |
| 28 | lava      | 80  | tongotra      | 132 | manasa       | 184 | matoy          |
| 29 | malalaka  | 81  | ranjo         | 133 | mamafa       | 185 | tsara          |
| 30 | matevina  | 82  | lohalika      | 134 | mitifitra    | 186 | ratsy          |
| 31 | mazefatra | 83  | tanana        | 135 | manosika     | 187 | lo             |
| 32 | kely      | 84  | elatra        | 136 | mitoraka     | 188 | maloto         |
| 33 | fohy      | 85  | kibo          | 137 | mamatotra    | 189 | mahitsy        |
| 34 | tery      | 86  | tsinay        | 138 | manjaitra    | 190 | boribory       |
| 35 | manify    | 87  | vozona        | 139 | manisa       | 191 | maranitra      |
| 36 | vehivavy  | 88  | lamosina      | 140 | miteny       | 192 | dombo          |
| 37 | lehilahy  | 89  | tratra        | 141 | mihira       | 193 | malama         |
| 38 | olona     | 90  | fo            | 142 | milalao      | 194 | mando          |
| 39 | zaza      | 91  | aty           | 143 | mitsinkafona | 195 | maina          |
| 40 | vady      | 92  | misotro       | 144 | mikoriana    | 196 | mety           |
| 41 | vady      | 93  | mihinana      | 145 | mandry       | 197 | akaiky         |
| 42 | neny      | 94  | manaikitra    | 146 | mibontsina   | 198 | lavitra        |
| 43 | dada      | 95  | minono        | 147 | masoandro    | 199 | havanana       |
| 44 | biby      | 96  | mandrehoka    | 148 | volana       | 200 | havia          |
| 45 | fia       | 97  | mandoha       | 149 | kintana      | 201 | any            |
| 46 | vorona    | 98  | mitsoka       | 150 | rano         | 202 | anaty          |
| 47 | alika     | 99  | miaina        | 151 | orana        | 203 | miaraka        |
| 48 | hao       | 100 | mihomehy      | 152 | renirano     | 204 | ary            |
| 49 | bibilava  | 101 | mijery        | 153 | mantsabory   | 205 | raha           |
| 50 | kankana   | 102 | mihaino       | 154 | ranomasina   | 206 | satria         |
| 51 | hazo      | 103 | mahay         | 155 | sira         | 207 | anarana        |
| 52 | ala       | 104 | mieritreritra | 156 | vato         |     |                |

**49 - Sakalava (Besalampy)**

|    |           |     |               |     |            |     |            |
|----|-----------|-----|---------------|-----|------------|-----|------------|
| 1  | zao       | 53  | kobay         | 105 | magnimbo   | 157 | fasiky     |
| 2  | iha       | 54  | vihinkazo     | 106 | misalasala | 158 | bo         |
| 3  | i         | 55  | vihy          | 107 | mandry     | 159 | tany       |
| 4  | tsika     | 56  | ravy          | 108 | mivelo     | 160 | raho       |
| 5  | nareo     | 57  | vaha          | 109 | maty       | 161 | zavo       |
| 6  | reo       | 58  | holikazo      | 110 | mamono     | 162 | lagnitry   |
| 7  | ty        | 59  | flera         | 111 | mialy      | 163 | tsioky     |
| 8  | zay       | 60  | akata         | 112 | miaza      | 164 | lanezy     |
| 9  | eto       | 61  | taly          | 113 | mamango    | 165 | glasy      |
| 10 | ery       | 62  | hoditry       | 114 | manapaky   | 166 | setroky    |
| 11 | ia        | 63  | hena          | 115 | mamaky     | 167 | motro      |
| 12 | ino       | 64  | lio           | 116 | mitroboky  | 168 | laveno     |
| 13 | aia       | 65  | tola          | 117 | mikiky     | 169 | mandoro    |
| 14 | ombia     | 66  | jabora        | 118 | mandavaky  | 170 | lala       |
| 15 | manakory  | 67  | atoly         | 119 | milomagno  | 171 | vohitry    |
| 16 | ka        | 68  | tandroky      | 120 | mitily     | 172 | mena       |
| 17 | iaby      | 69  | rambo         | 121 | mandeha    | 173 | maitso     |
| 18 | maro      | 70  | volomboro     | 122 | avy        | 174 | mavo       |
| 19 | kely      | 71  | vololo        | 123 | matoritory | 175 | foty       |
| 20 | kely      | 72  | loha          | 124 | mipetraky  | 176 | mainty     |
| 21 | hafa      | 73  | sofy          | 125 | mitsanga   | 177 | erignaly   |
| 22 | raiky     | 74  | maso          | 126 | mihodiky   | 178 | antoandro  |
| 23 | roy       | 75  | oro           | 127 | lavo       | 179 | tao        |
| 24 | telo      | 76  | vava          | 128 | magnome    | 180 | mafana     |
| 25 | efatry    | 77  | nify          | 129 | mita       | 181 | manintsy   |
| 26 | dimy      | 78  | lela          | 130 | mipotsiky  | 182 | feny       |
| 27 | maventy   | 79  | ho            | 131 | magnasoky  | 183 | vao        |
| 28 | lava      | 80  | tomboky       | 132 | manasa     | 184 | matoy      |
| 29 | malalaky  | 81  | ranjo         | 133 | mamafa     | 185 | tsara      |
| 30 | matevy    | 82  | lohaliky      | 134 | mitifitry  | 186 | raty       |
| 31 | mavesatry | 83  | tagna         | 135 | manosiky   | 187 | lo         |
| 32 | kely      | 84  | elatry        | 136 | mitoraky   | 188 | maloto     |
| 33 | fohy      | 85  | kibo          | 137 | mamehy     | 189 | mahity     |
| 34 | tsihomby  | 86  | tinay         | 138 | manjaitry  | 190 | boribory   |
| 35 | matify    | 87  | vozo          | 139 | magnisaky  | 191 | maragnitry |
| 36 | ampela    | 88  | lamosy        | 140 | misafa     | 192 | madomo     |
| 37 | lelahy    | 89  | tratra        | 141 | mihira     | 193 | malamalama |
| 38 | olo       | 90  | fo            | 142 | mihisa     | 194 | pitsaky    |
| 39 | zaza      | 91  | aty           | 143 | miefo      | 195 | maiky      |
| 40 | vady      | 92  | mino          | 144 | mitobaky   | 196 | omby       |
| 41 | vady      | 93  | mihina        | 145 | mandry     | 197 | mariny     |
| 42 | neny      | 94  | magnetry      | 146 | mibontso   | 198 | lavitry    |
| 43 | baba      | 95  | minono        | 147 | masoandro  | 199 | ankavana   |
| 44 | biby      | 96  | mandreoky     | 148 | boara      | 200 | ankavia    |
| 45 | fia       | 97  | mandoa        | 149 | kinta      | 201 | agny       |
| 46 | voron     | 98  | mitsoky       | 150 | rano       | 202 | agnaty     |
| 47 | ambo      | 99  | miaigna       | 151 | ora        | 203 | miaraky    |
| 48 | hao       | 100 | mihehy        | 152 | vavarano   | 204 | ndraiky    |
| 49 | bibilava  | 101 | mikasa        | 153 | dobo       | 205 | lafa       |
| 50 | hanka     | 102 | mijanjanjy    | 154 | ranosira   | 206 | satria     |
| 51 | hazo      | 103 | mahay         | 155 | sira       | 207 | agnara     |
| 52 | ala       | 104 | mieritreritry | 156 | vato       |     |            |

**50 - Betsimisaraka (Tanambao Manampotsy)**

|    |           |     |               |     |                |     |                |
|----|-----------|-----|---------------|-----|----------------|-----|----------------|
| 1  | zaho      | 53  | fioka         | 105 | mifofogna      | 157 | fasina         |
| 2  | ano       | 54  | vonkazo       | 106 | vaka           | 158 | vovoka         |
| 3  | izy       | 55  | vihiny        | 107 | mandry         | 159 | tany           |
| 4  | antsena   | 56  | ravina        | 108 | velona         | 160 | raona          |
| 5  | andreo    | 57  | vahany        | 109 | maty           | 161 | zavona         |
| 6  | zareo     | 58  | oditra kakazo | 110 | mamono         | 162 | lagnitra       |
| 7  | ity       | 59  | folera        | 111 | miady          | 163 | rivotra        |
| 8  | zany      | 60  | ahitra        | 112 | mitadia        | 164 | ranomandry     |
| 9  | akito     | 61  | afotra        | 113 | mamango        | 165 | ranomandry     |
| 10 | ako       | 62  | hoditra       | 114 | manapaka       | 166 | toisina        |
| 11 | zovy      | 63  | ena           | 115 | mizara         | 167 | afo            |
| 12 | ino       | 64  | ra            | 116 | manombok ansy  | 168 | lavinina       |
| 13 | akeza     | 65  | tolagna       | 117 | mikiky         | 169 | magnoro        |
| 14 | oviana    | 66  | taviny        | 118 | mangady        | 170 | araby          |
| 15 | ino       | 67  | atody         | 119 | mandagno       | 171 | tavirana       |
| 16 | sy        | 68  | tandroka      | 120 | mirigna        | 172 | mena           |
| 17 | jiaby     | 69  | volombody     | 121 | mandiaa        | 173 | miso           |
| 18 | be        | 70  | volomborogna  | 122 | tonga          | 174 | mavo           |
| 19 | visivisy  | 71  | randrana      | 123 | mandry         | 175 | fosy           |
| 20 | bitika    | 72  | loa           | 124 | mikomaka       | 176 | mintina        |
| 21 | hafa      | 73  | tadigny       | 125 | mideragna      | 177 | alina          |
| 22 | reka      | 74  | maso          | 126 | miodigna       | 178 | andro          |
| 23 | roy       | 75  | orogna        | 127 | lavo           | 179 | taona          |
| 24 | telo      | 76  | vava          | 128 | magnomia       | 180 | mafana         |
| 25 | efatra    | 77  | nify          | 129 | mitondra       | 181 | mangasiaka     |
| 26 | dimy      | 78  | lela          | 130 | mamia          | 182 | feno           |
| 27 | lebe      | 79  | angofo        | 131 | mampikasoka    | 183 | vovo           |
| 28 | lava      | 80  | tongotra      | 132 | manasa         | 184 | antitra        |
| 29 | malalaka  | 81  | ladirana      | 133 | mamafa         | 185 | sara           |
| 30 | mativina  | 82  | loalitra      | 134 | mitifitra      | 186 | rasy           |
| 31 | mavesatra | 83  | tagnana       | 135 | manosika       | 187 | lo             |
| 32 | bitika    | 84  | elatra        | 136 | mambalavala    | 188 | maloto         |
| 33 | foika     | 85  | kibo          | 137 | mamatotra      | 189 | mahisy         |
| 34 | tery      | 86  | olika         | 138 | manzitra       | 190 | boribory       |
| 35 | manify    | 87  | atoka         | 139 | mangnisa       | 191 | marangitra     |
| 36 | viavy     | 88  | tambokoka     | 140 | mizaka         | 192 | malombona      |
| 37 | lilahy    | 89  | tratra        | 141 | miira          | 193 | malady         |
| 38 | olona     | 90  | fo            | 142 | milalo         | 194 | mando          |
| 39 | zaza      | 91  | aty           | 143 | miboagna       | 195 | megna          |
| 40 | vady      | 92  | miinana       | 144 | midoroka       | 196 | mety           |
| 41 | vady      | 93  | miinana       | 145 | mivengana      | 197 | amarivo        |
| 42 | mama      | 94  | magnifatra    | 146 | mamoky rivotra | 198 | lavitra        |
| 43 | papa      | 95  | misisitra     | 147 | masoandro      | 199 | avanana        |
| 44 | biby      | 96  | mandreoka     | 148 | volana         | 200 | avia           |
| 45 | loka      | 97  | mandoa        | 149 | kintana        | 201 | agny           |
| 46 | vorogna   | 98  | misotra       | 150 | rano           | 202 | agnatiny       |
| 47 | kiva      | 99  | miegna        | 151 | orana          | 203 | miarak amin ny |
| 48 | o         | 100 | mimehy        | 152 | tegnarano      | 204 | sy             |
| 49 | bibilava  | 101 | magnitigna    | 153 | farihy         | 205 | raha           |
| 50 | ankagna   | 102 | mitino        | 154 | ranomasina     | 206 | satria         |
| 51 | kakazo    | 103 | mae           | 155 | sira           | 207 | agnarana       |
| 52 | atiala    | 104 | mieritreritra | 156 | vato           |     |                |

**51 - Sihanaka (Morarano Chrome)**

|    |           |     |                |     |                 |     |                |
|----|-----------|-----|----------------|-----|-----------------|-----|----------------|
| 1  | za        | 53  | firtsoka       | 105 | mifofona        | 157 | fasika         |
| 2  | ena       | 54  | vonkazo        | 106 | matahotra       | 158 | jofo           |
| 3  | izy       | 55  | vony           | 107 | matory          | 159 | tany           |
| 4  | tsikana   | 56  | ravina         | 108 | vielona         | 160 | rahona         |
| 5  | nareo     | 57  | faka           | 109 | maty            | 161 | zavona         |
| 6  | ry zareo  | 58  | hodikazo       | 110 | mamono          | 162 | lanitra        |
| 7  | ty        | 59  | voninkiazo     | 111 | miady           | 163 | rivotra        |
| 8  | zany      | 60  | ahatra         | 112 | mihaza          | 164 | ranomandry     |
| 9  | eto       | 61  | tady           | 113 | mandaroka       | 165 | ranomandry     |
| 10 | ao        | 62  | hoditra        | 114 | manapaka        | 166 | setroka        |
| 11 | iza       | 63  | hena           | 115 | mamaky          | 167 | afo            |
| 12 | inona     | 64  | ra             | 116 | manomboka antsy | 168 | lavenina       |
| 13 | aiza      | 65  | tolana         | 117 | mikiky          | 169 | mandoro        |
| 14 | ovina     | 66  | matavy         | 118 | mitombana       | 170 | lalana         |
| 15 | ahona     | 67  | atody          | 119 | milomano        | 171 | tendrombohitra |
| 16 | tsy       | 68  | tandroka       | 120 | manembana       | 172 | mena           |
| 17 | daholo    | 69  | rambo          | 121 | mande           | 173 | maitso         |
| 18 | bietsaka  | 70  | volomborona    | 122 | avy             | 174 | mavo           |
| 19 | vitsy     | 71  | volo           | 123 | matory          | 175 | fotsy          |
| 20 | bitika    | 72  | loha           | 124 | mipetraka       | 176 | mainty         |
| 21 | hafa      | 73  | sofina         | 125 | mijaridina      | 177 | alina          |
| 22 | ray       | 74  | maso           | 126 | miodina         | 178 | andro          |
| 23 | roa       | 75  | orona          | 127 | lavo            | 179 | tona           |
| 24 | telo      | 76  | vava           | 128 | manome          | 180 | mafana         |
| 25 | iefatra   | 77  | nify           | 129 | mitantana       | 181 | mangatsieka    |
| 26 | dimy      | 78  | lela           | 130 | manery          | 182 | fieno          |
| 27 | ngeda     | 79  | angofo         | 131 | manakasoka      | 183 | vaovao         |
| 28 | lava      | 80  | tongotra       | 132 | manasa          | 184 | antitra        |
| 29 | malalaka  | 81  | ranjo          | 133 | mamafa          | 185 | tsara          |
| 30 | matevina  | 82  | lohalika       | 134 | mitifitra       | 186 | ratsy          |
| 31 | mavesatra | 83  | tanana         | 135 | manosika        | 187 | lo             |
| 32 | kitika    | 84  | ielatra        | 136 | manary          | 188 | maloto         |
| 33 | fohy      | 85  | ventre         | 137 | mamatotra       | 189 | mahitsy        |
| 34 | tery      | 86  | tsinay         | 138 | manjaitra       | 190 | boribory       |
| 35 | manify    | 87  | atoka          | 139 | manisa          | 191 | matsiko        |
| 36 | vaiavy    | 88  | lamosina       | 140 | miteny          | 192 | dombo          |
| 37 | lela      | 89  | tratra         | 141 | mihira          | 193 | malama         |
| 38 | olona     | 90  | fo             | 142 | milalao         | 194 | mando          |
| 39 | zaza      | 91  | aty            | 143 | mitsingievana   | 195 | maina          |
| 40 | vady      | 92  | misotro        | 144 | mikoriana       | 196 | miety          |
| 41 | vady      | 93  | minana         | 145 | mivaingana      | 197 | akaiky         |
| 42 | mama      | 94  | manaikitra     | 146 | mibontsina      | 198 | lavitra        |
| 43 | dada      | 95  | mitsetsitra    | 147 | masoandro       | 199 | ankavanana     |
| 44 | biby      | 96  | mandriehoaka   | 148 | volana          | 200 | ankavia        |
| 45 | trondro   | 97  | mandoa         | 149 | kintana         | 201 | any            |
| 46 | vorona    | 98  | mitsoka        | 150 | rano            | 202 | anaty          |
| 47 | amboa     | 99  | miaina         | 151 | orana           | 203 | miaraka        |
| 48 | hao       | 100 | mimehy         | 152 | renirano        | 204 | sy             |
| 49 | bibilava  | 101 | mahita         | 153 | farihy          | 205 | raha           |
| 50 | felika    | 102 | mihaino        | 154 | ranomasina      | 206 | satry          |
| 51 | kakazo    | 103 | mahay          | 155 | sira            | 207 | anarana        |
| 52 | atiala    | 104 | mieritrieritra | 156 | vato            |     |                |

**52 - Betsileo (Ambohimahaso)**

|    |            |     |               |     |                |     |                |
|----|------------|-----|---------------|-----|----------------|-----|----------------|
| 1  | aho        | 53  | kobay         | 105 | mamofona       | 157 | fasika         |
| 2  | agnao      | 54  | voakazo       | 106 | matahotsa      | 158 | vovoka         |
| 3  | iy         | 55  | voany         | 107 | matory         | 159 | tany           |
| 4  | antsika    | 56  | ravina        | 108 | velogna        | 160 | rahogna        |
| 5  | agnareo    | 57  | fakany        | 109 | maty           | 161 | zavona         |
| 6  | zareo      | 58  | hodikazo      | 110 | mamono         | 162 | lagnitsa       |
| 7  | ito        | 59  | voninkiazo    | 111 | miady          | 163 | rivotsa        |
| 8  | izay       | 60  | bozaka        | 112 | miremby        | 164 | ranomandry     |
| 9  | eto        | 61  | tady          | 113 | manjera        | 165 | ranomandry     |
| 10 | ao         | 62  | hoditsa       | 114 | manapaka       | 166 | setroka        |
| 11 | ia         | 63  | hena          | 115 | mamaky         | 167 | afo            |
| 12 | ina        | 64  | ra            | 116 | manomboka mesa | 168 | lavenina       |
| 13 | aia        | 65  | taolagna      | 117 | mikiky         | 169 | magnoro        |
| 14 | viana      | 66  | vondraka      | 118 | mihady         | 170 | lalagna        |
| 15 | manahoana  | 67  | atody         | 119 | mandagno       | 171 | tendrombohitsa |
| 16 | tsa        | 68  | tandroka      | 120 | manidigna      | 172 | mena           |
| 17 | aby        | 69  | rambo         | 121 | mandeha        | 173 | maitso         |
| 18 | betsaka    | 70  | volomborogna  | 122 | avy            | 174 | mavo           |
| 19 | vitsy      | 71  | volo          | 123 | matory         | 175 | fotsy          |
| 20 | kely       | 72  | loha          | 124 | mitoetsa       | 176 | mainty         |
| 21 | hafa       | 73  | sofigna       | 125 | mitsangana     | 177 | aligna         |
| 22 | raika      | 74  | maso          | 126 | mihodigna      | 178 | andro          |
| 23 | roa        | 75  | orogna        | 127 | lavo           | 179 | taogna         |
| 24 | telo       | 76  | vava          | 128 | manome         | 180 | mafana         |
| 25 | efatsa     | 77  | nify          | 129 | mitantana      | 181 | mmanara        |
| 26 | dimy       | 78  | lela          | 130 | manery         | 182 | feny           |
| 27 | libe       | 79  | hoho          | 131 | magnasoka      | 183 | vaovao         |
| 28 | lava       | 80  | tongotsa      | 132 | manasa         | 184 | antitsa        |
| 29 | malalaka   | 81  | voavitsy      | 133 | mamafa         | 185 | soa            |
| 30 | matevina   | 82  | lohalika      | 134 | mitifitsa      | 186 | ratsy          |
| 31 | mavetsatsa | 83  | tagnana       | 135 | manosika       | 187 | lo             |
| 32 | kitika     | 84  | elatsa        | 136 | magnary        | 188 | maloto         |
| 33 | fohy       | 85  | troka         | 137 | mandrohy       | 189 | mahitsy        |
| 34 | tery       | 86  | tsinay        | 138 | manjaitsa      | 190 | boribory       |
| 35 | manify     | 87  | vozogna       | 139 | magnisa        | 191 | maragnitsa     |
| 36 | ampela     | 88  | voho          | 140 | mitarogna      | 192 | bodo           |
| 37 | lela       | 89  | tratra        | 141 | mihira         | 193 | malama         |
| 38 | ona        | 90  | fo            | 142 | milaolao       | 194 | mando          |
| 39 | zaza       | 91  | aty           | 143 | mitsingevagna  | 195 | maigna         |
| 40 | vady       | 92  | misotro       | 144 | mikoriagna     | 196 | mety           |
| 41 | vady       | 93  | mihinana      | 145 | mivongana      | 197 | mariny         |
| 42 | neny       | 94  | magnekitsa    | 146 | mibotsigna     | 198 | lavitsa        |
| 43 | baba       | 95  | mitroka       | 147 | masoandro      | 199 | ankavanana     |
| 44 | biby       | 96  | mandrehoka    | 148 | volagna        | 200 | ankavia        |
| 45 | trondro    | 97  | mandoa        | 149 | kintana        | 201 | agny           |
| 46 | vorogna    | 98  | mitsioka      | 150 | rano           | 202 | agnaty         |
| 47 | amboa      | 99  | miaigna       | 151 | oragna         | 203 | miaraka        |
| 48 | hao        | 100 | mihehy        | 152 | vavarano       | 204 | sy             |
| 49 | bibilava   | 101 | mahita        | 153 | farihy         | 205 | raha           |
| 50 | hakana     | 102 | mitaino       | 154 | ranomasina     | 206 | satria         |
| 51 | hazo       | 103 | mahay         | 155 | sira           | 207 | agnarana       |
| 52 | ala        | 104 | mieritseritsa | 156 | vato           |     |                |

**53 - Betsimisaraka (Maroantsetra)**

|    |            |     |                |     |               |     |             |
|----|------------|-----|----------------|-----|---------------|-----|-------------|
| 1  | zaha       | 53  | kobe           | 105 | manimbolo     | 157 | fasika      |
| 2  | ano        | 54  | voankazo       | 106 | matahotro     | 158 | vovoka      |
| 3  | izy        | 55  | voa            | 107 | mandry        | 159 | tany        |
| 4  | atsika     | 56  | ravigny        | 108 | velogna       | 160 | rahona      |
| 5  | andre      | 57  | faka           | 109 | maty          | 161 | zavona      |
| 6  | zare       | 58  | hoditry kakazo | 110 | mamono        | 162 | lanitra     |
| 7  | ty         | 59  | voninkazo      | 111 | miady         | 163 | rivotra     |
| 8  | zegny      | 60  | ahitra         | 112 | mihaza        | 164 | ranomandry  |
| 9  | eto        | 61  | tady           | 113 | mamango       | 165 | ranomandry  |
| 10 | ako        | 62  | hoditry        | 114 | manapaka      | 166 | setroko     |
| 11 | zovy       | 63  | hena           | 115 | mamaky        | 167 | afo         |
| 12 | ino        | 64  | ra             | 116 | mamira antsy  | 168 | lavenogno   |
| 13 | aiza       | 65  | taholagna      | 117 | mirapy        | 169 | mandoro     |
| 14 | oviagna    | 66  | taviny         | 118 | mangady       | 170 | lalagna     |
| 15 | ahoana     | 67  | atody          | 119 | miomana       | 171 | tanety      |
| 16 | tsy        | 68  | tandroka       | 120 | magnembagna   | 172 | mena        |
| 17 | jiaby      | 69  | rambony        | 121 | mandeha       | 173 | mahitso     |
| 18 | maro       | 70  | volomborogno   | 122 | avy           | 174 | asaka       |
| 19 | vitsivitsy | 71  | randragna      | 123 | mandry        | 175 | fotsy       |
| 20 | hely       | 72  | loha           | 124 | mipetraka     | 176 | mainty      |
| 21 | hafa       | 73  | tadigny        | 125 | mitsangana    | 177 | aligny      |
| 22 | araiky     | 74  | maso           | 126 | mihodigna     | 178 | andro       |
| 23 | aro        | 75  | orogna         | 127 | lavo          | 179 | taona       |
| 24 | telo       | 76  | vava           | 128 | magnamia      | 180 | mafana      |
| 25 | efatra     | 77  | nify           | 129 | mitantana     | 181 | mangatsiaka |
| 26 | dimy       | 78  | lela           | 130 | tiregny       | 182 | feny        |
| 27 | maventy    | 79  | angofo         | 131 | akasoko       | 183 | vaovao      |
| 28 | lava       | 80  | tongotra       | 132 | manasa        | 184 | antitra     |
| 29 | malalaka   | 81  | vavitsy        | 133 | mamafa        | 185 | tsara       |
| 30 | matevina   | 82  | lohalika       | 134 | mitifitra     | 186 | ratsy       |
| 31 | mavesatra  | 83  | tagnana        | 135 | manosika      | 187 | lo          |
| 32 | hely       | 84  | elatra         | 136 | mambalabala   | 188 | maloto      |
| 33 | fohy       | 85  | kibo           | 137 | mamehy        | 189 | mahitsy     |
| 34 | tery       | 86  | tsinay         | 138 | manjaitra     | 190 | boribory    |
| 35 | manify     | 87  | ambozogna      | 139 | magnisa       | 191 | marangitry  |
| 36 | viavy      | 88  | tahezagna      | 140 | mivolagna     | 192 | donto       |
| 37 | lalahy     | 89  | tratra         | 141 | mihira        | 193 | malamatra   |
| 38 | olo        | 90  | fo             | 142 | midola        | 194 | mando       |
| 39 | zaza       | 91  | aty            | 143 | mitsingevagna | 195 | maina       |
| 40 | vady       | 92  | migiaka        | 144 | mikoriagna    | 196 | mety        |
| 41 | vady       | 93  | mihinana       | 145 | mandry        | 197 | marikitry   |
| 42 | reny       | 94  | magnekitra     | 146 | mibontsigna   | 198 | lavitra     |
| 43 | baba       | 95  | mifiaka        | 147 | masova        | 199 | havanana    |
| 44 | biby       | 96  | mandrehoka     | 148 | davolagna     | 200 | havia       |
| 45 | loko       | 97  | mandoa         | 149 | lakitagna     | 201 | agny        |
| 46 | vorogno    | 98  | mifiko         | 150 | rano          | 202 | agnatiny    |
| 47 | amboa      | 99  | miaigny        | 151 | oragnandro    | 203 | amin ny     |
| 48 | ho         | 100 | mimoehy        | 152 | loharano      | 204 | sy          |
| 49 | bibilava   | 101 | mahita         | 153 | farihy        | 205 | raha        |
| 50 | kakagna    | 102 | mitandregny    | 154 | ranomasina    | 206 | satria      |
| 51 | kakazo     | 103 | mahe           | 155 | sira          | 207 | agnarana    |
| 52 | atiala     | 104 | mieritreritry  | 156 | vato          |     |             |

**54 - Merina (Analavory)**

|    |            |     |               |     |                  |     |                |
|----|------------|-----|---------------|-----|------------------|-----|----------------|
| 1  | zahakony   | 53  | kobay         | 105 | mamofona         | 157 | fasika         |
| 2  | ena        | 54  | vokazo        | 106 | matahoatra       | 158 | vovoka         |
| 3  | izy        | 55  | vo            | 107 | matory           | 159 | tany           |
| 4  | tsika      | 56  | ravina        | 108 | velona           | 160 | rahoana        |
| 5  | nareo      | 57  | faka          | 109 | maty             | 161 | zavona         |
| 6  | zareo      | 58  | hodikazo      | 110 | mamono           | 162 | lanitra        |
| 7  | ity        | 59  | voninkazo     | 111 | miady            | 163 | rivotra        |
| 8  | izany      | 60  | vilona        | 112 | miaza            | 164 | ranomandry     |
| 9  | eto        | 61  | tady          | 113 | mikapoka         | 165 | ranomandry     |
| 10 | ao         | 62  | hoditra       | 114 | mandidy          | 166 | setroka        |
| 11 | ia         | 63  | hena          | 115 | mamaky           | 167 | afo            |
| 12 | inona      | 64  | ra            | 116 | manindrona antsy | 168 | lavena         |
| 13 | aiza       | 65  | tolana        | 117 | mikiky           | 169 | mandoro        |
| 14 | vina       | 66  | taviny        | 118 | mangady          | 170 | lalana         |
| 15 | aona       | 67  | atody         | 119 | milomano         | 171 | tendrombohitra |
| 16 | tsy        | 68  | tandroka      | 120 | manidina         | 172 | mena           |
| 17 | rehetra    | 69  | rambo         | 121 | mandeha          | 173 | maintso        |
| 18 | bediabe    | 70  | volomborona   | 122 | avy              | 174 | mavo           |
| 19 | vitsivitsy | 71  | volo          | 123 | matory           | 175 | fotsy          |
| 20 | kely       | 72  | lo            | 124 | mipetraka        | 176 | menty          |
| 21 | afa        | 73  | sofina        | 125 | mitsangana       | 177 | alina          |
| 22 | ray        | 74  | maso          | 126 | miodina          | 178 | andro          |
| 23 | roa        | 75  | orona         | 127 | mianjera         | 179 | taona          |
| 24 | telo       | 76  | vava          | 128 | manome           | 180 | mafana         |
| 25 | efatra     | 77  | nify          | 129 | mitantana        | 181 | mangatsika     |
| 26 | dimy       | 78  | lela          | 130 | manery           | 182 | feno           |
| 27 | lebe       | 79  | hoho          | 131 | manakasoka       | 183 | vaovao         |
| 28 | lava       | 80  | tongotra      | 132 | manasa           | 184 | antitra        |
| 29 | malalaka   | 81  | ranjo         | 133 | mamafa           | 185 | tsara          |
| 30 | matevina   | 82  | lohalika      | 134 | mitifitra        | 186 | ratsy          |
| 31 | mazevatra  | 83  | tanana        | 135 | manosika         | 187 | lo             |
| 32 | kely       | 84  | elatra        | 136 | mitoraka         | 188 | maloto         |
| 33 | fo         | 85  | kibo          | 137 | mame             | 189 | mahintsy       |
| 34 | tery       | 86  | tsinay        | 138 | manjaitra        | 190 | boribory       |
| 35 | manify     | 87  | vozona        | 139 | manisa           | 191 | maranitra      |
| 36 | vevavy     | 88  | soroka        | 140 | milaza           | 192 | dombo          |
| 37 | lela       | 89  | tratra        | 141 | mihira           | 193 | malama         |
| 38 | olona      | 90  | fo            | 142 | milalao          | 194 | mando          |
| 39 | zaza       | 91  | aty           | 143 | mitsingevana     | 195 | maina          |
| 40 | vady       | 92  | misotro       | 144 | mikorina         | 196 | mety           |
| 41 | vady       | 93  | minana        | 145 | mandry           | 197 | akaiky         |
| 42 | reny       | 94  | manekitra     | 146 | mibontsina       | 198 | lavitra        |
| 43 | ray        | 95  | minono        | 147 | masoandro        | 199 | avanana        |
| 44 | biby       | 96  | mandrehoaka   | 148 | volana           | 200 | avia           |
| 45 | trondro    | 97  | mando         | 149 | kintana          | 201 | any            |
| 46 | vorina     | 98  | mitsoka       | 150 | rano             | 202 | anaty          |
| 47 | alika      | 99  | miaina        | 151 | orana            | 203 | amin ny        |
| 48 | hao        | 100 | mime          | 152 | renirano         | 204 | sy             |
| 49 | bibilava   | 101 | maita         | 153 | farihy           | 205 | ra             |
| 50 | kankana    | 102 | miaino        | 154 | ranomasina       | 206 | satry          |
| 51 | hazo       | 103 | mahay         | 155 | sira             | 207 | anarana        |
| 52 | ala        | 104 | mieritreritra | 156 | vato             |     |                |



**55 - Betsimisaraka (Sahavato)**

|    |           |     |                |     |                   |     |            |
|----|-----------|-----|----------------|-----|-------------------|-----|------------|
| 1  | zao       | 53  | fioka          | 105 | mifofogna         | 157 | fasina     |
| 2  | ano       | 54  | vonkazo        | 106 | vaka              | 158 | vovoka     |
| 3  | ize       | 55  | vihine         | 107 | mandre            | 159 | tane       |
| 4  | ansena    | 56  | ravina         | 108 | velona            | 160 | rahogna    |
| 5  | anareo    | 57  | vahatra        | 109 | mate              | 161 | zavona     |
| 6  | zareo     | 58  | hoditra kakazo | 110 | mamono            | 162 | lagnitra   |
| 7  | ty        | 59  | vognonkazo     | 111 | miade             | 163 | rivotra    |
| 8  | zane      | 60  | ahitra         | 112 | mitadia           | 164 | ranomandre |
| 9  | aketo     | 61  | tade           | 113 | mamango           | 165 | ranomandre |
| 10 | ako       | 62  | hoditra        | 114 | manapaka          | 166 | toesina    |
| 11 | zovy      | 63  | hena           | 115 | mamake            | 167 | afo        |
| 12 | ino       | 64  | ra             | 116 | mampitrobaka anse | 168 | lavenona   |
| 13 | akaza     | 65  | tolagna        | 117 | magnisika         | 169 | magnoro    |
| 14 | oviena    | 66  | tavine         | 118 | mangade           | 170 | lalana     |
| 15 | aona      | 67  | tode           | 119 | mandagno          | 171 | dongona    |
| 16 | tse       | 68  | tandroka       | 120 | miborogna         | 172 | mena       |
| 17 | rehetra   | 69  | volombody      | 121 | mandia            | 173 | meso       |
| 18 | maro      | 70  | volomborogna   | 122 | ave               | 174 | mavo       |
| 19 | visivise  | 71  | randrana       | 123 | mandre            | 175 | fose       |
| 20 | bitaka    | 72  | loha           | 124 | mipetraka         | 176 | mintina    |
| 21 | afa       | 73  | tadigne        | 125 | misangana         | 177 | alina      |
| 22 | reka      | 74  | maso           | 126 | miodigna          | 178 | andro      |
| 23 | roe       | 75  | orogna         | 127 | lavo              | 179 | tona       |
| 24 | telo      | 76  | vava           | 128 | magnomia          | 180 | mafana     |
| 25 | efatra    | 77  | nife           | 129 | mitana            | 181 | mangaseka  |
| 26 | dime      | 78  | lela           | 130 | manere            | 182 | feno       |
| 27 | lebe      | 79  | vanzakoho      | 131 | magnakasoka       | 183 | vovo       |
| 28 | lava      | 80  | ongotra        | 132 | manasa            | 184 | antitra    |
| 29 | malalaka  | 81  | randro         | 133 | mamafa            | 185 | sara       |
| 30 | matevina  | 82  | loalitra       | 134 | mitifitra         | 186 | rase       |
| 31 | mavesatra | 83  | tagnana        | 135 | manosika          | 187 | lo         |
| 32 | bitaka    | 84  | elatra         | 136 | manambioka        | 188 | maloto     |
| 33 | foika     | 85  | kibo           | 137 | mamehe            | 189 | mahise     |
| 34 | tere      | 86  | olika          | 138 | manzetra          | 190 | boribore   |
| 35 | manife    | 87  | vozogna        | 139 | magnisa           | 191 | maragnitra |
| 36 | viave     | 88  | tambokoka      | 140 | mizaka            | 192 | dombo      |
| 37 | lelae     | 89  | tratra         | 141 | mihira            | 193 | malady     |
| 38 | olona     | 90  | fo             | 142 | milalao           | 194 | mando      |
| 39 | zaza      | 91  | ate            | 143 | miempo            | 195 | megna      |
| 40 | vade      | 92  | omana          | 144 | mandia            | 196 | mete       |
| 41 | vade      | 93  | omana          | 145 | mandre            | 197 | amarivo    |
| 42 | endre     | 94  | magnifatra     | 146 | mivonto           | 198 | alavitra   |
| 43 | iaba      | 95  | misesitra      | 147 | mosoandro         | 199 | avanana    |
| 44 | bibe      | 96  | mandrehoka     | 148 | volana            | 200 | avia       |
| 45 | loka      | 97  | mandoa         | 149 | kintana           | 201 | akagne     |
| 46 | vorogna   | 98  | misotra        | 150 | rano              | 202 | agnate     |
| 47 | kiva      | 99  | miegna         | 151 | orana             | 203 | amin ny    |
| 48 | ho        | 100 | mimehe         | 152 | tegnarano         | 204 | se         |
| 49 | biblava   | 101 | mahita         | 153 | ose               | 205 | raha       |
| 50 | vike      | 102 | miteno         | 154 | ranomasina        | 206 | satria     |
| 51 | kakazo    | 103 | mahe           | 155 | sira              | 207 | agnarana   |
| 52 | atiala    | 104 | mieritreritra  | 156 | vato              |     |            |

**56 - Mahafaly (Ejeda)**

|    |           |     |              |     |                |     |                 |
|----|-----------|-----|--------------|-----|----------------|-----|-----------------|
| 1  | iaho      | 53  | kobay        | 105 | manimbo        | 157 | faseke          |
| 2  | iriha     | 54  | voakantae    | 106 | mavaka         | 158 | deboke          |
| 3  | ireke     | 55  | voa          | 107 | miroro         | 159 | tane            |
| 4  | itika     | 56  | ravene       | 108 | miay           | 160 | rahogne         |
| 5  | inareo    | 57  | fototse      | 109 | mate           | 161 | zavogne         |
| 6  | iareo     | 58  | holinketae   | 110 | mandenta       | 162 | lagnitse        |
| 7  | intoy     | 59  | vognene      | 111 | mialy          | 163 | tioke           |
| 8  | ezao      | 60  | ahetse       | 112 | mipay          | 164 | ranomandry      |
| 9  | etoa      | 61  | taly         | 113 | mamango        | 165 | rano mivangagne |
| 10 | ao        | 62  | holitse      | 114 | mandily        | 166 | setroke         |
| 11 | ia        | 63  | hena         | 115 | manilake       | 167 | afo             |
| 12 | ino       | 64  | lio          | 116 | mitomboke meso | 168 | lavenoke        |
| 13 | aia       | 65  | taola        | 117 | mikiake        | 169 | magnoro         |
| 14 | nombia    | 66  | vondrake     | 118 | mihaly         | 170 | lala            |
| 15 | akore     | 67  | atoly        | 119 | milagno        | 171 | vohitse         |
| 16 | tsie      | 68  | tsifa        | 120 | mitily         | 172 | mena            |
| 17 | iaby      | 69  | ohie         | 121 | mamindra       | 173 | maitso          |
| 18 | maro      | 70  | volomboro    | 122 | avy            | 174 | vogne           |
| 19 | tsiampe   | 71  | volo         | 123 | mandre         | 175 | foty            |
| 20 | kele      | 72  | loha         | 124 | mitomboke      | 176 | mainte          |
| 21 | hafa      | 73  | sofy         | 125 | mitsanga       | 177 | halike          |
| 22 | raike     | 74  | fijere       | 126 | mihodike       | 178 | andro           |
| 23 | roe       | 75  | oro          | 127 | mitonta        | 179 | tao             |
| 24 | telo      | 76  | vava         | 128 | magnome        | 180 | mae             |
| 25 | efatse    | 77  | nife         | 129 | mitanjake      | 181 | manitsy         |
| 26 | lime      | 78  | lela         | 130 | mipiritsy      | 182 | feny            |
| 27 | befoloay  | 79  | hoho         | 131 | mampikasoke    | 183 | vaovao          |
| 28 | lava      | 80  | tomboke      | 132 | manasa         | 184 | antetse         |
| 29 | malalake  | 81  | ranjo        | 133 | mipio          | 185 | soa             |
| 30 | mateve    | 82  | ongotse      | 134 | mitifitse      | 186 | raty            |
| 31 | mavesatse | 83  | tagna        | 135 | manoseke       | 187 | lo              |
| 32 | kele      | 84  | elatse       | 136 | mitorake       | 188 | maloto          |
| 33 | bory      | 85  | troke        | 137 | mandrohy       | 189 | mahity          |
| 34 | maifitse  | 86  | tinay        | 138 | mitrebeke      | 190 | boribory        |
| 35 | matify    | 87  | vozo         | 139 | magnisake      | 191 | maragnitse      |
| 36 | ampisafe  | 88  | lambosy      | 140 | mivola         | 192 | sihanake        |
| 37 | zaranjaka | 89  | aragna       | 141 | miantsa        | 193 | malama          |
| 38 | ndaty     | 90  | arofo        | 142 | mihisa         | 194 | lende           |
| 39 | ajaja     | 91  | ate          | 143 | mihafy         | 195 | maike           |
| 40 | valy      | 92  | mino         | 144 | midorasitse    | 196 | mete            |
| 41 | valy      | 93  | mitava       | 145 | mandreke       | 197 | marine          |
| 42 | nene      | 94  | mitifatse    | 146 | mibokinake     | 198 | lavitse         |
| 43 | baba      | 95  | mitsintsike  | 147 | andro          | 199 | havagna         |
| 44 | biby      | 96  | mandrehoke   | 148 | vola           | 200 | havia           |
| 45 | fia       | 97  | mandoa       | 149 | vasia          | 201 | agne            |
| 46 | voron     | 98  | mitioke      | 150 | rano           | 202 | agnate          |
| 47 | amboa     | 99  | miay         | 151 | ora            | 203 | amie            |
| 48 | hao       | 100 | mihehe       | 152 | vavaramo       | 204 | noho            |
| 49 | bibilava  | 101 | mahisake     | 153 | ranovory       | 205 | naho            |
| 50 | soko      | 102 | mijanfy      | 154 | riake          | 206 | satria          |
| 51 | hetae     | 103 | mahafantatse | 155 | sira           | 207 | agnara          |
| 52 | ala       | 104 | mandinike    | 156 | vato           |     |                 |

**57 - Antanosy (Belamoty)**

|    |           |     |              |     |                |     |             |
|----|-----------|-----|--------------|-----|----------------|-----|-------------|
| 1  | zaho      | 53  | kobay        | 105 | manofa         | 157 | fasiny      |
| 2  | hanao     | 54  | voakazo      | 106 | mataosy        | 158 | vovotany    |
| 3  | izy       | 55  | vihiny       | 107 | mandry         | 159 | tany        |
| 4  | sika      | 56  | raviny       | 108 | velo           | 160 | rahony      |
| 5  | handreo   | 57  | vahany       | 109 | maty           | 161 | mika        |
| 6  | rireo     | 58  | holikazo     | 110 | mamono         | 162 | lanignitsy  |
| 7  | tiho      | 59  | ravikazo     | 111 | mialy          | 163 | rivosy      |
| 8  | izao      | 60  | akata        | 112 | mamita         | 164 | ranomandriy |
| 9  | etaho     | 61  | taly         | 113 | manjera        | 165 | vaingadrano |
| 10 | ao        | 62  | amgozy       | 114 | manapaky       | 166 | setroky     |
| 11 | ija       | 63  | hena         | 115 | mamaky         | 167 | afo         |
| 12 | ino       | 64  | lio          | 116 | mitomboky mesa | 168 | lavenoky    |
| 13 | eza       | 65  | taola        | 117 | mikiky         | 169 | manoro      |
| 14 | nombia    | 66  | vondrany     | 118 | mihaly         | 170 | lala        |
| 15 | manoakory | 67  | atoly        | 119 | milano         | 171 | vohidry     |
| 16 | sizy      | 68  | sifa         | 120 | mitily         | 172 | mena        |
| 17 | iziaby    | 69  | ohihy        | 121 | mandeha        | 173 | maintso     |
| 18 | maro      | 70  | volomboro    | 122 | avy            | 174 | mavo        |
| 19 | kidikidy  | 71  | volo         | 123 | mandry         | 175 | fosy        |
| 20 | tsiampy   | 72  | loha         | 124 | mitoboky       | 176 | meity       |
| 21 | hafa      | 73  | sofy         | 125 | misanga        | 177 | hariva      |
| 22 | raiky     | 74  | maso         | 126 | miodiky        | 178 | andro       |
| 23 | ro        | 75  | oro          | 127 | manegny        | 179 | tao         |
| 24 | telo      | 76  | vava         | 128 | magnome        | 180 | mafana      |
| 25 | efasy     | 77  | nify         | 129 | mita           | 181 | manara      |
| 26 | dimy      | 78  | lela         | 130 | mitery         | 182 | feny        |
| 27 | befoloay  | 79  | vazankoho    | 131 | mikasiky       | 183 | vaovao      |
| 28 | lava      | 80  | tomboky      | 132 | manasa         | 184 | antitsy     |
| 29 | malalaky  | 81  | randro       | 133 | mamafa         | 185 | soa         |
| 30 | mateviny  | 82  | pokopoko     | 134 | mitifisy       | 186 | rasy        |
| 31 | mavesasy  | 83  | tana         | 135 | manosiky       | 187 | lo          |
| 32 | keliky    | 84  | elany        | 136 | manary         | 188 | maloto      |
| 33 | fohiky    | 85  | troky        | 137 | mamehy         | 189 | mahitsy     |
| 34 | tery      | 86  | sinay        | 138 | mandraitsy     | 190 | foiky       |
| 35 | matify    | 87  | vozo         | 139 | magnisaky      | 191 | maranitsy   |
| 36 | ampela    | 88  | lambosy      | 140 | mizaka         | 192 | dofoky      |
| 37 | lelahy    | 89  | tratra       | 141 | mibeko         | 193 | malama      |
| 38 | olo       | 90  | fo           | 142 | mihisa         | 194 | mando       |
| 39 | zaza      | 91  | aty          | 143 | mihafy         | 195 | maiky       |
| 40 | valy      | 92  | mino         | 144 | mipitiky       | 196 | mety        |
| 41 | valy      | 93  | mihina       | 145 | mandriky       | 197 | marikitsy   |
| 42 | neny      | 94  | manifatry    | 146 | mironto        | 198 | lavisy      |
| 43 | papa      | 95  | minono       | 147 | masoandro      | 199 | akavana     |
| 44 | biby      | 96  | mandrehoky   | 148 | vola           | 200 | akavia      |
| 45 | fia       | 97  | mandoa       | 149 | kitany         | 201 | agny        |
| 46 | voron     | 98  | mifioky      | 150 | rano           | 202 | anaty       |
| 47 | amboa     | 99  | maiky        | 151 | ora            | 203 | amin ny     |
| 48 | hao       | 100 | homehy       | 152 | renirano       | 204 | sy          |
| 49 | bibilava  | 101 | mahita       | 153 | farihy         | 205 | nohiha      |
| 50 | soko      | 102 | miteno       | 154 | riaky          | 206 | satria      |
| 51 | hazo      | 103 | mahay        | 155 | sira           | 207 | agnara      |
| 52 | ala       | 104 | mieriseritry | 156 | vato           |     |             |

**58 - Sihanaka (Andilamena)**

|    |            |     |                |     |                   |     |            |
|----|------------|-----|----------------|-----|-------------------|-----|------------|
| 1  | za         | 53  | anjera         | 105 | manimbolo         | 157 | fasika     |
| 2  | ianao      | 54  | voankazo       | 106 | matahotra         | 158 | jofo       |
| 3  | izy        | 55  | voniny         | 107 | matory            | 159 | tany       |
| 4  | antsika    | 56  | ravina         | 108 | velona            | 160 | rondro     |
| 5  | anareo     | 57  | fakany         | 109 | maty              | 161 | zavina     |
| 6  | zareo      | 58  | vatrankazo     | 110 | mamono            | 162 | langitra   |
| 7  | ity        | 59  | vonikazo       | 111 | miady             | 163 | rivotra    |
| 8  | zany       | 60  | ahitra         | 112 | mitazana          | 164 | ranomandry |
| 9  | eto        | 61  | tady           | 113 | mitaroka          | 165 | ranomandry |
| 10 | ao         | 62  | hoditra        | 114 | manaobale         | 166 | hetona     |
| 11 | iza        | 63  | babaty         | 115 | mamaky            | 167 | afo        |
| 12 | inona      | 64  | ra             | 116 | manatsatoka antsy | 168 | lavenona   |
| 13 | aiza       | 65  | taolana        | 117 | mikiky            | 169 | magnoro    |
| 14 | ovina      | 66  | taviny         | 118 | mangady           | 170 | lalana     |
| 15 | ahoana     | 67  | atody          | 119 | miseka            | 171 | tanety     |
| 16 | tsy        | 68  | tandroka       | 120 | manidina          | 172 | mena       |
| 17 | daholo     | 69  | rambo          | 121 | mandeha           | 173 | maitso     |
| 18 | maro       | 70  | volomborona    | 122 | avy               | 174 | hasaka     |
| 19 | vitsivitsy | 71  | volo           | 123 | mandry            | 175 | fotsy      |
| 20 | kely       | 72  | loha           | 124 | mitoetra          | 176 | mainty     |
| 21 | hafa       | 73  | sofina         | 125 | mitsangana        | 177 | alina      |
| 22 | iray       | 74  | maso           | 126 | mihodina          | 178 | andro      |
| 23 | roa        | 75  | orona          | 127 | lavo              | 179 | taona      |
| 24 | telo       | 76  | vava           | 128 | manome            | 180 | mafana     |
| 25 | efatra     | 77  | nify           | 129 | mitantana         | 181 | mangatseka |
| 26 | dimy       | 78  | lela           | 130 | manery            | 182 | feno       |
| 27 | ngeda      | 79  | angofa         | 131 | mampikasoka       | 183 | vaovao     |
| 28 | lava       | 80  | tongotra       | 132 | manasa            | 184 | antitra    |
| 29 | malalaka   | 81  | vovinty        | 133 | mamafa            | 185 | tsara      |
| 30 | matevina   | 82  | lohalika       | 134 | mitifitra         | 186 | ratsy      |
| 31 | mavesatra  | 83  | tanana         | 135 | manosika          | 187 | lo         |
| 32 | kely       | 84  | elatra         | 136 | manoraka          | 188 | maloto     |
| 33 | pota       | 85  | kibo           | 137 | mamatotra         | 189 | mahitsy    |
| 34 | tery       | 86  | tsinay         | 138 | manjaitra         | 190 | boribory   |
| 35 | matify     | 87  | vozona         | 139 | magnisa           | 191 | maragnitra |
| 36 | vahiavy    | 88  | lamosina       | 140 | milaza            | 192 | malomina   |
| 37 | lehilahy   | 89  | tratra         | 141 | mihira            | 193 | malama     |
| 38 | olona      | 90  | fo             | 142 | midalao           | 194 | mando      |
| 39 | zaza       | 91  | kobony         | 143 | mitsikembo        | 195 | maigna     |
| 40 | vady       | 92  | misotro        | 144 | mijiregna         | 196 | mety       |
| 41 | vady       | 93  | mihinana       | 145 | mandry            | 197 | akaiky     |
| 42 | niny       | 94  | manaikitra     | 146 | mivonto           | 198 | avitra     |
| 43 | baba       | 95  | mifiaka        | 147 | masova            | 199 | ankavanana |
| 44 | biby       | 96  | mandreraka     | 148 | volana            | 200 | ankavia    |
| 45 | trondro    | 97  | mando          | 149 | kintana           | 201 | any        |
| 46 | vorona     | 98  | mitsoka        | 150 | rano              | 202 | anaty      |
| 47 | amboa      | 99  | miaina         | 151 | orana             | 203 | amin ny    |
| 48 | hao        | 100 | mihomehy       | 152 | renirano          | 204 | sy         |
| 49 | bibilava   | 101 | mahita         | 153 | farihy            | 205 | raha       |
| 50 | vika       | 102 | mihaino        | 154 | ranomasina        | 206 | satria     |
| 51 | kakazo     | 103 | manampahaizana | 155 | sira              | 207 | anarana    |
| 52 | ala        | 104 | mieritreritra  | 156 | vato              |     |            |

**59 - Antandroy (Tsihombe)**

|    |           |     |              |     |              |     |             |
|----|-----------|-----|--------------|-----|--------------|-----|-------------|
| 1  | iraho     | 53  | kobay        | 105 | mihantsogne  | 157 | faseke      |
| 2  | irehe     | 54  | voankazo     | 106 | matahotse    | 158 | deboke      |
| 3  | ireke     | 55  | voa          | 107 | miroro       | 159 | tane        |
| 4  | ntika     | 56  | ravigne      | 108 | velogne      | 160 | rahogne     |
| 5  | nareo     | 57  | vahae        | 109 | mate         | 161 | zono        |
| 6  | iareo     | 58  | holinkata    | 110 | mamono       | 162 | lagnitse    |
| 7  | toy       | 59  | folera       | 111 | mialy        | 163 | tioke       |
| 8  | zane      | 60  | ahitse       | 112 | mihaza       | 164 | ranomandre  |
| 9  | etoa      | 61  | taly         | 113 | mijera       | 165 | ranomandre  |
| 10 | ao        | 62  | holitse      | 114 | mandily      | 166 | setroke     |
| 11 | ia        | 63  | hena         | 115 | mamaky       | 167 | afo         |
| 12 | ino       | 64  | lio          | 116 | mitomboke    | 168 | lavenoke    |
| 13 | aia       | 65  | taolagne     | 117 | mikiky       | 169 | magnoro     |
| 14 | mbia      | 66  | vondrae      | 118 | magnaly      | 170 | lalagne     |
| 15 | akore     | 67  | atoly        | 119 | milomagno    | 171 | vohitse     |
| 16 | tsie      | 68  | tsifa        | 120 | mitiligne    | 172 | mena        |
| 17 | iaby      | 69  | ramboe       | 121 | magnavelo    | 173 | maintso     |
| 18 | tsiefa    | 70  | volomborogne | 122 | avy          | 174 | mavo        |
| 19 | tsiampe   | 71  | maroy        | 123 | mandre       | 175 | foty        |
| 20 | kede      | 72  | loha         | 124 | toboke       | 176 | mainte      |
| 21 | hafa      | 73  | sofigne      | 125 | mitsangagne  | 177 | halegne     |
| 22 | raike     | 74  | maso         | 126 | miodigne     | 178 | andro       |
| 23 | roe       | 75  | orogne       | 127 | tota         | 179 | taogne      |
| 24 | telo      | 76  | vava         | 128 | magnome      | 180 | mafana      |
| 25 | efatse    | 77  | nife         | 129 | mitagne      | 181 | manintsy    |
| 26 | dime      | 78  | lela         | 130 | manere       | 182 | feny        |
| 27 | bey       | 79  | hoho         | 131 | mampikasoke  | 183 | vaovao      |
| 28 | lava      | 80  | tomboke      | 132 | manasa       | 184 | antetse     |
| 29 | malalake  | 81  | ranjogne     | 133 | mamafa       | 185 | fanjaka     |
| 30 | matevegne | 82  | lohaleke     | 134 | mitifitse    | 186 | raty        |
| 31 | mavesatse | 83  | tagnagne     | 135 | manoseke     | 187 | lo          |
| 32 | kede      | 84  | elatse       | 136 | mitorake     | 188 | maloto      |
| 33 | foheke    | 85  | troke        | 137 | mamefe       | 189 | mahitsy     |
| 34 | tere      | 86  | tsinay       | 138 | manjaitse    | 190 | bontolitoly |
| 35 | manify    | 87  | vozogne      | 139 | magnisa      | 191 | maragnitse  |
| 36 | ampela    | 88  | lambosigne   | 140 | mitalily     | 192 | malomogne   |
| 37 | lahilahy  | 89  | tratra       | 141 | mihira       | 193 | malama      |
| 38 | ndaty     | 90  | arofo        | 142 | mihisa       | 194 | legne       |
| 39 | ajaja     | 91  | ate          | 143 | misintogne   | 195 | maike       |
| 40 | valy      | 92  | minogne      | 144 | mijiririagne | 196 | mete        |
| 41 | valy      | 93  | mihinagne    | 145 | mandre       | 197 | marine      |
| 42 | rene      | 94  | manifatse    | 146 | mivonto      | 198 | lavitse     |
| 43 | rae       | 95  | mamiake      | 147 | masoandro    | 199 | havanagne   |
| 44 | biby      | 96  | mandrehoke   | 148 | volagne      | 200 | havia       |
| 45 | fiagne    | 97  | mandoa       | 149 | vasiagne     | 201 | agne        |
| 46 | vorogne   | 98  | mifioke      | 150 | rano         | 202 | agnatee     |
| 47 | amboa     | 99  | miaigne      | 151 | oragne       | 203 | amigne      |
| 48 | hao       | 100 | mihehe       | 152 | renerano     | 204 | naho        |
| 49 | bibilava  | 101 | mahatrea     | 153 | sihanake     | 205 | naho        |
| 50 | soko      | 102 | mitranogne   | 154 | riake        | 206 | satria      |
| 51 | hatae     | 103 | mahay        | 155 | sira         | 207 | agnaragne   |
| 52 | ala       | 104 | mandineke    | 156 | vato         |     |             |

**60 - Sakalava (Belon'i Tsiribihina)**

|    |           |     |              |     |              |     |            |
|----|-----------|-----|--------------|-----|--------------|-----|------------|
| 1  | zaho      | 53  | kobay        | 105 | magnimbo     | 157 | fasiky     |
| 2  | iha       | 54  | voankazo     | 106 | mavozo       | 158 | vovoky     |
| 3  | izy       | 55  | vininy       | 107 | miroro       | 159 | tany       |
| 4  | tsika     | 56  | raviny       | 108 | velo         | 160 | rahona     |
| 5  | nareo     | 57  | vahany       | 109 | mate         | 161 | zavo       |
| 6  | rozy      | 58  | holin kazo   | 110 | mamono       | 162 | lanitse    |
| 7  | ity       | 59  | folera       | 111 | mialy        | 163 | rivotry    |
| 8  | izany     | 60  | ahitsy       | 112 | mamandriky   | 164 | ranomandry |
| 9  | eto       | 61  | osy          | 113 | mamango      | 165 | ranomandry |
| 10 | ao        | 62  | nofotsy      | 114 | manapake     | 166 | setroky    |
| 11 | ia        | 63  | hena         | 115 | mamaky       | 167 | motro      |
| 12 | ino       | 64  | lio          | 116 | tsofoko meso | 168 | lavenike   |
| 13 | aia       | 65  | taola        | 117 | mikiky       | 169 | magnoro    |
| 14 | ombia     | 66  | tsabora      | 118 | mangaly      | 170 | lala       |
| 15 | manahoa   | 67  | atody        | 119 | milomagno    | 171 | dongo      |
| 16 | tsy       | 68  | tsifa        | 120 | mitily       | 172 | mena       |
| 17 | rehetra   | 69  | rambo        | 121 | mandeha      | 173 | maitso     |
| 18 | maro      | 70  | volomboro    | 122 | avy          | 174 | mavo       |
| 19 | kelikely  | 71  | vololo       | 123 | miroro       | 175 | fotsy      |
| 20 | madiniky  | 72  | loha         | 124 | midoboka     | 176 | mainty     |
| 21 | hafa      | 73  | sofy         | 125 | mitsanga     | 177 | hariva     |
| 22 | raiky     | 74  | maso         | 126 | miholiky     | 178 | andro      |
| 23 | roe       | 75  | oro          | 127 | lavo         | 179 | tao        |
| 24 | telo      | 76  | tsihovy      | 128 | manome       | 180 | mafana     |
| 25 | efatra    | 77  | nify         | 129 | mitanta      | 181 | magnitsy   |
| 26 | dimy      | 78  | lela         | 130 | manery       | 182 | feny       |
| 27 | bevata    | 79  | hoho         | 131 | mikosiky     | 183 | vaovao     |
| 28 | haba      | 80  | tomboky      | 132 | manasa       | 184 | antitry    |
| 29 | malalaky  | 81  | ranjo        | 133 | mamafa       | 185 | soa        |
| 30 | matevy    | 82  | tsipoko      | 134 | mitifitsy    | 186 | raty       |
| 31 | mavesatra | 83  | tagna        | 135 | manosika     | 187 | lo         |
| 32 | kely      | 84  | elatsy       | 136 | mitoraky     | 188 | maloto     |
| 33 | boribory  | 85  | kibo         | 137 | mamehy       | 189 | mahaty     |
| 34 | maifitsy  | 86  | tinay        | 138 | manjaitry    | 190 | boribory   |
| 35 | matify    | 87  | vozo         | 139 | magnisaky    | 191 | maranitry  |
| 36 | ampela    | 88  | lambosy      | 140 | miteny       | 192 | dombo      |
| 37 | nahoda    | 89  | tratra       | 141 | mihira       | 193 | malama     |
| 38 | olo       | 90  | fo           | 142 | miisa        | 194 | le         |
| 39 | aja       | 91  | aty          | 143 | miafo        | 195 | maiky      |
| 40 | valy      | 92  | mino         | 144 | mikoria      | 196 | mety       |
| 41 | valy      | 93  | mihina       | 145 | mandry       | 197 | mariniky   |
| 42 | njaray    | 94  | magnekitry   | 146 | boboka       | 198 | lavitsy    |
| 43 | aba       | 95  | minono       | 147 | masoandro    | 199 | havana     |
| 44 | biby      | 96  | mandrehoky   | 148 | volana       | 200 | havia      |
| 45 | fia       | 97  | mandoa       | 149 | vasia        | 201 | agny       |
| 46 | voron     | 98  | mifioky      | 150 | rano         | 202 | agnaty     |
| 47 | amboa     | 99  | miay         | 151 | ora          | 203 | amin ny    |
| 48 | hao       | 100 | mihehy       | 152 | renirano     | 204 | sy         |
| 49 | bibilava  | 101 | manenty      | 153 | dobon        | 205 | raha       |
| 50 | kanka     | 102 | mijanjy      | 154 | ranomasy     | 206 | satria     |
| 51 | hazo      | 103 | mahay        | 155 | sira         | 207 | agnara     |
| 52 | ala       | 104 | mametsivetsy | 156 | vato         |     |            |
