# Supplementary material for: Dialects of Madagascar
Source: PubMed Central journal article supplement (PMC7531839; doi:10.1371/journal.pone.0240170), 2020-10-02
Supplement: pone.0240170.s002.pdf [file pone.0240170.s002.pdf]

**Table S1: Ethnicities, towns and coordinates**

| #  | Ethnicity     | Town                | Coordinates |       |
|----|---------------|---------------------|-------------|-------|
| 1  | Sakalava      | Ambanja             | -13.67      | 48.33 |
| 2  | Sihanaka      | Ambatondrazaka      | -17.87      | 48.42 |
| 3  | Antankarana   | Ambilobe            | -13.20      | 49.05 |
| 4  | Antandroy     | Ambovombe           | -25.17      | 46.08 |
| 5  | Mahafaly      | Ampanihy            | -24.68      | 44.73 |
| 6  | Mikea         | Ampoakafo           | -22.67      | 43.75 |
| 7  | Betsimisaraka | Antalaha            | -14.88      | 50.27 |
| 8  | Merina        | Antananarivo        | -18.90      | 47.52 |
| 9  | Bara          | Betroka             | -23.28      | 46.08 |
| 10 | Zafisoro      | Farafangana         | -22.80      | 47.82 |
| 11 | Betsimisaraka | Fenoarivo-Est       | -17.38      | 49.40 |
| 12 | Betsileo      | Fianarantsoa        | -21.43      | 47.08 |
| 13 | Betsimisaraka | Mahanoro            | -19.88      | 48.80 |
| 14 | Sakalava      | Maintirano          | -18.07      | 44.02 |
| 15 | Sakalava      | Mahajanga           | -15.72      | 46.32 |
| 16 | Antaimoro     | Manakara            | -22.10      | 48.00 |
| 17 | Antambohoaka  | Mananjary           | -21.22      | 48.33 |
| 18 | Tsimihety     | Mandritsara         | -15.83      | 48.82 |
| 19 | Masikoro      | Miary               | -23.30      | 43.72 |
| 20 | Sakalava      | Morondava           | -20.28      | 44.32 |
| 21 | Antanosy      | Tolagnaro           | -25.03      | 46.98 |
| 22 | Vezo          | Toliara             | -23.34      | 43.67 |
| 23 | Antaisaka     | Vangaindrano        | -23.32      | 47.60 |
| 24 | Antankarana   | Vohemar             | -13.37      | 50.00 |
| 25 | Betsileo      | Ambositra           | -20.52      | 47.25 |
| 26 | Betsileo      | Ambalavao           | -21.83      | 46.92 |
| 27 | Antanalana    | Itampolo            | -24.68      | 43.95 |
| 28 | Vezo          | Morombe             | -21.74      | 43.36 |
| 29 | Antanosy      | Bezaha              | -23.50      | 44.50 |
| 30 | Tanala        | Ifanadiana          | -21.28      | 47.63 |
| 31 | Bara          | Ranohira            | -22.43      | 45.35 |
| 32 | Antanalana    | Manorofify          | -23.52      | 43.97 |
| 33 | Antandroy     | Toliara             | -23.34      | 43.67 |
| 34 | Antanalana    | Anakao              | -23.67      | 43.65 |
| 35 | Betsimisaraka | Marolambo           | -20.05      | 48.12 |
| 36 | Betsimisaraka | Antsiranana         | -12.27      | 49.28 |
| 37 | Betsimisaraka | Brickaville         | -18.82      | 49.07 |
| 38 | Betsimisaraka | Toamasina           | -18.15      | 49.42 |
| 39 | Betsimisaraka | Mananara            | -16.17      | 49.77 |
| 40 | Tsimihety     | Mampikony           | -16.09      | 47.64 |
| 41 | Tsimihety     | Andapa              | -14.67      | 49.65 |
| 42 | Nosy Boraha   | Ambodifotatra       | -17.00      | 49.85 |
| 43 | Bara          | Beroroa             | -21.67      | 45.17 |
| 44 | Sakalava      | Miandrivazo         | -19.56      | 45.45 |
| 45 | Vezo          | Morondava           | -20.28      | 44.32 |
| 46 | Bara          | Ihosy               | -22.40      | 46.12 |
| 47 | Tsimihety     | Antsohihy           | -14.88      | 47.98 |
| 48 | Merina        | Maevatanana         | -16.95      | 46.83 |
| 49 | Sakalava      | Besalampy           | -16.75      | 44.47 |
| 50 | Betsimisaraka | Tanambao Manampotsy | -19.48      | 48.57 |
| 51 | Sihanaka      | Morarano Chrome     | -17.75      | 48.17 |
| 52 | Betsileo      | Ambohimahaso        | -21.10      | 47.22 |
| 53 | Betsimisaraka | Maroantsetra        | -15.43      | 49.75 |
| 54 | Merina        | Analavory           | -18.58      | 46.43 |
| 55 | Betsimisaraka | Sahavato            | -20.60      | 48.33 |
| 56 | Mahafaly      | Ejeda               | -24.35      | 44.52 |
| 57 | Antanosy      | Belamoty            | -23.55      | 44.80 |
| 58 | Sihanaka      | Andilamena          | -17.02      | 48.58 |
| 59 | Antandroy     | Tsihombe            | -25.32      | 45.48 |
| 60 | Sakalava      | Belon'i Tsiribihina | -19.70      | 44.55 |

The name of the dialects (ethnicities), the name of the Towns/Villages where dialects were collected together with their coordinates. Latitude and longitude are given in degrees complete of decimals, therefore, the two digits after point do not represent seconds but degree's decimals.
