# Supplementary material for: Dialects of Madagascar
Source: PubMed Central journal article supplement (PMC7531839; doi:10.1371/journal.pone.0240170), 2020-10-02
Supplement: pone.0240170.s003.pdf [file pone.0240170.s003.pdf]

|  |                               |       |       |       |       |       |       |       |       |       |       |       |       |       |       |       |       |       |       |       |       |       |       |       |       |       |       |       |       |       |       |       |       |       |       |       |       |       |       |       |       |       |       |       |       |       |       |       |       |       |       |       |       |       |       |       |       |       |       |       |       |
|--|-------------------------------|-------|-------|-------|-------|-------|-------|-------|-------|-------|-------|-------|-------|-------|-------|-------|-------|-------|-------|-------|-------|-------|-------|-------|-------|-------|-------|-------|-------|-------|-------|-------|-------|-------|-------|-------|-------|-------|-------|-------|-------|-------|-------|-------|-------|-------|-------|-------|-------|-------|-------|-------|-------|-------|-------|-------|-------|-------|-------|-------|-------|
|  | Sakalava (Ambanja)            | 0.000 | 0.412 | 0.130 | 0.510 | 0.493 | 0.481 | 0.225 | 0.385 | 0.407 | 0.393 | 0.295 | 0.397 | 0.375 | 0.394 | 0.324 | 0.368 | 0.365 | 0.224 | 0.423 | 0.419 | 0.422 | 0.448 | 0.383 | 0.112 | 0.369 | 0.417 | 0.498 | 0.460 | 0.458 | 0.393 | 0.416 | 0.465 | 0.497 | 0.460 | 0.422 | 0.229 | 0.392 | 0.369 | 0.310 | 0.208 | 0.250 | 0.298 | 0.420 | 0.395 | 0.421 | 0.443 | 0.267 | 0.355 | 0.346 | 0.421 | 0.406 | 0.389 | 0.302 | 0.400 | 0.423 | 0.497 | 0.435 | 0.387 | 0.437 | 0.401 |
|  | Sihanaka (Ambatondrazaka)     | 0.000 | 0.415 | 0.457 | 0.461 | 0.496 | 0.357 | 0.181 | 0.377 | 0.361 | 0.341 | 0.263 | 0.327 | 0.383 | 0.322 | 0.294 | 0.253 | 0.373 | 0.421 | 0.421 | 0.369 | 0.398 | 0.368 | 0.399 | 0.257 | 0.308 | 0.452 | 0.426 | 0.405 | 0.290 | 0.406 | 0.451 | 0.463 | 0.434 | 0.329 | 0.333 | 0.308 | 0.290 | 0.361 | 0.366 | 0.337 | 0.339 | 0.387 | 0.356 | 0.405 | 0.406 | 0.332 | 0.201 | 0.368 | 0.318 | 0.144 | 0.257 | 0.264 | 0.213 | 0.333 | 0.468 | 0.370 | 0.208 | 0.410 | 0.366 |       |
|  | Antankarana (Ambilobe)        | 0.000 | 0.501 | 0.476 | 0.470 | 0.250 | 0.380 | 0.404 | 0.403 | 0.324 | 0.388 | 0.398 | 0.379 | 0.340 | 0.386 | 0.365 | 0.243 | 0.409 | 0.408 | 0.412 | 0.436 | 0.400 | 0.146 | 0.388 | 0.416 | 0.487 | 0.450 | 0.451 | 0.403 | 0.413 | 0.460 | 0.494 | 0.445 | 0.430 | 0.244 | 0.397 | 0.378 | 0.305 | 0.260 | 0.258 | 0.325 | 0.412 | 0.399 | 0.408 | 0.443 | 0.293 | 0.365 | 0.367 | 0.427 | 0.420 | 0.384 | 0.314 | 0.398 | 0.423 | 0.484 | 0.424 | 0.386 | 0.441 | 0.409 |       |       |
|  | Antandroy (Ambovombe)         | 0.000 | 0.332 | 0.440 | 0.480 | 0.423 | 0.402 | 0.464 | 0.503 | 0.395 | 0.522 | 0.414 | 0.460 | 0.441 | 0.450 | 0.485 | 0.387 | 0.408 | 0.386 | 0.335 | 0.461 | 0.506 | 0.406 | 0.394 | 0.342 | 0.375 | 0.399 | 0.460 | 0.413 | 0.338 | 0.263 | 0.340 | 0.501 | 0.461 | 0.504 | 0.483 | 0.514 | 0.509 | 0.476 | 0.481 | 0.401 | 0.407 | 0.397 | 0.418 | 0.495 | 0.441 | 0.444 | 0.515 | 0.470 | 0.402 | 0.459 | 0.441 | 0.497 | 0.297 | 0.396 | 0.466 | 0.231 | 0.405 |       |       |       |
|  | Mahafaly (Ampanihy)           | 0.000 | 0.344 | 0.470 | 0.420 | 0.337 | 0.439 | 0.500 | 0.412 | 0.498 | 0.334 | 0.447 | 0.437 | 0.437 | 0.483 | 0.298 | 0.309 | 0.343 | 0.269 | 0.405 | 0.478 | 0.416 | 0.362 | 0.204 | 0.297 | 0.347 | 0.459 | 0.344 | 0.221 | 0.342 | 0.247 | 0.502 | 0.479 | 0.504 | 0.499 | 0.496 | 0.486 | 0.473 | 0.498 | 0.337 | 0.347 | 0.328 | 0.366 | 0.481 | 0.421 | 0.365 | 0.517 | 0.467 | 0.414 | 0.463 | 0.452 | 0.481 | 0.170 | 0.349 | 0.451 | 0.279 | 0.342 |       |       |       |       |
|  | Mikea (Ampoakafo)             | 0.000 | 0.472 | 0.459 | 0.367 | 0.463 | 0.502 | 0.440 | 0.523 | 0.323 | 0.473 | 0.472 | 0.475 | 0.465 | 0.221 | 0.274 | 0.384 | 0.248 | 0.433 | 0.467 | 0.463 | 0.396 | 0.320 | 0.255 | 0.390 | 0.481 | 0.360 | 0.284 | 0.418 | 0.298 | 0.525 | 0.475 | 0.526 | 0.526 | 0.499 | 0.488 | 0.468 | 0.507 | 0.324 | 0.346 | 0.289 | 0.384 | 0.488 | 0.463 | 0.371 | 0.534 | 0.488 | 0.432 | 0.485 | 0.467 | 0.506 | 0.337 | 0.395 | 0.484 | 0.379 | 0.343 |       |       |       |       |       |
|  | Betsimisaraka (Antalaha)      | 0.000 | 0.320 | 0.391 | 0.373 | 0.215 | 0.327 | 0.348 | 0.401 | 0.334 | 0.324 | 0.321 | 0.151 | 0.422 | 0.417 | 0.394 | 0.448 | 0.367 | 0.236 | 0.323 | 0.364 | 0.479 | 0.462 | 0.407 | 0.348 | 0.404 | 0.457 | 0.456 | 0.435 | 0.376 | 0.255 | 0.325 | 0.303 | 0.222 | 0.156 | 0.154 | 0.228 | 0.394 | 0.378 | 0.427 | 0.421 | 0.208 | 0.305 | 0.342 | 0.355 | 0.347 | 0.306 | 0.223 | 0.341 | 0.383 | 0.466 | 0.389 | 0.309 | 0.400 | 0.382 |       |       |       |       |       |       |
|  | Merina (Antananarivo)         | 0.000 | 0.333 | 0.339 | 0.300 | 0.159 | 0.305 | 0.347 | 0.300 | 0.247 | 0.224 | 0.345 | 0.391 | 0.391 | 0.322 | 0.372 | 0.314 | 0.367 | 0.157 | 0.238 | 0.423 | 0.404 | 0.366 | 0.182 | 0.352 | 0.405 | 0.416 | 0.385 | 0.302 | 0.276 | 0.287 | 0.254 | 0.323 | 0.335 | 0.297 | 0.299 | 0.327 | 0.285 | 0.375 | 0.358 | 0.306 | 0.116 | 0.325 | 0.293 | 0.156 | 0.191 | 0.197 | 0.080 | 0.291 | 0.420 | 0.325 | 0.140 | 0.350 | 0.304 |       |       |       |       |       |       |       |
|  | Bara (Betroka)                | 0.000 | 0.294 | 0.413 | 0.322 | 0.425 | 0.264 | 0.380 | 0.304 | 0.333 | 0.390 | 0.253 | 0.261 | 0.191 | 0.287 | 0.230 | 0.405 | 0.341 | 0.266 | 0.343 | 0.309 | 0.250 | 0.334 | 0.102 | 0.308 | 0.406 | 0.277 | 0.440 | 0.371 | 0.428 | 0.411 | 0.412 | 0.402 | 0.380 | 0.389 | 0.166 | 0.246 | 0.259 | 0.187 | 0.396 | 0.351 | 0.269 | 0.431 | 0.367 | 0.317 | 0.364 | 0.359 | 0.428 | 0.317 | 0.239 | 0.357 | 0.368 | 0.283 |       |       |       |       |       |       |       |       |
|  | Zafisoro (Farafangana)        | 0.000 | 0.372 | 0.340 | 0.388 | 0.345 | 0.399 | 0.252 | 0.305 | 0.383 | 0.357 | 0.361 | 0.326 | 0.383 | 0.189 | 0.405 | 0.335 | 0.334 | 0.436 | 0.408 | 0.348 | 0.291 | 0.304 | 0.424 | 0.450 | 0.411 | 0.404 | 0.379 | 0.411 | 0.369 | 0.377 | 0.389 | 0.368 | 0.351 | 0.308 | 0.328 | 0.345 | 0.341 | 0.366 | 0.357 | 0.334 | 0.402 | 0.351 | 0.339 | 0.356 | 0.345 | 0.390 | 0.428 | 0.341 | 0.345 | 0.424 | 0.336 |       |       |       |       |       |       |       |       |       |
|  | Betsimisaraka (Fenoarivo-Est) | 0.000 | 0.327 | 0.287 | 0.399 | 0.374 | 0.310 | 0.292 | 0.228 | 0.440 | 0.430 | 0.413 | 0.447 | 0.359 | 0.292 | 0.317 | 0.365 | 0.491 | 0.463 | 0.419 | 0.328 | 0.413 | 0.477 | 0.460 | 0.446 | 0.342 | 0.291 | 0.302 | 0.247 | 0.200 | 0.225 | 0.190 | 0.179 | 0.402 | 0.376 | 0.434 | 0.433 | 0.235 | 0.322 | 0.357 | 0.301 | 0.323 | 0.310 | 0.212 | 0.433 | 0.235 | 0.336 | 0.496 | 0.407 | 0.302 | 0.425 | 0.381 |       |       |       |       |       |       |       |       |       |
|  | Betsileo (Fiaranarantsoa)     | 0.000 | 0.340 | 0.351 | 0.331 | 0.265 | 0.266 | 0.348 | 0.373 | 0.361 | 0.314 | 0.367 | 0.330 | 0.382 | 0.147 | 0.167 | 0.424 | 0.398 | 0.346 | 0.273 | 0.329 | 0.395 | 0.376 | 0.377 | 0.334 | 0.299 | 0.330 | 0.290 | 0.338 | 0.351 | 0.309 | 0.319 | 0.302 | 0.284 | 0.371 | 0.342 | 0.327 | 0.209 | 0.329 | 0.332 | 0.247 | 0.163 | 0.254 | 0.188 | 0.342 | 0.403 | 0.321 | 0.232 | 0.318 | 0.311 |       |       |       |       |       |       |       |       |       |       |       |
|  | Betsimisaraka (Mahanoro)      | 0.000 | 0.436 | 0.354 | 0.296 | 0.226 | 0.367 | 0.471 | 0.465 | 0.416 | 0.472 | 0.387 | 0.375 | 0.314 | 0.382 | 0.499 | 0.489 | 0.437 | 0.323 | 0.431 | 0.484 | 0.495 | 0.477 | 0.194 | 0.353 | 0.230 | 0.219 | 0.312 | 0.364 | 0.327 | 0.276 | 0.428 | 0.403 | 0.457 | 0.461 | 0.348 | 0.324 | 0.406 | 0.168 | 0.300 | 0.314 | 0.257 | 0.317 | 0.217 | 0.514 | 0.417 | 0.307 | 0.450 | 0.429 |       |       |       |       |       |       |       |       |       |       |       |       |
|  | Sakalava (Maintirano)         | 0.000 | 0.377 | 0.366 | 0.379 | 0.390 | 0.211 | 0.205 | 0.287 | 0.256 | 0.318 | 0.382 | 0.339 | 0.320 | 0.320 | 0.277 | 0.310 | 0.379 | 0.253 | 0.289 | 0.428 | 0.273 | 0.454 | 0.383 | 0.453 | 0.426 | 0.422 | 0.408 | 0.391 | 0.399 | 0.244 | 0.219 | 0.211 | 0.294 | 0.392 | 0.352 | 0.236 | 0.444 | 0.392 | 0.360 | 0.379 | 0.371 | 0.461 | 0.332 | 0.340 | 0.370 | 0.380 | 0.234 |       |       |       |       |       |       |       |       |       |       |       |       |       |
|  | Sakalava (Mahajanga)          | 0.000 | 0.338 | 0.308 | 0.363 | 0.395 | 0.383 | 0.366 | 0.387 | 0.389 | 0.316 | 0.330 | 0.360 | 0.437 | 0.406 | 0.403 | 0.341 | 0.390 | 0.438 | 0.479 | 0.402 | 0.370 | 0.304 | 0.358 | 0.357 | 0.378 | 0.351 | 0.338 | 0.355 | 0.371 | 0.357 | 0.372 | 0.391 | 0.336 | 0.272 | 0.329 | 0.366 | 0.322 | 0.340 | 0.313 | 0.326 | 0.395 | 0.448 | 0.379 | 0.337 | 0.425 | 0.338 |       |       |       |       |       |       |       |       |       |       |       |       |       |       |
|  | Antaimoro (Manakara)          | 0.000 | 0.212 | 0.340 | 0.402 | 0.393 | 0.327 | 0.399 | 0.261 | 0.372 | 0.247 | 0.306 | 0.451 | 0.425 | 0.368 | 0.243 | 0.332 | 0.432 | 0.423 | 0.419 | 0.311 | 0.314 | 0.300 | 0.267 | 0.329 | 0.330 | 0.317 | 0.299 | 0.342 | 0.344 | 0.382 | 0.360 | 0.312 | 0.272 | 0.345 | 0.301 | 0.272 | 0.245 | 0.249 | 0.274 | 0.309 | 0.437 | 0.337 | 0.275 | 0.379 | 0.341 |       |       |       |       |       |       |       |       |       |       |       |       |       |       |       |
|  | Antambohoaka (Mananjary)      | 0.000 | 0.340 | 0.408 | 0.405 | 0.340 | 0.407 | 0.314 | 0.361 | 0.248 | 0.316 | 0.454 | 0.429 | 0.381 | 0.245 | 0.356 | 0.448 | 0.449 | 0.420 | 0.244 | 0.307 | 0.264 | 0.229 | 0.326 | 0.349 | 0.310 | 0.292 | 0.350 | 0.356 | 0.392 | 0.388 | 0.323 | 0.247 | 0.357 | 0.234 | 0.241 | 0.258 | 0.246 | 0.250 | 0.222 | 0.451 | 0.347 | 0.240 | 0.383 | 0.357 |       |       |       |       |       |       |       |       |       |       |       |       |       |       |       |       |
|  | Tsimihety (Mandritsara)       | 0.000 | 0.415 | 0.409 | 0.400 | 0.439 | 0.375 | 0.249 | 0.336 | 0.381 | 0.484 | 0.451 | 0.414 | 0.366 | 0.402 | 0.455 | 0.466 | 0.432 | 0.401 | 0.281 | 0.367 | 0.307 | 0.233 | 0.113 | 0.143 | 0.241 | 0.388 | 0.376 | 0.417 | 0.427 | 0.194 | 0.337 | 0.357 | 0.377 | 0.361 | 0.332 | 0.256 | 0.365 | 0.383 | 0.477 | 0.394 | 0.322 | 0.405 | 0.395 |       |       |       |       |       |       |       |       |       |       |       |       |       |       |       |       |       |
|  | Masikoro (Miary)              | 0.000 | 0.162 | 0.256 | 0.152 | 0.336 | 0.418 | 0.399 | 0.337 | 0.265 | 0.176 | 0.265 | 0.405 | 0.244 | 0.223 | 0.398 | 0.226 | 0.476 | 0.416 | 0.485 | 0.460 | 0.438 | 0.431 | 0.411 | 0.426 | 0.206 | 0.249 | 0.144 | 0.274 | 0.415 | 0.402 | 0.273 | 0.482 | 0.426 | 0.369 | 0.415 | 0.407 | 0.480 | 0.286 | 0.284 | 0.419 | 0.355 | 0.244 |       |       |       |       |       |       |       |       |       |       |       |       |       |       |       |       |       |       |
|  | Sakalava (Morondava)          | 0.000 | 0.283 | 0.195 | 0.324 | 0.409 | 0.381 | 0.337 | 0.276 | 0.209 | 0.286 | 0.404 | 0.254 | 0.257 | 0.407 | 0.215 | 0.479 | 0.406 | 0.466 | 0.458 | 0.446 | 0.420 | 0.405 | 0.426 | 0.208 | 0.213 | 0.143 | 0.263 | 0.408 | 0.386 | 0.248 | 0.476 | 0.435 | 0.380 | 0.418 | 0.414 | 0.476 | 0.297 | 0.286 | 0.426 | 0.366 | 0.205 |       |       |       |       |       |       |       |       |       |       |       |       |       |       |       |       |       |       |       |
|  | Antanosy (Tolagnaro)          | 0.000 | 0.301 | 0.268 | 0.407 | 0.334 | 0.275 | 0.349 | 0.332 | 0.208 | 0.352 | 0.207 | 0.322 | 0.416 | 0.306 | 0.416 | 0.394 | 0.427 | 0.411 | 0.418 | 0.406 | 0.389 | 0.391 | 0.224 | 0.249 | 0.277 | 0.220 | 0.403 | 0.344 | 0.294 | 0.417 | 0.363 | 0.320 | 0.370 | 0.354 | 0.421 | 0.333 | 0.189 | 0.356 | 0.351 | 0.273 |       |       |       |       |       |       |       |       |       |       |       |       |       |       |       |       |       |       |       |       |
|  | Vezo (Toliara)                | 0.000 | 0.349 | 0.438 | 0.390 | 0.315 | 0.205 | 0.060 | 0.289 | 0.403 | 0.276 | 0.185 | 0.351 | 0.178 | 0.467 | 0.421 | 0.475 | 0.450 | 0.451 | 0.445 | 0.420 | 0.439 | 0.259 | 0.266 | 0.157 | 0.288 | 0.431 | 0.383 | 0.291 | 0.478 | 0.408 | 0.369 | 0.417 | 0.400 | 0.460 | 0.235 | 0.287 | 0.411 | 0.293 | 0.259 |       |       |       |       |       |       |       |       |       |       |       |       |       |       |       |       |       |       |       |       |       |
|  | Antaisaka (Vangaindrano)      | 0.000 | 0.381 | 0.316 | 0.292 | 0.395 | 0.378 | 0.292 | 0.296 | 0.237 | 0.384 | 0.434 | 0.376 | 0.395 | 0.370 | 0.384 | 0.366 | 0.364 | 0.370 | 0.350 | 0.340 | 0.258 | 0.282 | 0.310 | 0.255 | 0.368 | 0.341 | 0.286 | 0.390 | 0.338 | 0.330 | 0.339 | 0.332 | 0.376 | 0.393 | 0.281 | 0.325 | 0.388 | 0.293 |       |       |       |       |       |       |       |       |       |       |       |       |       |       |       |       |       |       |       |       |       |       |
|  | Antankarana (Vohemar)         | 0.000 | 0.364 | 0.419 | 0.484 | 0.450 | 0.440 | 0.388 | 0.412 | 0.456 | 0.482 | 0.455 | 0.400 | 0.222 | 0.394 | 0.363 | 0.309 | 0.252 | 0.258 | 0.318 | 0.410 | 0.389 | 0.415 | 0.436 | 0.293 | 0.352 | 0.346 | 0.399 | 0.393 | 0.373 | 0.293 | 0.389 | 0.416 | 0.484 | 0.416 | 0.375 | 0.417 | 0.391 |       |       |       |       |       |       |       |       |       |       |       |       |       |       |       |       |       |       |       |       |       |       |       |
|  | Betsileo (Ambositra)          | 0.000 | 0.225 | 0.435 | 0.422 | 0.381 | 0.275 | 0.343 | 0.415 | 0.396 | 0.398 | 0.316 | 0.303 | 0.322 | 0.276 | 0.334 | 0.328 |       |       |       |       |       |       |       |       |       |       |       |       |       |       |       |       |       |       |       |       |       |       |       |       |       |       |       |       |       |       |       |       |       |       |       |       |       |       |       |       |       |       |       |       |
